# Supplementary material for: Investigation of the Emission Rate of Particles when Musicians Play Wind, Woodwind, and Brass Instruments
Source: Hindawi journal article supplement (doi:10.1155/2023/8092828), 2023-12-21
Supplement: f8 [file 8092828.f8.zip]

# “Investigation of the emission rate of particles when musicians play wind, woodwind and brass instruments”

Lukas Schumann<sup>1</sup>, Dorothea von Zadow<sup>2</sup>, Alexander Schmidt<sup>2,3</sup>, Isabell Fernholz<sup>2,3</sup>,  
Anne Hartmann<sup>1</sup>, Liliana Ifrim<sup>2</sup>, Martin Kriegel<sup>1</sup>, Joachim Seybold<sup>4</sup>,  
Dirk Mürbe<sup>2</sup>, Mario Fleischer<sup>2</sup>

<sup>1</sup>Technische Universität Berlin, Hermann-Rietschel-Institut, Berlin, Germany

<sup>2</sup>Charité – Universitätsmedizin Berlin, Corporate Member of Freie Universität Berlin and Humboldt-Universität Berlin, Department of Audiology and Phoniatics, Berlin, Germany

<sup>3</sup>Kurt-Singer-Institute for Music Physiology and Musicians Health, Hanns Eisler School of Music, Berlin, Germany

<sup>4</sup>Charité – Universitätsmedizin Berlin, Corporate Member of Freie Universität Berlin and Humboldt-Universität Berlin, Medical Directorate, Berlin, Germany

E-mail - [mario.fleischer@charite.de](mailto:mario.fleischer@charite.de)

## Contents

|          |                                                                                               |           |
|----------|-----------------------------------------------------------------------------------------------|-----------|
| <b>1</b> | <b>Definitions</b>                                                                            | <b>1</b>  |
| 1.1      | Read data . . . . .                                                                           | 1         |
| 1.2      | Load routines . . . . .                                                                       | 1         |
| 1.3      | Clean data from non-respiratory particles . . . . .                                           | 1         |
| 1.3.1    | Non-biased data . . . . .                                                                     | 2         |
| 1.3.2    | Unplayed sequences . . . . .                                                                  | 2         |
| 1.3.3    | Biased sequences . . . . .                                                                    | 2         |
| 1.3.4    | Compute un-biased sequences . . . . .                                                         | 2         |
| <b>2</b> | <b>Calculate extended measures</b>                                                            | <b>3</b>  |
| <b>3</b> | <b>Rename and re-order entries</b>                                                            | <b>3</b>  |
| <b>4</b> | <b>Descriptive analysis</b>                                                                   | <b>4</b>  |
| 4.1      | Particle distributions . . . . .                                                              | 4         |
| 4.2      | Compute medians (of medians) . . . . .                                                        | 6         |
| 4.3      | Combine group medians with that from professional singers . . . . .                           | 7         |
| 4.4      | $P_N$ for all test conditions (incl. data from professional singers) . . . . .                | 8         |
| 4.5      | Sound pressure level . . . . .                                                                | 12        |
| 4.6      | $P_N/p$ . . . . .                                                                             | 12        |
| 4.7      | Particle volume rate for all test conditions (incl. data from professional singers) . . . . . | 12        |
| <b>5</b> | <b>Confirmatory analysis (Linear-Mixed-Effect-Modeling)</b>                                   | <b>12</b> |
| 5.1      | Experiment 1: Piano and forte . . . . .                                                       | 12        |
| 5.2      | Experiment 2: Playing orchestral excerpt and ‘Ode to the joy’ . . . . .                       | 13        |
| <b>6</b> | <b>Appendix</b>                                                                               | <b>15</b> |
| 6.1      | Minimum, maximum, and median values for all conditions (based on group medians) . . . . .     | 15        |

|       |                                        |    |
|-------|----------------------------------------|----|
| 6.1.1 | $P_N$ values . . . . .                 | 15 |
| 6.1.2 | $P_N/p$ values . . . . .               | 15 |
| 6.2   | Packages used for this study . . . . . | 15 |

# 1 Definitions

## 1.1 Read data

Set working directory according to your file hierarchy. The file “data.csv” is part of the supplemental data.

```
rm(list = ls())
winds.data <- read.csv('data.csv')
singers.data.medians <- read.csv('data_sci_reports_muerbe_2021_medians.csv')
# singers.data.medians$PVR <- NULL
system('rm -f Schumann_Fig*.jpg Schumann_Fig*.pdf Schumann_Tab*.*')
```

## 1.2 Load routines

```
##
## Attache Paket: 'rstatix'
## Das folgende Objekt ist maskiert 'package:stats':
##
##      filter
```

## 1.3 Clean data from non-respiratory particles

We defined non-respiratory particles as “bias”, which was provoked in additional tasks where the participants played the orchestral excerpts and ‘Ode to the joy’ by moving their fingers only and without any air flow into the instrument driven by the mouth (unplayed sequences).

### 1.3.1 Non-biased data

```
winds.data.ready <- dplyr::filter(winds.data,
                                   (Condition == 'piano' |
                                    Condition == 'forte' |
                                    Condition == 'breathing' |
                                    Condition == 'speaking'))
```

### 1.3.2 Unplayed sequences

```
winds.data.unplayed <- dplyr::filter(winds.data,
                                      (Condition == 'orchestral_excerpt_unplayed' |
                                       Condition == 'ode_unplayed' ))
```

### 1.3.3 Biased sequences

```
winds.data.played <- dplyr::filter(winds.data,
                                    (Condition == 'orchestral_excerpt_played' |
                                     Condition == 'ode_played'))
```

### 1.3.4 Compute un-biased sequences

```
winds.data.played$PM_0.3_0.5um <- winds.data.played$PM_0.3_0.5um-
                                winds.data.unplayed$PM_0.3_0.5um
winds.data.played$PM_0.5_1.0um <- winds.data.played$PM_0.5_1.0um-
                                winds.data.unplayed$PM_0.5_1.0um
winds.data.played$PM_1.0_3.0um <- winds.data.played$PM_1.0_3.0um-
                                winds.data.unplayed$PM_1.0_3.0um
winds.data.played$PM_3.0_5.0um <- winds.data.played$PM_3.0_5.0um-
                                winds.data.unplayed$PM_3.0_5.0um
winds.data.played$PM_5.0_10.0um <- winds.data.played$PM_5.0_10.0um-
                                winds.data.unplayed$PM_5.0_10.0um

winds.data.played$PM_0.3_0.5um[winds.data.played$PM_0.3_0.5um<0] <- 0
winds.data.played$PM_0.5_1.0um[winds.data.played$PM_0.5_1.0um<0] <- 0
winds.data.played$PM_1.0_3.0um[winds.data.played$PM_1.0_3.0um<0] <- 0
winds.data.played$PM_3.0_5.0um[winds.data.played$PM_3.0_5.0um<0] <- 0
winds.data.played$PM_5.0_10.0um[winds.data.played$PM_5.0_10.0um<0] <- 0

col1 <- match("PM_0.3_0.5um",names(winds.data.played))
col2 <- match("PM_5.0_10.0um",names(winds.data.played))
winds.data.played$PM <- rowSums( winds.data.played[,col1:col2])

percentages <- colSums( winds.data.played[,col1:col2])
percentages_cumsum <- cumsum(percentages/sum(percentages)*100)

winds.data.aggregated = plyr::join(winds.data.played, winds.data.ready, type = "full")

## Joining by: ID, Instrument, Condition, PM, SPL, PM_0.3_0.5um, PM_0.5_1.0um, PM_1.0_3.0um, PM_3.0_5.0um
rm(winds.data,
   winds.data.ready,
   winds.data.played,
   winds.data.unplayed)
```

## 2 Calculate extended measures

```
# shift PM (avoid NaN after log-transform)

winds.data.aggregated$shift.PM <-
                                winds.data.aggregated$PM+
                                winds.data.aggregated$Accuracy.PM

# log-transform PM
winds.data.aggregated$log.PM <- log10(winds.data.aggregated$shift.PM)

# compute acoustic pressure p
winds.data.aggregated$p <- (10^((winds.data.aggregated$SPL)/20))*2e-5
```

```
# compute PM/p
winds.data.aggregated$PM2p <- winds.data.aggregated$PM/
                                winds.data.aggregated$p
```

### 3 Rename and re-order entries

```
winds.data.aggregated$Condition[
  winds.data.aggregated$Condition ==
    'ode_played'] <- 'Ode'
winds.data.aggregated$Condition[
  winds.data.aggregated$Condition ==
    'orchestral_excerpt_played'] <- 'orchestral_excerpt'

winds.data.aggregated$Condition <- factor(winds.data.aggregated$Condition,
                                           levels = c('breathing',
                                                       'speaking',
                                                       'piano',
                                                       'forte',
                                                       'Ode',
                                                       'orchestral_excerpt'))
winds.data.aggregated$Instrument <- factor(winds.data.aggregated$Instrument,
                                           levels = c('flute',
                                                       'oboe',
                                                       'trumpet',
                                                       'clarinette'))

write.csv(winds.data.aggregated, "data_aggregated.csv", row.names = FALSE)
```

## 4 Descriptive analysis

### 4.1 Particle distributions

```
size_classes <- c(0.3, 0.5, 1.0, 3.0, 5.0, 10., 25.)
no_of_trials <- 5
dlogD = data.frame(log10(size_classes[2:6]) - log10(size_classes[1:5]))
dlogD <- dlogD * length(unique(winds.data.aggregated$ID)) * no_of_trials
size_categories <- c('C1', 'C2', 'C3', 'C4', 'C5') %>% data.frame()
names(dlogD) <- 'dlogD'
names(size_categories) <- 'size_categories'

winds.data.aggregated.classes <- winds.data.aggregated %>% dplyr::select(
  Instrument,
  Condition,
  PM_0.3_0.5um,
  PM_0.5_1.0um,
  PM_1.0_3.0um,
  PM_3.0_5.0um,
  PM_5.0_10.0um
)
```

```

winds.data.aggregated.classes.mean_eb.flute <- calc_mean_eb(list(
  'data'=winds.data.aggregated.classes,
  'size_categories'=size_categories),
  'flute')

winds.data.aggregated.classes.mean_eb.oboe <- calc_mean_eb(list(
  'data'=winds.data.aggregated.classes,
  'size_categories'=size_categories),
  'oboe')

winds.data.aggregated.classes.mean_eb.clarinette <- calc_mean_eb(list(
  'data'=winds.data.aggregated.classes,
  'size_categories'=size_categories),
  'clarinette')

winds.data.aggregated.classes.mean_eb.trumpet <- calc_mean_eb(list(
  'data'=winds.data.aggregated.classes,
  'size_categories'=size_categories),
  'trumpet')

p01 <- plotID_dist_bar(winds.data.aggregated.classes.mean_eb.flute,
  "Flute", "$P_N$ in P/s",
  "",
  c(1,10000))

## Scale for y is already present.
## Adding another scale for y, which will replace the existing scale.
p02 <- plotID_dist_bar(winds.data.aggregated.classes.mean_eb.oboe,
  "Oboe", "",
  "",
  c(1,10000))

## Scale for y is already present.
## Adding another scale for y, which will replace the existing scale.
p03 <- plotID_dist_bar(winds.data.aggregated.classes.mean_eb.clarinette,
  "Clarinette", "$P_N$ in P/s",
  "Particle diameter $(D_p)$ in $\mu\text{m}$",
  c(1,10000))

## Scale for y is already present.
## Adding another scale for y, which will replace the existing scale.
p04 <- plotID_dist_bar(winds.data.aggregated.classes.mean_eb.trumpet,
  "Trumpet", "",
  "Particle diameter $(D_p)$ in $\mu\text{m}$",
  c(1,10000))

## Scale for y is already present.
## Adding another scale for y, which will replace the existing scale.
p0 <- gridExtra::grid.arrange(p01,p02,p03,p04,nrow=2)

```

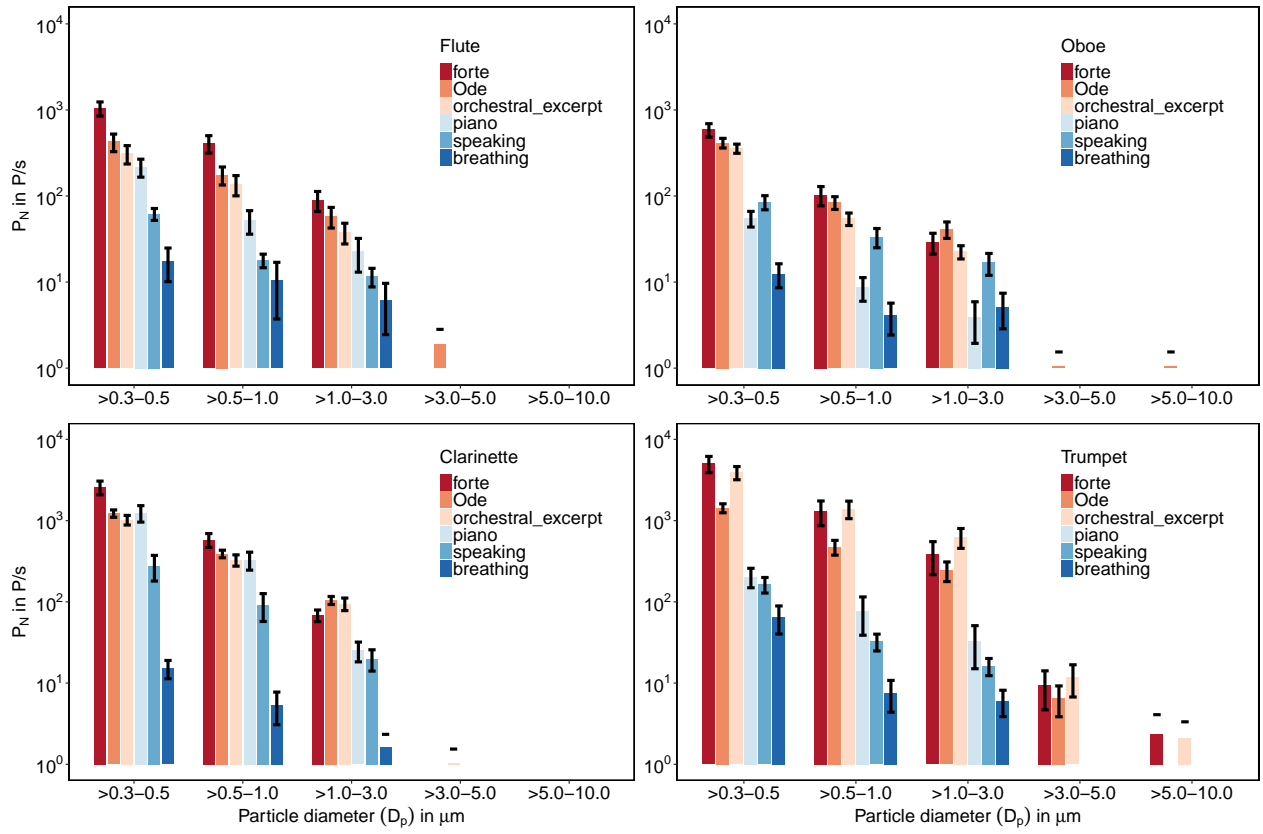

Figure 1: Particle distributions.

```

ggsave(
  "./Schumann_Fig2.pdf",
  device=cairo_pdf,
  plot = p0,
  width = plot_x,
  height = plot_y,
  units = c("in"),
  dpi = 600,
)

ggsave(
  "./Schumann_Fig2.jpg",
  plot = p0,
  width = plot_x,
  height = plot_y,
  units = c("in"),
  dpi = 600,
)

```

## 4.2 Compute medians (of medians)

```

library(dplyr)

##
## Attache Paket: 'dplyr'
## Die folgenden Objekte sind maskiert von 'package:stats':
##
##   filter, lag
## Die folgenden Objekte sind maskiert von 'package:base':
##
##   intersect, setdiff, setequal, union

winds.data.aggregated.medians.1 = aggregate(SPL ~
                                             ID+Condition, winds.data.aggregated, median)
winds.data.aggregated.medians.2 = aggregate(Instrument ~
                                             ID+Condition, winds.data.aggregated, first)

winds.data.aggregated.medians.5 = aggregate(PM ~
                                             ID+Condition, winds.data.aggregated, median)
winds.data.aggregated.medians.6 = aggregate(PM2p ~
                                             ID+Condition, winds.data.aggregated, median)

winds.data.aggregated.medians.7 = aggregate(PVR ~
                                             ID+Condition, winds.data.aggregated, median)

winds.data.aggregated.medians = plyr::join(winds.data.aggregated.medians.1,
                                           winds.data.aggregated.medians.2,
                                           type = "inner")

## Joining by: ID, Condition

```

```
winds.data.aggregated.medians = plyr::join(winds.data.aggregated.medians,
                                           winds.data.aggregated.medians.5,
                                           type = "inner")
```

## Joining by: ID, Condition

```
winds.data.aggregated.medians = plyr::join(winds.data.aggregated.medians,
                                           winds.data.aggregated.medians.6,
                                           type = "inner")
```

## Joining by: ID, Condition

```
winds.data.aggregated.medians = plyr::join(winds.data.aggregated.medians,
                                           winds.data.aggregated.medians.7,
                                           type = "inner")
```

## Joining by: ID, Condition

```
rm(winds.data.aggregated.medians.1,
   winds.data.aggregated.medians.2,
   winds.data.aggregated.medians.5,
   winds.data.aggregated.medians.6,
   winds.data.aggregated.medians.7
)
```

### 4.3 Combine group medians with that from professional singers

```
winds.data.aggregated.medians.wisi <- winds.data.aggregated.medians
winds.data.aggregated.medians.wisi$SPL <- NULL
winds.data.aggregated.medians.wisi$PM2p <- NULL
winds.data.aggregated.medians.wisi <- rbind(winds.data.aggregated.medians.wisi,
                                             singers.data.medians)
```

```
winds.data.aggregated.medians.wisi$Condition <-
  as.character(winds.data.aggregated.medians.wisi$Condition)
winds.data.aggregated.medians.wisi$Condition[
  winds.data.aggregated.medians.wisi$Condition ==
    'orchestral_excerpt'] <- 'o.e./Song'
```

```
winds.data.aggregated.medians.wisi$Instrument <-
  as.character(winds.data.aggregated.medians.wisi$Instrument)
winds.data.aggregated.medians.wisi$Instrument[
  winds.data.aggregated.medians.wisi$Instrument != 'Singer' &
    (winds.data.aggregated.medians.wisi$Condition == 'breathing' |
     winds.data.aggregated.medians.wisi$Condition == 'speaking')
  ] <- 'All participants'
```

```
winds.data.aggregated.medians.wisi$Condition <-
  factor(winds.data.aggregated.medians.wisi$Condition,
         levels = c('breathing',
                    'speaking',
                    'piano',
                    'forte',
                    'Ode',
```



```

                                'o.e./Song'))
winds.data.aggregated.medians.wisi$Instrument <-
  factor(winds.data.aggregated.medians.wisi$Instrument,
         levels = c('flute',
                     'oboe',
                     'trumpet',
                     'clarinette',
                     'Singer',
                     'All participants'))

```

#### 4.4 $P_N$ for all test conditions (incl. data from professional singers)

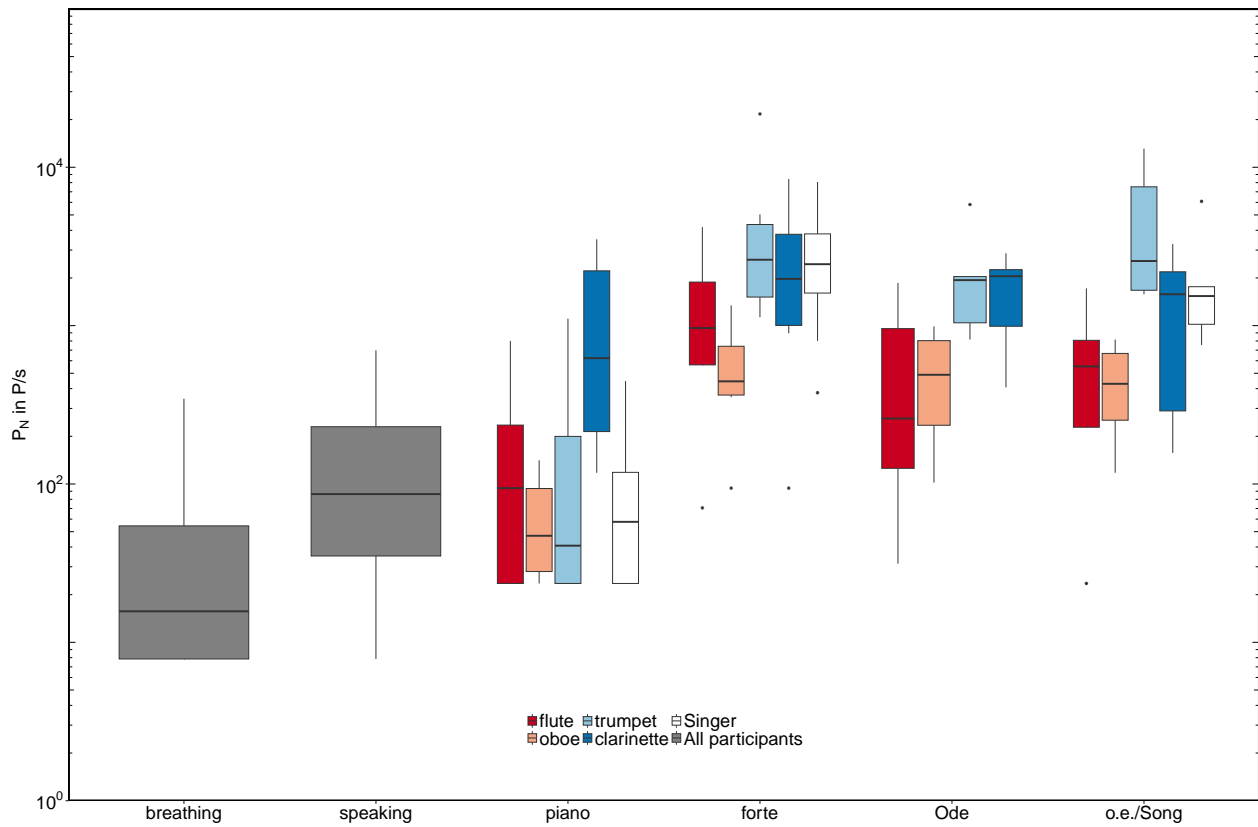

Figure 2: Boxplot of  $P_N$  for all participants (based on group medians of (mostly) five replications of each task (respiratoric emitted particles only)). Values for singers were adapted from the supplemental information from Mürbe et al (2021), <https://doi.org/10.1038/s41598-021-93281-x>

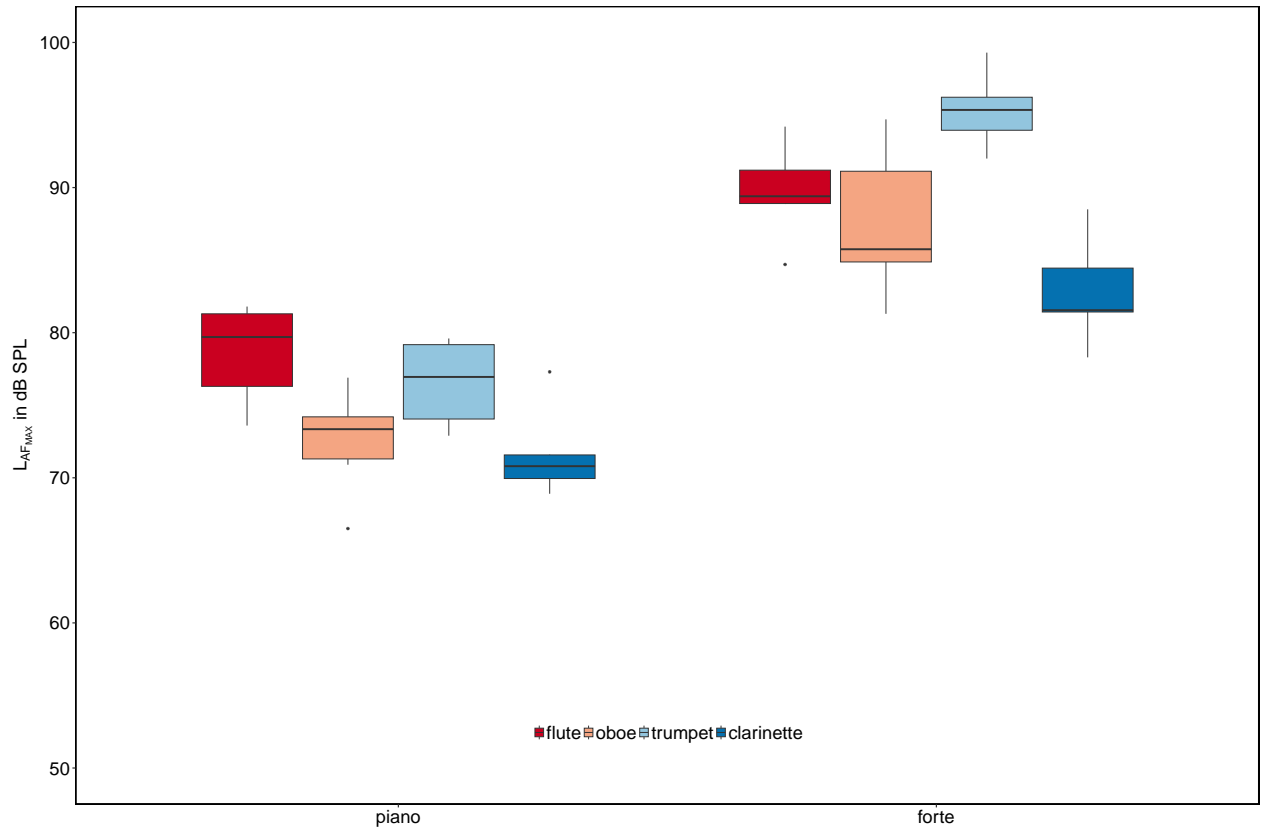

Figure 3: Boxplot of the sound pressure level  $L_{AF_{MAX}}$  for all participants (based on medians of five replications of each task).

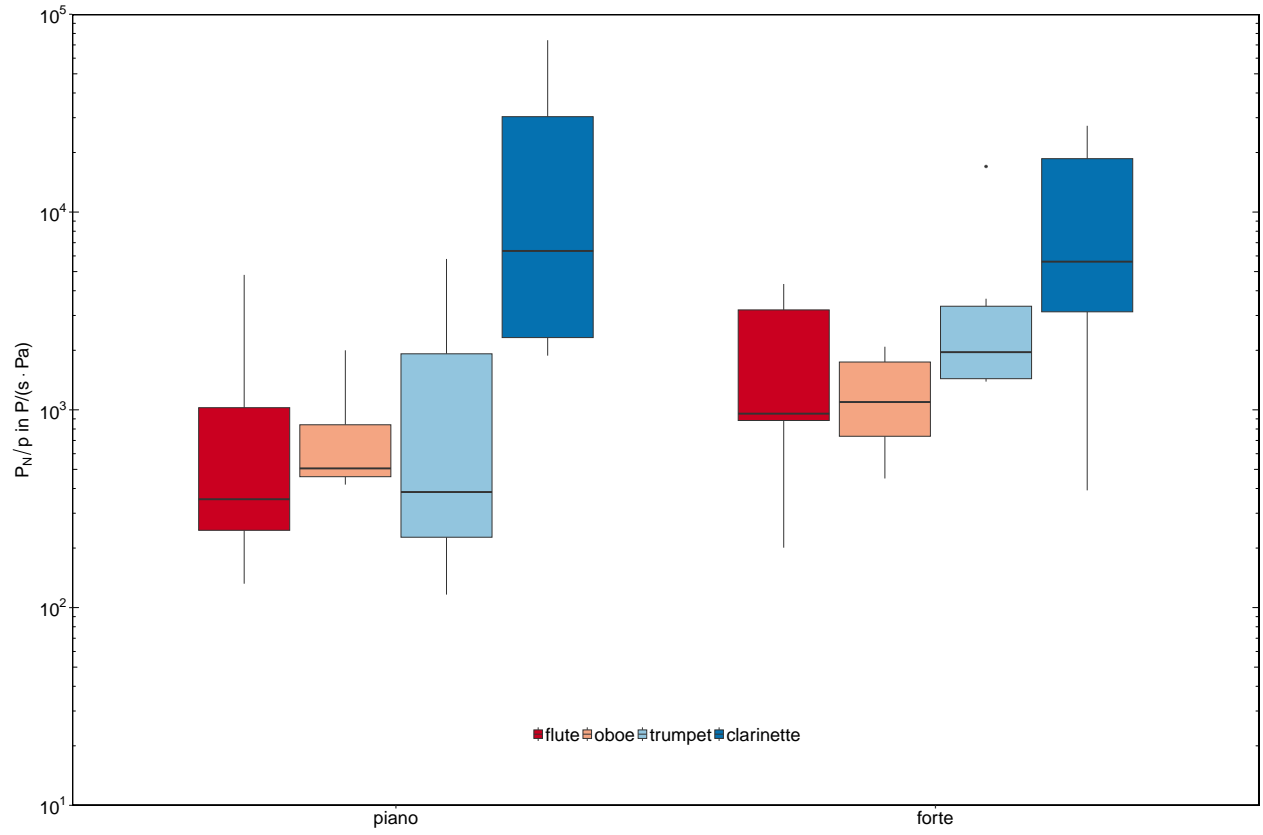

Figure 4: Boxplot of  $P_N$  related to the acoustic pressure  $p = 10^{L_{AFMAX}/20} \cdot 2 \times 10^{-5}$  Pa for all participants (based on medians of five replications of each task).

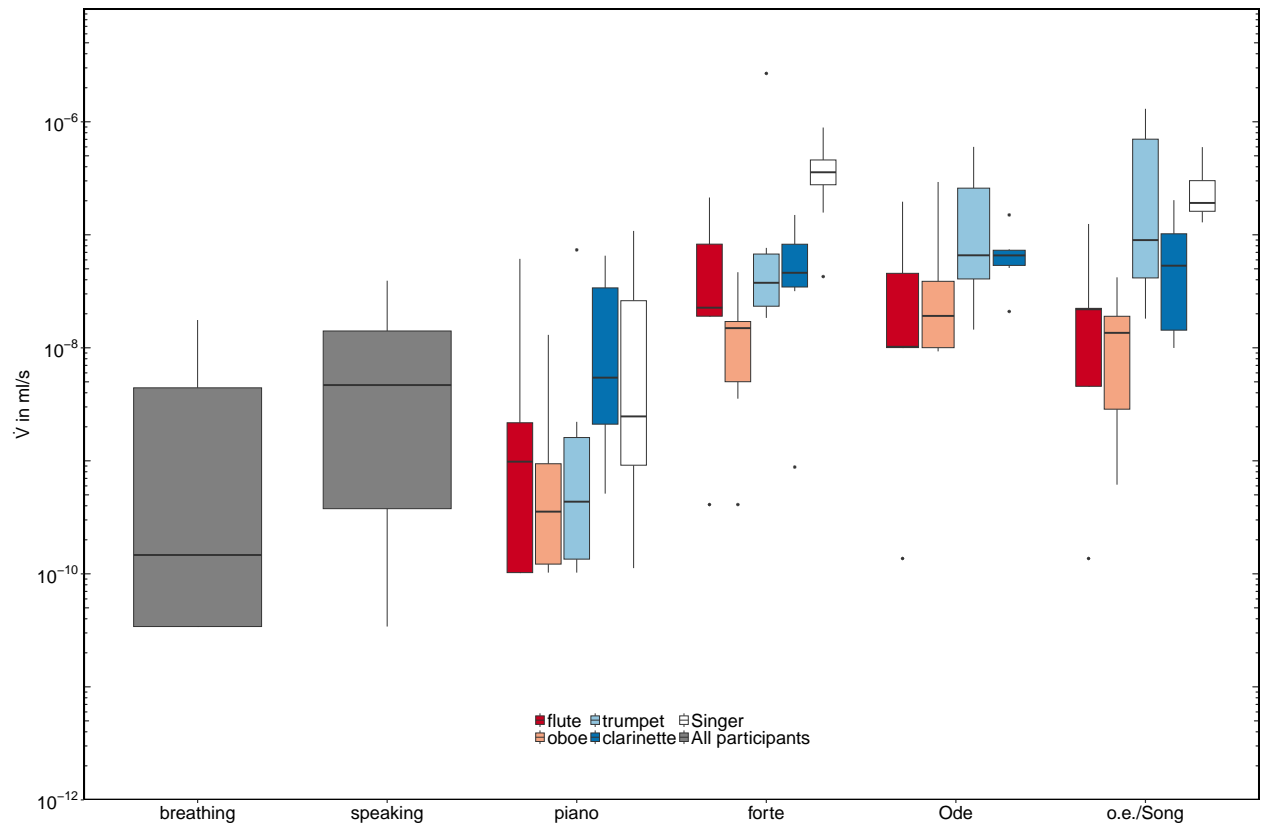

Figure 5: Boxplot of Particle Volume Rate  $\dot{V}$  for all participants (based on group medians of (mostly) five replications of each task (respiratoric emitted particles only)). Values for singers were adapted from the supplemental information from Mürbe et al (2021), <https://doi.org/10.1038/s41598-021-93281-x>

#### 4.5 Sound pressure level

#### 4.6 $P_N/p$

#### 4.7 Particle volume rate for all test conditions (incl. data from professional singers)

### 5 Confirmatory analysis (Linear-Mixed-Effect-Modeling)

#### 5.1 Experiment 1: Piano and forte

```
model.winds.data.aggregated.log.PM.pifo <-  
  lmerTest::lmer(log.PM~Instrument+Condition  
    +(1|ID),  
    winds.data.aggregated.pifo,  
    REML=TRUE)  
jtools::summ(model.winds.data.aggregated.log.PM.pifo, digits = 3)
```

|                    |                                 |
|--------------------|---------------------------------|
| Observations       | 230                             |
| Dependent variable | log.PM                          |
| Type               | Mixed effects linear regression |

|                                       |         |
|---------------------------------------|---------|
| AIC                                   | 267.317 |
| BIC                                   | 291.384 |
| Pseudo-R <sup>2</sup> (fixed effects) | 0.431   |
| Pseudo-R <sup>2</sup> (total)         | 0.795   |

| Fixed Effects        |        |       |        |         |       |
|----------------------|--------|-------|--------|---------|-------|
|                      | Est.   | S.E.  | t val. | d.f.    | p     |
| (Intercept)          | 2.107  | 0.221 | 9.515  | 19.441  | 0.000 |
| Instrumentoboe       | -0.265 | 0.298 | -0.888 | 19.000  | 0.386 |
| Instrumenttrumpet    | 0.286  | 0.298 | 0.958  | 19.000  | 0.350 |
| Instrumentclarinette | 0.488  | 0.298 | 1.637  | 19.000  | 0.118 |
| Conditionforte       | 0.862  | 0.047 | 18.220 | 206.000 | 0.000 |

p values calculated using Satterthwaite d.f.

| Random Effects |             |           |
|----------------|-------------|-----------|
| Group          | Parameter   | Std. Dev. |
| ID             | (Intercept) | 0.479     |
| Residual       |             | 0.359     |

| Grouping Variables |          |       |
|--------------------|----------|-------|
| Group              | # groups | ICC   |
| ID                 | 23       | 0.641 |

## 5.2 Experiment 2: Playing orchestral excerpt and ‘Ode to the joy’

```
model.winds.data.aggregated.log.PM.pl <-
  lmerTest::lmer(log.PM~Instrument+Condition
    +(1|ID),
  winds.data.aggregated.pl,
  REML=TRUE)

jtools::summ(model.winds.data.aggregated.log.PM.pl, digits = 3)
```

|                    |                                 |
|--------------------|---------------------------------|
| Observations       | 230                             |
| Dependent variable | log.PM                          |
| Type               | Mixed effects linear regression |

|                                       |         |
|---------------------------------------|---------|
| AIC                                   | 164.806 |
| BIC                                   | 188.873 |
| Pseudo-R <sup>2</sup> (fixed effects) | 0.364   |
| Pseudo-R <sup>2</sup> (total)         | 0.842   |

| Fixed Effects               |        |       |        |         |       |
|-----------------------------|--------|-------|--------|---------|-------|
|                             | Est.   | S.E.  | t val. | d.f.    | p     |
| (Intercept)                 | 2.285  | 0.222 | 10.293 | 19.265  | 0.000 |
| Instrumentoboe              | 0.309  | 0.300 | 1.030  | 19.000  | 0.316 |
| Instrumenttrumpet           | 1.125  | 0.300 | 3.754  | 19.000  | 0.001 |
| Instrumentclarinette        | 0.772  | 0.300 | 2.578  | 19.000  | 0.018 |
| Conditionorchestral_excerpt | -0.040 | 0.037 | -1.085 | 206.000 | 0.279 |

p values calculated using Satterthwaite d.f.

| Random Effects |             |           |
|----------------|-------------|-----------|
| Group          | Parameter   | Std. Dev. |
| ID             | (Intercept) | 0.487     |
| Residual       |             | 0.280     |

| Grouping Variables |          |       |
|--------------------|----------|-------|
| Group              | # groups | ICC   |
| ID                 | 23       | 0.752 |

Table 1:  $P_N$  - Values for piano (left) and forte (right) in P/s

| ID         | Min    | Median  | Max     | ID         | Min     | Median   | Max      |
|------------|--------|---------|---------|------------|---------|----------|----------|
| flute      | 23.54  | 94.170  | 800.47  | flute      | 70.63   | 965.270  | 4190.67  |
| oboe       | 23.54  | 47.090  | 141.26  | oboe       | 94.17   | 447.320  | 1341.96  |
| trumpet    | 23.54  | 47.085  | 1106.53 | trumpet    | 1130.07 | 2613.285 | 21706.75 |
| clarinette | 117.72 | 647.435 | 3507.92 | clarinette | 94.17   | 2083.565 | 8428.43  |

Table 2:  $P_N$  - Values for Ode to joy (left) and orchestral excerpt (right) in P/s

| ID         | Min    | Median   | Max     | ID         | Min     | Median   | Max      |
|------------|--------|----------|---------|------------|---------|----------|----------|
| flute      | 31.39  | 258.970  | 1859.91 | flute      | 0.00    | 486.560  | 1718.65  |
| oboe       | 102.03 | 490.485  | 988.80  | oboe       | 117.71  | 431.635  | 816.16   |
| trumpet    | 816.17 | 1938.380 | 5815.15 | trumpet    | 1577.39 | 2648.595 | 13105.67 |
| clarinette | 408.08 | 2052.175 | 2864.41 | clarinette | 156.96  | 1640.170 | 3280.34  |

Table 3:  $P_N$  - Values for breathing (left) and speaking (right) in P/s

| ID               | Min  | Median | Max   | ID               | Min  | Median | Max    |
|------------------|------|--------|-------|------------------|------|--------|--------|
| All participants | 7.85 | 15.7   | 345.3 | All participants | 7.85 | 86.32  | 698.45 |

Table 4:  $P_N/p$  - Values for piano (left) and forte (right) in P/(s·Pa)

| ID         | Min      | Median   | Max       | ID         | Min      | Median   | Max       |
|------------|----------|----------|-----------|------------|----------|----------|-----------|
| flute      | 132.062  | 353.150  | 4811.883  | flute      | 200.890  | 956.353  | 4328.343  |
| oboe       | 418.696  | 507.995  | 1999.527  | oboe       | 449.658  | 1096.508 | 2084.889  |
| trumpet    | 116.353  | 396.100  | 5793.396  | trumpet    | 1389.045 | 2030.090 | 17004.537 |
| clarinette | 1879.270 | 8123.827 | 73963.880 | clarinette | 391.636  | 6154.405 | 27305.710 |

## 6 Appendix

### 6.1 Minimum, maximum, and median values for all conditions (based on group medians)

#### 6.1.1 $P_N$ values

#### 6.1.2 $P_N/p$ values

### 6.2 Packages used for this study

```
sessionInfo()
```

```
## R version 4.3.1 (2023-06-16)
## Platform: x86_64-pc-linux-gnu (64-bit)
## Running under: Ubuntu 20.04.6 LTS
##
## Matrix products: default
## BLAS: /usr/lib/x86_64-linux-gnu/blas/libblas.so.3.9.0
## LAPACK: /usr/lib/x86_64-linux-gnu/lapack/liblapack.so.3.9.0
##
## locale:
##  [1] LC_CTYPE=de_DE.UTF-8      LC_NUMERIC=C
##  [3] LC_TIME=en_GB.UTF-8      LC_COLLATE=de_DE.UTF-8
##  [5] LC_MONETARY=en_GB.UTF-8  LC_MESSAGES=de_DE.UTF-8
##  [7] LC_PAPER=en_GB.UTF-8     LC_NAME=C
##  [9] LC_ADDRESS=C             LC_TELEPHONE=C
## [11] LC_MEASUREMENT=en_GB.UTF-8 LC_IDENTIFICATION=C
##
## time zone: Europe/Berlin
## tzcode source: system (glibc)
##
## attached base packages:
## [1] stats      graphics  grDevices  utils      datasets  methods   base
##
## other attached packages:
## [1] dplyr_1.1.2    rstatix_0.7.2  xtable_1.8-4  forcats_1.0.0
## [5] latex2exp_0.9.6 ggplot2_3.4.2  scales_1.2.1  tidyr_1.3.0
##
## loaded via a namespace (and not attached):
##  [1] tidyselect_1.2.0    viridisLite_0.4.2  farver_2.1.1
##  [4] fastmap_1.1.1      janitor_2.2.0      jtools_2.2.2
##  [7] promises_1.2.0.1    digest_0.6.33      timechange_0.2.0
## [10] mime_0.12           lifecycle_1.0.3    ellipsis_0.3.2
## [13] processx_3.8.2      magrittr_2.0.3     compiler_4.3.1
## [16] rlang_1.1.1         tools_4.3.1        plotrix_3.8-2
## [19] utf8_1.2.3          yaml_2.3.7         data.table_1.14.8
## [22] knitr_1.43          prettyunits_1.1.1  labeling_0.4.2
## [25] htmlwidgets_1.6.2  pkgbuild_1.4.2     curl_5.0.1
## [28] xml2_1.3.5          plyr_1.8.8         pkgload_1.3.2.1
## [31] abind_1.4-5         miniUI_0.1.1.1     numDeriv_2016.8-1.1
## [34] withr_2.5.0         purrr_1.0.1        grid_4.3.1
## [37] fansi_1.0.4         urlchecker_1.0.1   profvis_0.3.8
## [40] colorspace_2.1-0    MASS_7.3-60        cli_3.6.1
## [43] rmarkdown_2.23     crayon_1.5.2       ragg_1.2.5
```



|                        |                   |                       |
|------------------------|-------------------|-----------------------|
| ## [46] generics_0.1.3 | remotes_2.4.2.1   | rstudioapi_0.15.0     |
| ## [49] httr_1.4.6     | sessioninfo_1.2.2 | minqa_1.2.5           |
| ## [52] cachem_1.0.8   | pander_0.6.5      | stringr_1.5.0         |
| ## [55] splines_4.3.1  | rvest_1.0.3       | vctrs_0.6.3           |
| ## [58] devtools_2.4.5 | webshot_0.5.5     | Matrix_1.6-0          |
| ## [61] boot_1.3-28    | carData_3.0-5     | car_3.1-2             |
| ## [64] callr_3.7.3    | systemfonts_1.0.4 | glue_1.6.2            |
| ## [67] nloptr_2.0.3   | ps_1.7.5          | lubridate_1.9.2       |
| ## [70] stringi_1.7.12 | gtable_0.3.3      | later_1.3.0           |
| ## [73] lme4_1.1-34    | lmerTest_3.1-3    | munsell_0.5.0         |
| ## [76] tibble_3.2.1   | pillar_1.9.0      | htmltools_0.5.5       |
| ## [79] R6_2.5.1       | textshaping_0.3.6 | kableExtra_1.3.4.9000 |
| ## [82] evaluate_0.21  | shiny_1.7.3       | lattice_0.21-8        |
| ## [85] highr_0.10     | backports_1.4.1   | memoise_2.0.1         |
| ## [88] broom_1.0.5    | snakecase_0.11.0  | httpuv_1.6.6          |
| ## [91] Rcpp_1.0.11    | svglite_2.1.1     | gridExtra_2.3         |
| ## [94] nlme_3.1-162   | xfun_0.39         | fs_1.6.3              |
| ## [97] usethis_2.2.2  | pkgconfig_2.0.3   |                       |
