# Supplementary material for: Investigation of the Emission Rate of Particles when Musicians Play Wind, Woodwind, and Brass Instruments
Source: Hindawi journal article supplement (doi:10.1155/2023/8092828), 2023-12-21
Supplement: f8 [file 8092828.f8.zip]

Archive with 6 entries (6 files):
- data_aggregated.csv
- data_sci_reports_muerbe_2021_medians.csv
- lib.R
- Schumann_2021_winds_Indoor_Air_data_analysis.pdf
- Schumann_2021_winds_Indoor_Air_data_analysis.Rmd
- data.csv
