# Supplementary material for: Investigation of the Emission Rate of Particles when Musicians Play Wind, Woodwind, and Brass Instruments
Source: Hindawi journal article supplement (doi:10.1155/2023/8092828), 2023-12-21
Supplement: f8 [file 8092828.f8.zip › data.csv]

ID	Instrument	Condition	PM	SPL	PM_0.3_0.5um	PM_0.5_1.0um	PM_1.0_3.0um	PM_3.0_5.0um	PM_5.0_10.0um	Accuracy.PM	RH	R.ev	PVR
S1	flute	breathing	0	62.2	0	0	0	0	0	7.85	0.35	5.065797019100886	0
S1	flute	breathing	0	62.2	0	0	0	0	0	7.85	0.35	5.065797019100886	0
S1	flute	breathing	0	62.2	0	0	0	0	0	7.85	0.35	5.065797019100886	0
S1	flute	breathing	0	62.2	0	0	0	0	0	7.85	0.35	5.065797019100886	0
S1	flute	breathing	nan	62.2						7.85	0.35	5.065797019100886
S1	flute	speaking	109.87	74.09999999999999	62.78	39.24	7.85	0	0	7.85	0.35	5.065797019100886	5.673686239691221e-09
S1	flute	speaking	149.11	74.8	94.17	23.54	31.39	0	0	7.85	0.35	5.065797019100886	1.817995408780041e-08
S1	flute	speaking	78.48	75.7	31.39	7.85	39.24	0	0	7.85	0.35	5.065797019100886	2.172915461956475e-08
S1	flute	speaking	102.02	75.3	78.48	23.54	0	0	0	7.85	0.35	5.065797019100886	1.017939611444995e-09
S1	flute	speaking	23.54	76.59999999999999	7.85	0	15.7	0	0	7.85	0.35	5.065797019100886	8.581007238177709e-09
S1	flute	ode_unplayed	0	61.6	0	0	0	0	0	7.85	0.35	5.065797019100886	0
S1	flute	ode_unplayed	0	63	0	0	0	0	0	7.85	0.35	5.065797019100886	0
S1	flute	ode_unplayed	0	61.9	0	0	0	0	0	7.85	0.35	5.065797019100886	0
S1	flute	ode_unplayed	7.85	63.2	7.85	0	0	0	0	7.85	0.35	5.065797019100886	3.418727983337734e-11
S1	flute	ode_unplayed	0	62	0	0	0	0	0	7.85	0.35	5.065797019100886	0
S1	flute	ode_played	180.5	84.59999999999999	125.56	23.54	31.39	0	0	7.85	0.35	5.065797019100886	1.831670320713392e-08
S1	flute	ode_played	360.99	86.2	180.5	117.72	62.78	0	0	7.85	0.35	5.065797019100886	3.835392133510112e-08
S1	flute	ode_played	109.87	87.7	62.78	47.09	0	0	0	7.85	0.35	5.065797019100886	1.625631864889462e-09
S1	flute	ode_played	133.41	87	70.63	47.09	15.7	0	0	7.85	0.35	5.065797019100886	1.020663910306717e-08
S1	flute	ode_played	47.09	88.2	15.7	23.54	7.85	0	0	7.85	0.35	5.065797019100886	5.017851351950142e-09
S1	flute	orchestral_excerpt_unplayed	15.7	62.4	15.7	0	0	0	0	7.85	0.35	5.065797019100886	6.837455966675468e-11
S1	flute	orchestral_excerpt_unplayed	0	62.3	0	0	0	0	0	7.85	0.35	5.065797019100886	0
S1	flute	orchestral_excerpt_unplayed	0	62.2	0	0	0	0	0	7.85	0.35	5.065797019100886	0
S1	flute	orchestral_excerpt_unplayed	23.54	62.3	23.54	0	0	0	0	7.85	0.35	5.065797019100886	1.02561839500132e-10
S1	flute	orchestral_excerpt_unplayed	0	61.4	0	0	0	0	0	7.85	0.35	5.065797019100886	0
S1	flute	orchestral_excerpt_played	0	96.59999999999999	0	0	0	0	0	7.85	0.35	5.065797019100886	0
S1	flute	orchestral_excerpt_played	31.39	96.90000000000001	15.7	7.85	7.85	0	0	7.85	0.35	5.065797019100886	4.567140143209328e-09
S1	flute	orchestral_excerpt_played	15.7	97.90000000000001	15.7	0	0	0	0	7.85	0.35	5.065797019100886	6.837455966675468e-11
S1	flute	orchestral_excerpt_played	47.09	96.09999999999999	23.54	7.85	15.7	0	0	7.85	0.35	5.065797019100886	8.874737402214871e-09
S1	flute	orchestral_excerpt_played	39.24	96.90000000000001	23.54	7.85	7.85	0	0	7.85	0.35	5.065797019100886	4.601327423042705e-09
S1	flute	piano	70.63	80	70.63	0	0	0	0	23.54	0.35	5.065797019100886	3.076855185003961e-10
S1	flute	piano	70.63	83.2	70.63	0	0	0	0	23.54	0.35	5.065797019100886	3.076855185003961e-10
S1	flute	piano	23.54	79	23.54	0	0	0	0	23.54	0.35	5.065797019100886	1.02561839500132e-10
S1	flute	piano	0	79.7	0	0	0	0	0	23.54	0.35	5.065797019100886	0
S1	flute	piano	0	78.90000000000001	0	0	0	0	0	23.54	0.35	5.065797019100886	0
S1	flute	forte	400.23	88.7	235.43	164.8	0	0	0	23.54	0.35	5.065797019100886	5.758086086779872e-09
S1	flute	forte	776.92	90.7	517.95	235.43	23.54	0	0	23.54	0.35	5.065797019100886	2.183725853763162e-08
S1	flute	forte	894.64	86.09999999999999	659.21	164.8	70.63	0	0	23.54	0.35	5.065797019100886	4.606488901033174e-08
S1	flute	forte	565.03	90.09999999999999	400.23	141.26	23.54	0	0	23.54	0.35	5.065797019100886	1.862018208768607e-08
S1	flute	forte	400.23	89.40000000000001	188.34	188.34	23.54	0	0	23.54	0.35	5.065797019100886	1.904925915840733e-08
S2	flute	breathing	15.7	62.7	15.7	0	0	0	0	7.85	0.35	5.065797019100886	6.837455966675468e-11
S2	flute	breathing	0	62.7	0	0	0	0	0	7.85	0.35	5.065797019100886	0
S2	flute	breathing	0	62.7	0	0	0	0	0	7.85	0.35	5.065797019100886	0
S2	flute	breathing	0	62.7	0	0	0	0	0	7.85	0.35	5.065797019100886	0
S2	flute	breathing	nan	62.7						7.85	0.35	5.065797019100886
S2	flute	speaking	86.31999999999999	65.90000000000001	62.78	15.7	0	0	7.85	7.85	0.35	5.065797019100886	2.260798138178149e-07
S2	flute	speaking	188.34	63.9	164.8	15.7	7.85	0	0	7.85	0.35	5.065797019100886	5.442054064413905e-09
S2	flute	speaking	47.09	66.8	39.24	0	7.85	0	0	7.85	0.35	5.065797019100886	4.444346378339053e-09
S2	flute	speaking	47.09	66.40000000000001	31.39	15.7	0	0	0	7.85	0.35	5.065797019100886	5.874603280743238e-10
S2	flute	speaking	54.93	65.09999999999999	39.24	15.7	0	0	0	7.85	0.35	5.065797019100886	6.216476079077012e-10
S2	flute	ode_unplayed	0	61.6	0	0	0	0	0	7.85	0.35	5.065797019100886	0
S2	flute	ode_unplayed	15.7	61.8	0	15.7	0	0	0	7.85	0.35	5.065797019100886	4.507112087408144e-10
S2	flute	ode_unplayed	0	62.3	0	0	0	0	0	7.85	0.35	5.065797019100886	0
S2	flute	ode_unplayed	0	61.9	0	0	0	0	0	7.85	0.35	5.065797019100886	0
S2	flute	ode_unplayed	15.7	61.5	15.7	0	0	0	0	7.85	0.35	5.065797019100886	6.837455966675468e-11
S2	flute	ode_played	2283.68	87.90000000000001	1389.04	627.8200000000001	266.82	0	0	7.85	0.35	5.065797019100886	1.69375536171994e-07
S2	flute	ode_played	973.12	87.5	651.36	227.58	94.17	0	0	7.85	0.35	5.065797019100886	6.065377650297812e-08
S2	flute	ode_played	1381.2	86.8	918.1799999999999	408.08	54.93	0	0	7.85	0.35	5.065797019100886	4.563227302197148e-08
S2	flute	ode_played	855.4	87.5	572.88	251.13	31.39	0	0	7.85	0.35	5.065797019100886	2.680069068437824e-08
S2	flute	ode_played	478.71	87.3	345.3	109.87	23.54	0	0	7.85	0.35	5.065797019100886	1.74794487113708e-08
S2	flute	orchestral_excerpt_unplayed	0	62.4	0	0	0	0	0	7.85	0.35	5.065797019100886	0
S2	flute	orchestral_excerpt_unplayed	0	62	0	0	0	0	0	7.85	0.35	5.065797019100886	0
S2	flute	orchestral_excerpt_unplayed	0	61.4	0	0	0	0	0	7.85	0.35	5.065797019100886	0
S2	flute	orchestral_excerpt_unplayed	7.85	63	7.85	0	0	0	0	7.85	0.35	5.065797019100886	3.418727983337734e-11
S2	flute	orchestral_excerpt_unplayed	0	61.9	0	0	0	0	0	7.85	0.35	5.065797019100886	0
S2	flute	orchestral_excerpt_played	627.8200000000001	97	463.01	125.56	39.24	0	0	7.85	0.35	5.065797019100886	2.698978907595661e-08
S2	flute	orchestral_excerpt_played	894.64	96.5	635.66	235.43	23.54	0	0	7.85	0.35	5.065797019100886	2.235006773513228e-08
S2	flute	orchestral_excerpt_played	533.64	97	313.91	188.34	31.39	0	0	7.85	0.35	5.065797019100886	2.386966561491353e-08
S2	flute	orchestral_excerpt_played	729.84	97	510.1	204.04	15.7	0	0	7.85	0.35	5.065797019100886	1.662823886114445e-08
S2	flute	orchestral_excerpt_played	321.76	97.8	180.5	109.87	31.39	0	0	7.85	0.35	5.065797019100886	2.103492581404204e-08
S2	flute	piano	306.06	81.7	211.89	94.17	0	0	0	23.54	0.35	5.065797019100886	3.627323807946075e-09
S2	flute	piano	94.17	82.7	94.17	0	0	0	0	23.54	0.35	5.065797019100886	4.102473580005281e-10
S2	flute	piano	94.17	82.90000000000001	70.63	23.54	0	0	0	23.54	0.35	5.065797019100886	9.837523316116178e-10
S2	flute	piano	517.95	81.8	400.23	47.09	70.63	0	0	23.54	0.35	5.065797019100886	4.155637471027418e-08
S2	flute	piano	70.63	80	70.63	0	0	0	0	23.54	0.35	5.065797019100886	3.076855185003961e-10
S2	flute	forte	447.32	94.40000000000001	423.78	23.54	0	0	0	23.54	0.35	5.065797019100886	2.522179924113598e-09
S2	flute	forte	2189.51	95.09999999999999	1695.1	376.69	117.72	0	0	23.54	0.35	5.065797019100886	8.230267114137154e-08
S2	flute	forte	894.64	93.40000000000001	753.38	117.72	23.54	0	0	23.54	0.35	5.065797019100886	1.948254286707683e-08
S2	flute	forte	965.27	94.2	706.29	235.43	23.54	0	0	23.54	0.35	5.065797019100886	2.265775325363268e-08
S2	flute	forte	1742.19	91.8	1389.04	306.06	47.09	0	0	23.54	0.35	5.065797019100886	4.048047697598667e-08
S3	flute	breathing	23.54	61.6	7.85	0	15.7	0	0	7.85	0.35	5.065797019100886	8.581007238177709e-09
S3	flute	breathing	15.7	61.6	7.85	7.85	0	0	0	7.85	0.35	5.065797019100886	2.595428842037846e-10
S3	flute	breathing	0	61.6	0	0	0	0	0	7.85	0.35	5.065797019100886	0
S3	flute	breathing	7.85	61.6	7.85	0	0	0	0	7.85	0.35	5.065797019100886	3.418727983337734e-11
S3	flute	breathing	nan	61.6						7.85	0.35	5.065797019100886
S3	flute	speaking	31.39	72.09999999999999	31.39	0	0	0	0	7.85	0.35	5.065797019100886	1.367491193335094e-10
S3	flute	speaking	7.85	70.7	7.85	0	0	0	0	7.85	0.35	5.065797019100886	3.418727983337734e-11
S3	flute	speaking	7.85	69.7	7.85	0	0	0	0	7.85	0.35	5.065797019100886	3.418727983337734e-11
S3	flute	speaking	15.7	72.40000000000001	15.7	0	0	0	0	7.85	0.35	5.065797019100886	6.837455966675468e-11
S3	flute	speaking	7.85	71.7	0	7.85	0	0	0	7.85	0.35	5.065797019100886	2.253556043704072e-10
S3	flute	ode_unplayed	0	61.1	0	0	0	0	0	7.85	0.35	5.065797019100886	0
S3	flute	ode_unplayed	7.85	61.3	7.85	0	0	0	0	7.85	0.35	5.065797019100886	3.418727983337734e-11
S3	flute	ode_unplayed	0	61.9	0	0	0	0	0	7.85	0.35	5.065797019100886	0
S3	flute	ode_unplayed	0	60.7	0	0	0	0	0	7.85	0.35	5.065797019100886	0
S3	flute	ode_unplayed	0	62.6	0	0	0	0	0	7.85	0.35	5.065797019100886	0
S3	flute	ode_played	258.97	85.7	125.56	109.87	23.54	0	0	7.85	0.35	5.065797019100886	1.652220487603624e-08
S3	flute	ode_played	0	86.7	0	0	0	0	0	7.85	0.35	5.065797019100886	0
S3	flute	ode_played	266.82	86.09999999999999	172.65	86.31999999999999	7.85	0	0	7.85	0.35	5.065797019100886	7.504441783580947e-09
S3	flute	ode_played	298.21	85.90000000000001	188.34	78.48	31.39	0	0	7.85	0.35	5.065797019100886	2.016769067639379e-08
S3	flute	ode_played	141.26	86.8	86.31999999999999	39.24	15.7	0	0	7.85	0.35	5.065797019100886	1.004965805836352e-08
S3	flute	orchestral_excerpt_unplayed	0	61.5	0	0	0	0	0	7.85	0.35	5.065797019100886	0
S3	flute	orchestral_excerpt_unplayed	0	62.2	0	0	0	0	0	7.85	0.35	5.065797019100886	0
S3	flute	orchestral_excerpt_unplayed	7.85	61.5	7.85	0	0	0	0	7.85	0.35	5.065797019100886	3.418727983337734e-11
S3	flute	orchestral_excerpt_unplayed	0	61.9	0	0	0	0	0	7.85	0.35	5.065797019100886	0
S3	flute	orchestral_excerpt_unplayed	0	62.2	0	0	0	0	0	7.85	0.35	5.065797019100886	0
S3	flute	orchestral_excerpt_played	502.25	95.8	313.91	125.56	62.78	0	0	7.85	0.35	5.065797019100886	3.916046069663894e-08
S3	flute	orchestral_excerpt_played	368.84	95.8	282.52	62.78	23.54	0	0	7.85	0.35	5.065797019100886	1.585381684648134e-08
S3	flute	orchestral_excerpt_played	235.43	96.09999999999999	149.11	62.78	23.54	0	0	7.85	0.35	5.065797019100886	1.527263308931393e-08
S3	flute	orchestral_excerpt_played	486.56	96.8	337.45	117.72	31.39	0	0	7.85	0.35	5.065797019100886	2.194402701508e-08
S3	flute	orchestral_excerpt_played	831.86	94	517.95	219.74	94.17	0	0	7.85	0.35	5.065797019100886	5.984723714144031e-08
S3	flute	piano	517.95	81.09999999999999	494.41	23.54	0	0	0	23.54	0.35	5.065797019100886	2.829865442613994e-09
S3	flute	piano	729.84	81.3	565.03	141.26	23.54	0	0	23.54	0.35	5.065797019100886	1.9338114964187e-08
S3	flute	piano	235.43	82.59999999999999	188.34	47.09	0	0	0	23.54	0.35	5.065797019100886	2.1726283422235e-09
S3	flute	piano	235.43	81.2	235.43	0	0	0	0	23.54	0.35	5.065797019100886	1.02561839500132e-09
S3	flute	piano	47.09	82.59999999999999	47.09	0	0	0	0	23.54	0.35	5.065797019100886	2.05123679000264e-10
S3	flute	forte	2401.4	88	1577.39	729.84	94.17	0	0	23.54	0.35	5.065797019100886	7.911063420302272e-08
S3	flute	forte	1883.45	87.8	1318.41	447.32	117.72	0	0	23.54	0.35	5.065797019100886	8.26898821487031e-08
S3	flute	forte	729.84	90.09999999999999	423.78	282.52	23.54	0	0	23.54	0.35	5.065797019100886	2.277914480585354e-08
S3	flute	forte	2001.16	89.90000000000001	1389.04	470.86	141.26	0	0	23.54	0.35	5.065797019100886	9.649386441783121e-08
S3	flute	forte	1389.04	88.90000000000001	894.64	353.15	141.26	0	0	23.54	0.35	5.065797019100886	9.095973172277233e-08
S4	flute	breathing	15.7	63.1	15.7	0	0	0	0	7.85	0.35	5.065797019100886	6.837455966675468e-11
S4	flute	breathing	7.85	63.1	7.85	0	0	0	0	7.85	0.35	5.065797019100886	3.418727983337734e-11
S4	flute	breathing	15.7	63.1	7.85	0	7.85	0	0	7.85	0.35	5.065797019100886	4.307597259005544e-09
S4	flute	breathing	7.85	63.1	7.85	0	0	0	0	7.85	0.35	5.065797019100886	3.418727983337734e-11
S4	flute	breathing	0	63.1	0	0	0	0	0	7.85	0.35	5.065797019100886	0
S4	flute	speaking	70.63	67.40000000000001	54.93	7.85	7.85	0	0	7.85	0.35	5.065797019100886	4.738076542376214e-09
S4	flute	speaking	94.17	68.5	62.78	23.54	7.85	0	0	7.85	0.35	5.065797019100886	5.222975030950407e-09
S4	flute	speaking	62.78	69.40000000000001	47.09	7.85	7.85	0	0	7.85	0.35	5.065797019100886	4.703889262542837e-09
S4	flute	speaking	39.24	69.59999999999999	7.85	31.39	0	0	0	7.85	0.35	5.065797019100886	9.356096973150062e-10
S4	flute	speaking	133.41	68	86.31999999999999	15.7	31.39	0	0	7.85	0.35	5.065797019100886	1.792041120359663e-08
S4	flute	ode_unplayed	0	61.5	0	0	0	0	0	7.85	0.35	5.065797019100886	0
S4	flute	ode_unplayed	62.78	62.1	62.78	0	0	0	0	7.85	0.35	5.065797019100886	2.734982386670187e-10
S4	flute	ode_unplayed	15.7	61.5	15.7	0	0	0	0	7.85	0.35	5.065797019100886	6.837455966675468e-11
S4	flute	ode_unplayed	62.78	61.7	54.93	7.85	0	0	0	7.85	0.35	5.065797019100886	4.646665632040486e-10
S4	flute	ode_unplayed	70.63	62.2	62.78	7.85	0	0	0	7.85	0.35	5.065797019100886	4.98853843037426e-10
S4	flute	ode_played	31.39	83.3	31.39	0	0	0	0	7.85	0.35	5.065797019100886	1.367491193335094e-10
S4	flute	ode_played	15.7	82.5	15.7	0	0	0	0	7.85	0.35	5.065797019100886	6.837455966675468e-11
S4	flute	ode_played	86.31999999999999	82.5	78.48	7.85	0	0	0	7.85	0.35	5.065797019100886	5.672284027041807e-10
S4	flute	ode_played	31.39	79.8	31.39	0	0	0	0	7.85	0.35	5.065797019100886	1.367491193335094e-10
S4	flute	ode_played	102.02	81.3	94.17	7.85	0	0	0	7.85	0.35	5.065797019100886	6.356029623709353e-10
S4	flute	orchestral_excerpt_unplayed	149.11	61.9	133.41	15.7	0	0	0	7.85	0.35	5.065797019100886	1.031894965908229e-09
S4	flute	orchestral_excerpt_unplayed	23.54	61.9	23.54	0	0	0	0	7.85	0.35	5.065797019100886	1.02561839500132e-10
S4	flute	orchestral_excerpt_unplayed	117.72	62.4	109.87	7.85	0	0	0	7.85	0.35	5.065797019100886	7.039775220376901e-10
S4	flute	orchestral_excerpt_unplayed	62.78	62.3	54.93	7.85	0	0	0	7.85	0.35	5.065797019100886	4.646665632040486e-10
S4	flute	orchestral_excerpt_unplayed	23.54	62.7	23.54	0	0	0	0	7.85	0.35	5.065797019100886	1.02561839500132e-10
S4	flute	orchestral_excerpt_played	47.09	87.90000000000001	39.24	7.85	0	0	0	7.85	0.35	5.065797019100886	3.96292003537294e-10
S4	flute	orchestral_excerpt_played	31.39	90.40000000000001	31.39	0	0	0	0	7.85	0.35	5.065797019100886	1.367491193335094e-10
S4	flute	orchestral_excerpt_played	70.63	91.3	70.63	0	0	0	0	7.85	0.35	5.065797019100886	3.076855185003961e-10
S4	flute	orchestral_excerpt_played	15.7	89.2	15.7	0	0	0	0	7.85	0.35	5.065797019100886	6.837455966675468e-11
S4	flute	orchestral_excerpt_played	23.54	93.2	23.54	0	0	0	0	7.85	0.35	5.065797019100886	1.02561839500132e-10
S4	flute	piano	0	75.5	0	0	0	0	0	23.54	0.35	5.065797019100886	0
S4	flute	piano	23.54	71.2	23.54	0	0	0	0	23.54	0.35	5.065797019100886	1.02561839500132e-10
S4	flute	piano	23.54	71.09999999999999	23.54	0	0	0	0	23.54	0.35	5.065797019100886	1.02561839500132e-10
S4	flute	piano	23.54	73.59999999999999	0	23.54	0	0	0	23.54	0.35	5.065797019100886	6.760668131112217e-10
S4	flute	piano	0	78.90000000000001	0	0	0	0	0	23.54	0.35	5.065797019100886	0
S4	flute	forte	47.09	84.40000000000001	47.09	0	0	0	0	23.54	0.35	5.065797019100886	2.05123679000264e-10
S4	flute	forte	94.17	84.7	94.17	0	0	0	0	23.54	0.35	5.065797019100886	4.102473580005281e-10
S4	flute	forte	0	83.3	0	0	0	0	0	23.54	0.35	5.065797019100886	0
S4	flute	forte	117.72	86	117.72	0	0	0	0	23.54	0.35	5.065797019100886	5.128091975006602e-10
S4	flute	forte	70.63	84.90000000000001	47.09	23.54	0	0	0	23.54	0.35	5.065797019100886	8.811904921114858e-10
S5	flute	breathing	109.87	62.6	70.63	31.39	7.85	0	0	7.85	0.35	5.065797019100886	5.482517915154191e-09
S5	flute	breathing	78.48	62.6	39.24	39.24	0	0	0	7.85	0.35	5.065797019100886	1.297714421018923e-09
S5	flute	breathing	368.84	62.6	149.11	141.26	78.48	0	0	7.85	0.35	5.065797019100886	4.744005898722316e-08
S5	flute	breathing	62.78	62.6	47.09	7.85	7.85	0	0	7.85	0.35	5.065797019100886	4.703889262542837e-09
S5	flute	breathing	15.7	62.6	0	0	15.7	0	0	7.85	0.35	5.065797019100886	8.546819958344333e-09
S5	flute	speaking	219.74	66.90000000000001	133.41	23.54	47.09	7.85	7.85	7.85	0.35	5.065797019100886	2.864405946490961e-07
S5	flute	speaking	133.41	66.59999999999999	78.48	47.09	7.85	0	0	7.85	0.35	5.065797019100886	5.967416403728383e-09
S5	flute	speaking	156.95	66.3	94.17	47.09	15.7	0	0	7.85	0.35	5.065797019100886	1.03092009425673e-08
S5	flute	speaking	204.04	66	156.95	23.54	23.54	0	0	7.85	0.35	5.065797019100886	1.418004234729527e-08
S5	flute	speaking	235.43	67.2	149.11	54.93	31.39	0	0	7.85	0.35	5.065797019100886	1.932068746411569e-08
S5	flute	ode_unplayed	7.85	61.8	0	0	7.85	0	0	7.85	0.35	5.065797019100886	4.273409979172167e-09
S5	flute	ode_unplayed	102.02	61.8	86.31999999999999	7.85	7.85	0	0	7.85	0.35	5.065797019100886	4.874825661709724e-09
S5	flute	ode_unplayed	15.7	63.6	15.7	0	0	0	0	7.85	0.35	5.065797019100886	6.837455966675468e-11
S5	flute	ode_unplayed	39.24	61.4	39.24	0	0	0	0	7.85	0.35	5.065797019100886	1.709363991668867e-10
S5	flute	ode_unplayed	62.78	62.7	39.24	15.7	7.85	0	0	7.85	0.35	5.065797019100886	4.895057587079868e-09
S5	flute	ode_played	1475.37	82.2	1067.29	258.97	133.41	7.85	7.85	7.85	0.35	5.065797019100886	3.44277058851274e-07
S5	flute	ode_played	1977.62	83.40000000000001	1373.35	415.93	164.8	15.7	7.85	7.85	0.35	5.065797019100886	4.013983946022498e-07
S5	flute	ode_played	2315.07	82.2	1381.2	674.9	251.13	7.85	0	7.85	0.35	5.065797019100886	1.963339423934161e-07
S5	flute	ode_played	1232.09	83.3	824.01	329.6	78.48	0	0	7.85	0.35	5.065797019100886	5.578869955778338e-08
S5	flute	ode_played	1922.69	82	1177.16	549.34	180.5	15.7	0	7.85	0.35	5.065797019100886	1.875659734686496e-07
S5	flute	orchestral_excerpt_unplayed	439.47	61.9	329.6	78.48	31.39	0	0	7.85	0.35	5.065797019100886	2.078306171339458e-08
S5	flute	orchestral_excerpt_unplayed	1161.46	61.7	619.97	392.39	149.11	0	0	7.85	0.35	5.065797019100886	9.516336492962832e-08
S5	flute	orchestral_excerpt_unplayed	204.04	61.5	172.65	15.7	15.7	0	0	7.85	0.35	5.065797019100886	9.749651323419448e-09
S5	flute	orchestral_excerpt_unplayed	219.74	61.9	125.56	62.78	31.39	0	0	7.85	0.35	5.065797019100886	1.944348122898596e-08
S5	flute	orchestral_excerpt_unplayed	133.41	61.7	102.02	31.39	0	0	0	7.85	0.35	5.065797019100886	1.345857055315534e-09
S5	flute	orchestral_excerpt_played	1185	92.5	682.75	392.39	109.87	0	0	7.85	0.35	5.065797019100886	7.406981327243451e-08
S5	flute	orchestral_excerpt_played	1302.72	97	800.47	353.15	141.26	7.85	0	7.85	0.35	5.065797019100886	1.247367641981491e-07
S5	flute	orchestral_excerpt_played	2165.97	95.09999999999999	1287.02	682.75	196.19	0	0	7.85	0.35	5.065797019100886	1.320479009522034e-07
S5	flute	orchestral_excerpt_played	2095.34	95.90000000000001	1349.81	549.34	196.19	0	0	7.85	0.35	5.065797019100886	1.284903539165736e-07
S5	flute	orchestral_excerpt_played	1852.06	94.8	1232.09	502.25	117.72	0	0	7.85	0.35	5.065797019100886	8.38913113011288e-08
S5	flute	piano	941.72	73.40000000000001	588.58	258.97	94.17	0	0	23.54	0.35	5.065797019100886	6.128170068179273e-08
S5	flute	piano	800.47	78.40000000000001	447.32	164.8	188.34	0	0	23.54	0.35	5.065797019100886	1.09242982142413e-07
S5	flute	piano	612.12	76.8	353.15	164.8	94.17	0	0	23.54	0.35	5.065797019100886	5.755181503434653e-08
S5	flute	piano	1341.96	76.3	988.8099999999999	235.43	94.17	23.54	0	23.54	0.35	5.065797019100886	1.649110246403157e-07
S5	flute	piano	517.95	75.7	447.32	70.63	0	0	0	23.54	0.35	5.065797019100886	3.976875389836174e-09
S5	flute	forte	4190.67	91.2	2377.85	1483.22	329.6	0	0	23.54	0.35	5.065797019100886	2.324341741407513e-07
S5	flute	forte	3578.55	90.3	2613.29	800.47	141.26	23.54	0	23.54	0.35	5.065797019100886	2.138538549555272e-07
S5	flute	forte	2848.72	91	1954.08	753.38	141.26	0	0	23.54	0.35	5.065797019100886	1.07068150323169e-07
S5	flute	forte	5462	96	3272.49	1742.19	447.32	0	0	23.54	0.35	5.065797019100886	3.078694086735622e-07
S5	flute	forte	4473.19	95.2	2989.98	1177.16	306.06	0	0	23.54	0.35	5.065797019100886	2.134916834597923e-07
S6	oboe	breathing	23.54	62	7.85	7.85	7.85	0	0	7.85	0.35	5.065797019100886	4.53295286337595e-09
S6	oboe	breathing	23.54	62	15.7	7.85	0	0	0	7.85	0.35	5.065797019100886	2.937301640371619e-10
S6	oboe	breathing	0	62	0	0	0	0	0	7.85	0.35	5.065797019100886	0
S6	oboe	breathing	23.54	62	15.7	0	7.85	0	0	7.85	0.35	5.065797019100886	4.341784538838921e-09
S6	oboe	breathing	nan	62						7.85	0.35	5.065797019100886
S6	oboe	speaking	258.97	69.5	149.11	78.48	31.39	0	0	7.85	0.35	5.065797019100886	1.999675427722691e-08
S6	oboe	speaking	345.3	68.7	227.58	102.02	15.7	0	0	7.85	0.35	5.065797019100886	1.246787393032757e-08
S6	oboe	speaking	235.43	68.5	156.95	39.24	39.24	0	0	7.85	0.35	5.065797019100886	2.317757351438041e-08
S6	oboe	speaking	321.76	68.5	235.43	62.78	23.54	0	0	7.85	0.35	5.065797019100886	1.564869316748108e-08
S6	oboe	speaking	172.65	69.3	109.87	47.09	15.7	0	0	7.85	0.35	5.065797019100886	1.037757550223406e-08
S6	oboe	ode_unplayed	54.93	62	47.09	7.85	0	0	0	7.85	0.35	5.065797019100886	4.304792833706713e-10
S6	oboe	ode_unplayed	39.24	62.5	31.39	7.85	0	0	0	7.85	0.35	5.065797019100886	3.621047237039166e-10
S6	oboe	ode_unplayed	78.48	62	47.09	15.7	15.7	0	0	7.85	0.35	5.065797019100886	9.202654846085411e-09
S6	oboe	ode_unplayed	86.31999999999999	61.4	47.09	23.54	15.7	0	0	7.85	0.35	5.065797019100886	9.428010450455817e-09
S6	oboe	ode_unplayed	188.34	61.6	109.87	78.48	0	0	0	7.85	0.35	5.065797019100886	2.732177961371355e-09
S6	oboe	ode_played	745.53	91.3	541.49	149.11	54.93	0	0	7.85	0.35	5.065797019100886	3.655454864574594e-08
S6	oboe	ode_played	651.36	91.7	541.49	78.48	31.39	0	0	7.85	0.35	5.065797019100886	2.170611826889577e-08
S6	oboe	ode_played	1130.07	90.2	871.1	196.19	54.93	0	7.85	7.85	0.35	5.065797019100886	2.646981523953774e-07
S6	oboe	ode_played	1224.24	91.3	1004.51	196.19	23.54	0	0	7.85	0.35	5.065797019100886	2.283009186544898e-08
S6	oboe	ode_played	1114.37	90.7	926.03	149.11	39.24	0	0	7.85	0.35	5.065797019100886	2.96829053992371e-08
S6	oboe	orchestral_excerpt_unplayed	62.78	62.5	47.09	7.85	7.85	0	0	7.85	0.35	5.065797019100886	4.703889262542837e-09
S6	oboe	orchestral_excerpt_unplayed	70.63	62.4	54.93	15.7	0	0	0	7.85	0.35	5.065797019100886	6.900221675744558e-10
S6	oboe	orchestral_excerpt_unplayed	47.09	63.4	47.09	0	0	0	0	7.85	0.35	5.065797019100886	2.05123679000264e-10
S6	oboe	orchestral_excerpt_unplayed	39.24	61.6	23.54	15.7	0	0	0	7.85	0.35	5.065797019100886	5.532730482409465e-10
S6	oboe	orchestral_excerpt_unplayed	47.09	62.9	39.24	7.85	0	0	0	7.85	0.35	5.065797019100886	3.96292003537294e-10
S6	oboe	orchestral_excerpt_played	1059.44	93.5	792.62	204.04	62.78	0	0	7.85	0.35	5.065797019100886	4.349944081017903e-08
S6	oboe	orchestral_excerpt_played	949.5700000000001	90.09999999999999	721.99	164.8	62.78	0	0	7.85	0.35	5.065797019100886	4.20649772698266e-08
S6	oboe	orchestral_excerpt_played	863.25	90.7	635.66	149.11	70.63	7.85	0	7.85	0.35	5.065797019100886	7.969889579546812e-08
S6	oboe	orchestral_excerpt_played	494.41	nan	439.47	31.39	23.54	0	0	7.85	0.35	5.065797019100886	1.563614002566726e-08
S6	oboe	orchestral_excerpt_played	478.71	89.3	400.23	54.93	23.54	0	0	7.85	0.35	5.065797019100886	1.614127043961159e-08
S6	oboe	piano	117.72	68.5	94.17	23.54	0	0	0	23.54	0.35	5.065797019100886	1.08631417111175e-09
S6	oboe	piano	164.8	72.3	141.26	23.54	0	0	0	23.54	0.35	5.065797019100886	1.291437850112014e-09
S6	oboe	piano	164.8	70.90000000000001	164.8	0	0	0	0	23.54	0.35	5.065797019100886	7.179328765009242e-10
S6	oboe	piano	70.63	70.7	70.63	0	0	0	0	23.54	0.35	5.065797019100886	3.076855185003961e-10
S6	oboe	piano	117.72	73	70.63	47.09	0	0	0	23.54	0.35	5.065797019100886	1.65981914472284e-09
S6	oboe	forte	423.78	83.2	306.06	70.63	47.09	0	0	23.54	0.35	5.065797019100886	2.900196422786838e-08
S6	oboe	forte	353.15	84.59999999999999	306.06	47.09	0	0	0	23.54	0.35	5.065797019100886	2.68543753972416e-09
S6	oboe	forte	400.23	85.90000000000001	376.69	23.54	0	0	0	23.54	0.35	5.065797019100886	2.317056245113334e-09
S6	oboe	forte	306.06	85.3	211.89	70.63	23.54	0	0	23.54	0.35	5.065797019100886	1.577148693235135e-08
S6	oboe	forte	659.21	84.8	541.49	70.63	47.09	0	0	23.54	0.35	5.065797019100886	3.00275826228697e-08
S7	oboe	breathing	125.56	63.3	39.24	39.24	47.09	0	0	7.85	0.35	5.065797019100886	2.693817429605192e-08
S7	oboe	breathing	109.87	63.3	70.63	7.85	31.39	0	0	7.85	0.35	5.065797019100886	1.762668103955947e-08
S7	oboe	breathing	149.11	63.3	78.48	23.54	39.24	0	7.85	7.85	0.35	5.065797019100886	2.477405938777129e-07
S7	oboe	breathing	54.93	63.3	47.09	7.85	0	0	0	7.85	0.35	5.065797019100886	4.304792833706713e-10
S7	oboe	breathing	39.24	63.3	23.54	15.7	0	0	0	7.85	0.35	5.065797019100886	5.532730482409465e-10
S7	oboe	speaking	557.1900000000001	68.09999999999999	298.21	133.41	125.56	0	0	7.85	0.35	5.065797019100886	7.350472157471992e-08
S7	oboe	speaking	439.47	67.09999999999999	235.43	141.26	62.78	0	0	7.85	0.35	5.065797019100886	3.926929910704598e-08
S7	oboe	speaking	258.97	67.59999999999999	204.04	31.39	15.7	0	7.85	7.85	0.35	5.065797019100886	2.356927160219009e-07
S7	oboe	speaking	376.69	69.2	172.65	156.95	47.09	0	0	7.85	0.35	5.065797019100886	3.089969211877544e-08
S7	oboe	speaking	298.21	69.2	180.5	78.48	39.24	0	0	7.85	0.35	5.065797019100886	2.440691337573258e-08
S7	oboe	ode_unplayed	15.7	62.5	7.85	7.85	0	0	0	7.85	0.35	5.065797019100886	2.595428842037846e-10
S7	oboe	ode_unplayed	78.48	63	47.09	31.39	0	0	0	7.85	0.35	5.065797019100886	1.106546096481893e-09
S7	oboe	ode_unplayed	102.02	62.7	78.48	23.54	0	0	0	7.85	0.35	5.065797019100886	1.017939611444995e-09
S7	oboe	ode_unplayed	54.93	61.6	15.7	7.85	31.39	0	0	7.85	0.35	5.065797019100886	1.738737008072583e-08
S7	oboe	ode_unplayed	70.63	62	23.54	31.39	15.7	0	0	7.85	0.35	5.065797019100886	9.550804215326093e-09
S7	oboe	ode_played	1043.74	89.8	698.45	172.65	172.65	0	0	7.85	0.35	5.065797019100886	1.020155107431072e-07
S7	oboe	ode_played	1020.2	88.5	721.99	180.5	109.87	0	7.85	7.85	0.35	5.065797019100886	2.935117527240075e-07
S7	oboe	ode_played	1828.51	89.59999999999999	1255.63	360.99	204.04	0	7.85	7.85	0.35	5.065797019100886	3.523005864032625e-07
S7	oboe	ode_played	1043.74	90.5	792.62	188.34	54.93	7.85	0	7.85	0.35	5.065797019100886	7.296259945564338e-08
S7	oboe	ode_played	831.86	91.40000000000001	533.64	180.5	102.02	7.85	7.85	7.85	0.35	5.065797019100886	3.226051278622116e-07
S7	oboe	orchestral_excerpt_unplayed	54.93	61.8	54.93	0	0	0	0	7.85	0.35	5.065797019100886	2.393109588336414e-10
S7	oboe	orchestral_excerpt_unplayed	62.78	63.1	54.93	0	0	0	7.85	7.85	0.35	5.065797019100886	2.255949153292408e-07
S7	oboe	orchestral_excerpt_unplayed	23.54	62.4	23.54	0	0	0	0	7.85	0.35	5.065797019100886	1.02561839500132e-10
S7	oboe	orchestral_excerpt_unplayed	0	62.3	0	0	0	0	0	7.85	0.35	5.065797019100886	0
S7	oboe	orchestral_excerpt_unplayed	0	62.1	0	0	0	0	0	7.85	0.35	5.065797019100886	0
S7	oboe	orchestral_excerpt_played	400.23	93.3	321.76	47.09	31.39	0	0	7.85	0.35	5.065797019100886	1.984745201607958e-08
S7	oboe	orchestral_excerpt_played	533.64	90.90000000000001	423.78	62.78	47.09	0	0	7.85	0.35	5.065797019100886	2.928941782099863e-08
S7	oboe	orchestral_excerpt_played	376.69	91	337.45	23.54	15.7	0	0	7.85	0.35	5.065797019100886	1.069293980429078e-08
S7	oboe	orchestral_excerpt_played	667.05	90.2	502.25	102.02	54.93	7.85	0	7.85	0.35	5.065797019100886	6.921875845373394e-08
S7	oboe	orchestral_excerpt_played	502.25	92.59999999999999	408.08	62.78	31.39	0	0	7.85	0.35	5.065797019100886	2.067422330298755e-08
S7	oboe	piano	0	67.90000000000001	0	0	0	0	0	23.54	0.35	5.065797019100886	0
S7	oboe	piano	0	67.3	0	0	0	0	0	23.54	0.35	5.065797019100886	0
S7	oboe	piano	47.09	64.90000000000001	0	47.09	0	0	0	23.54	0.35	5.065797019100886	1.352133626222443e-09
S7	oboe	piano	47.09	65.90000000000001	47.09	0	0	0	0	23.54	0.35	5.065797019100886	2.05123679000264e-10
S7	oboe	piano	23.54	66.5	23.54	0	0	0	0	23.54	0.35	5.065797019100886	1.02561839500132e-10
S7	oboe	forte	682.75	85.09999999999999	659.21	23.54	0	0	0	23.54	0.35	5.065797019100886	3.547798319114919e-09
S7	oboe	forte	70.63	85.3	47.09	23.54	0	0	0	23.54	0.35	5.065797019100886	8.811904921114858e-10
S7	oboe	forte	353.15	83.7	258.97	94.17	0	0	0	23.54	0.35	5.065797019100886	3.832447486946339e-09
S7	oboe	forte	188.34	84	188.34	0	0	0	0	23.54	0.35	5.065797019100886	8.204947160010562e-10
S7	oboe	forte	871.1	85.5	824.01	47.09	0	0	0	23.54	0.35	5.065797019100886	4.941798008727065e-09
S8	oboe	breathing	0	62.9	0	0	0	0	0	7.85	0.35	5.065797019100886	0
S8	oboe	breathing	0	62.9	0	0	0	0	0	7.85	0.35	5.065797019100886	0
S8	oboe	breathing	0	62.9	0	0	0	0	0	7.85	0.35	5.065797019100886	0
S8	oboe	breathing	0	62.9	0	0	0	0	0	7.85	0.35	5.065797019100886	0
S8	oboe	breathing	0	62.9	0	0	0	0	0	7.85	0.35	5.065797019100886	0
S8	oboe	speaking	62.78	70.7	31.39	15.7	15.7	0	0	7.85	0.35	5.065797019100886	9.134280286418656e-09
S8	oboe	speaking	23.54	68.7	23.54	0	0	0	0	7.85	0.35	5.065797019100886	1.02561839500132e-10
S8	oboe	speaking	78.48	71.3	54.93	15.7	0	7.85	0	7.85	0.35	5.065797019100886	3.487730200095178e-08
S8	oboe	speaking	47.09	69.59999999999999	39.24	0	7.85	0	0	7.85	0.35	5.065797019100886	4.444346378339053e-09
S8	oboe	speaking	39.24	69.7	23.54	7.85	7.85	0	0	7.85	0.35	5.065797019100886	4.601327423042705e-09
S8	oboe	ode_unplayed	15.7	62.2	0	15.7	0	0	0	7.85	0.35	5.065797019100886	4.507112087408144e-10
S8	oboe	ode_unplayed	7.85	61.7	0	7.85	0	0	0	7.85	0.35	5.065797019100886	2.253556043704072e-10
S8	oboe	ode_unplayed	0	61.9	0	0	0	0	0	7.85	0.35	5.065797019100886	0
S8	oboe	ode_unplayed	7.85	61.9	7.85	0	0	0	0	7.85	0.35	5.065797019100886	3.418727983337734e-11
S8	oboe	ode_unplayed	0	62.1	0	0	0	0	0	7.85	0.35	5.065797019100886	0
S8	oboe	ode_played	392.39	94.40000000000001	251.13	86.31999999999999	47.09	7.85	0	7.85	0.35	5.065797019100886	6.340064431115287e-08
S8	oboe	ode_played	533.64	95.59999999999999	384.54	78.48	70.63	0	0	7.85	0.35	5.065797019100886	4.238942256808906e-08
S8	oboe	ode_played	408.08	94.59999999999999	282.52	70.63	54.93	0	0	7.85	0.35	5.065797019100886	3.317281236754041e-08
S8	oboe	ode_played	588.58	94.40000000000001	368.84	133.41	78.48	7.85	0	7.85	0.35	5.065797019100886	8.235922705156465e-08
S8	oboe	ode_played	549.34	93.40000000000001	455.17	86.31999999999999	7.85	0	0	7.85	0.35	5.065797019100886	8.735183857582531e-09
S8	oboe	orchestral_excerpt_unplayed	141.26	61.7	62.78	54.93	23.54	0	0	7.85	0.35	5.065797019100886	1.467121740677637e-08
S8	oboe	orchestral_excerpt_unplayed	23.54	61.7	7.85	0	15.7	0	0	7.85	0.35	5.065797019100886	8.581007238177709e-09
S8	oboe	orchestral_excerpt_unplayed	0	61.9	0	0	0	0	0	7.85	0.35	5.065797019100886	0
S8	oboe	orchestral_excerpt_unplayed	0	62	0	0	0	0	0	7.85	0.35	5.065797019100886	0
S8	oboe	orchestral_excerpt_unplayed	15.7	62.5	15.7	0	0	0	0	7.85	0.35	5.065797019100886	6.837455966675468e-11
S8	oboe	orchestral_excerpt_played	172.65	97.3	94.17	54.93	23.54	0	0	7.85	0.35	5.065797019100886	1.480796652610988e-08
S8	oboe	orchestral_excerpt_played	415.93	94.5	329.6	47.09	39.24	0	0	7.85	0.35	5.065797019100886	2.415504927508512e-08
S8	oboe	orchestral_excerpt_played	510.1	95.09999999999999	360.99	94.17	54.93	0	0	7.85	0.35	5.065797019100886	3.419075197898541e-08
S8	oboe	orchestral_excerpt_played	384.54	94.40000000000001	321.76	47.09	15.7	0	0	7.85	0.35	5.065797019100886	1.130063205773525e-08
S8	oboe	orchestral_excerpt_played	337.45	93.59999999999999	243.28	78.48	15.7	0	0	7.85	0.35	5.065797019100886	1.18601816768831e-08
S8	oboe	piano	141.26	77	141.26	0	0	0	0	23.54	0.35	5.065797019100886	6.153710370007922e-10
S8	oboe	piano	141.26	77.3	94.17	0	47.09	0	0	23.54	0.35	5.065797019100886	2.605070723303352e-08
S8	oboe	piano	70.63	76.90000000000001	70.63	0	0	0	0	23.54	0.35	5.065797019100886	3.076855185003961e-10
S8	oboe	piano	23.54	76.3	23.54	0	0	0	0	23.54	0.35	5.065797019100886	1.02561839500132e-10
S8	oboe	piano	306.06	76.5	282.52	23.54	0	0	0	23.54	0.35	5.065797019100886	1.906808887112806e-09
S8	oboe	forte	659.21	92.09999999999999	588.58	23.54	47.09	0	0	23.54	0.35	5.065797019100886	2.888057267564752e-08
S8	oboe	forte	329.6	92.8	306.06	0	23.54	0	0	23.54	0.35	5.065797019100886	1.415353385101821e-08
S8	oboe	forte	470.86	92.90000000000001	400.23	70.63	0	0	0	23.54	0.35	5.065797019100886	3.77175171083591e-09
S8	oboe	forte	565.03	92.7	353.15	164.8	47.09	0	0	23.54	0.35	5.065797019100886	3.191135515931353e-08
S8	oboe	forte	494.41	91.3	494.41	0	0	0	0	23.54	0.35	5.065797019100886	2.153798629502773e-09
S9	oboe	breathing	15.7	61.6	7.85	7.85	0	0	0	7.85	0.35	5.065797019100886	2.595428842037846e-10
S9	oboe	breathing	0	61.6	0	0	0	0	0	7.85	0.35	5.065797019100886	0
S9	oboe	breathing	7.85	61.6	7.85	0	0	0	0	7.85	0.35	5.065797019100886	3.418727983337734e-11
S9	oboe	breathing	0	61.6	0	0	0	0	0	7.85	0.35	5.065797019100886	0
S9	oboe	breathing	0	61.6	0	0	0	0	0	7.85	0.35	5.065797019100886	0
S9	oboe	speaking	23.54	69.3	7.85	0	15.7	0	0	7.85	0.35	5.065797019100886	8.581007238177709e-09
S9	oboe	speaking	23.54	67.5	7.85	15.7	0	0	0	7.85	0.35	5.065797019100886	4.848984885741918e-10
S9	oboe	speaking	31.39	68	31.39	0	0	0	0	7.85	0.35	5.065797019100886	1.367491193335094e-10
S9	oboe	speaking	31.39	71.90000000000001	23.54	7.85	0	0	0	7.85	0.35	5.065797019100886	3.279174438705392e-10
S9	oboe	speaking	31.39	69.7	7.85	23.54	0	0	0	7.85	0.35	5.065797019100886	7.10254092944599e-10
S9	oboe	ode_unplayed	0	62	0	0	0	0	0	7.85	0.35	5.065797019100886	0
S9	oboe	ode_unplayed	0	62.2	0	0	0	0	0	7.85	0.35	5.065797019100886	0
S9	oboe	ode_unplayed	0	61.7	0	0	0	0	0	7.85	0.35	5.065797019100886	0
S9	oboe	ode_unplayed	15.7	61.8	7.85	0	7.85	0	0	7.85	0.35	5.065797019100886	4.307597259005544e-09
S9	oboe	ode_unplayed	15.7	62.4	15.7	0	0	0	0	7.85	0.35	5.065797019100886	6.837455966675468e-11
S9	oboe	ode_played	674.9	92.5	572.88	86.31999999999999	15.7	0	0	7.85	0.35	5.065797019100886	1.352140303425536e-08
S9	oboe	ode_played	455.17	92.40000000000001	360.99	78.48	15.7	0	0	7.85	0.35	5.065797019100886	1.237299087438376e-08
S9	oboe	ode_played	659.21	91.5	510.1	133.41	15.7	0	0	7.85	0.35	5.065797019100886	1.460003842181078e-08
S9	oboe	ode_played	345.3	91.8	298.21	47.09	0	0	0	7.85	0.35	5.065797019100886	2.651250259890782e-09
S9	oboe	ode_played	274.67	91.40000000000001	219.74	39.24	15.7	0	0	7.85	0.35	5.065797019100886	1.063084181553093e-08
S9	oboe	orchestral_excerpt_unplayed	0	62.3	0	0	0	0	0	7.85	0.35	5.065797019100886	0
S9	oboe	orchestral_excerpt_unplayed	0	62.5	0	0	0	0	0	7.85	0.35	5.065797019100886	0
S9	oboe	orchestral_excerpt_unplayed	0	61.5	0	0	0	0	0	7.85	0.35	5.065797019100886	0
S9	oboe	orchestral_excerpt_unplayed	7.85	63	7.85	0	0	0	0	7.85	0.35	5.065797019100886	3.418727983337734e-11
S9	oboe	orchestral_excerpt_unplayed	7.85	61.8	7.85	0	0	0	0	7.85	0.35	5.065797019100886	3.418727983337734e-11
S9	oboe	orchestral_excerpt_played	745.53	95.90000000000001	612.12	86.31999999999999	47.09	0	0	7.85	0.35	5.065797019100886	3.078597935011091e-08
S9	oboe	orchestral_excerpt_played	863.25	95.3	784.77	54.93	23.54	0	0	7.85	0.35	5.065797019100886	1.781644715144708e-08
S9	oboe	orchestral_excerpt_played	588.58	94.8	572.88	15.7	0	0	0	7.85	0.35	5.065797019100886	2.946382636577361e-09
S9	oboe	orchestral_excerpt_played	557.1900000000001	94.90000000000001	478.71	62.78	15.7	0	0	7.85	0.35	5.065797019100886	1.243508886314361e-08
S9	oboe	orchestral_excerpt_played	1114.37	94.90000000000001	988.8099999999999	117.72	7.85	0	0	7.85	0.35	5.065797019100886	1.196134130373382e-08
S9	oboe	piano	0	70.5	0	0	0	0	0	23.54	0.35	5.065797019100886	0
S9	oboe	piano	23.54	68	23.54	0	0	0	0	23.54	0.35	5.065797019100886	1.02561839500132e-10
S9	oboe	piano	0	73.09999999999999	0	0	0	0	0	23.54	0.35	5.065797019100886	0
S9	oboe	piano	47.09	72.5	23.54	23.54	0	0	0	23.54	0.35	5.065797019100886	7.786286526113538e-10
S9	oboe	piano	47.09	75	47.09	0	0	0	0	23.54	0.35	5.065797019100886	2.05123679000264e-10
S9	oboe	forte	2401.4	94.7	1718.65	494.41	188.34	0	0	23.54	0.35	5.065797019100886	1.242462568589773e-07
S9	oboe	forte	3555.01	94.90000000000001	2895.8	541.49	117.72	0	0	23.54	0.35	5.065797019100886	9.226579264765682e-08
S9	oboe	forte	1341.96	90.5	965.27	353.15	23.54	0	0	23.54	0.35	5.065797019100886	2.716626755369024e-08
S9	oboe	forte	1106.53	94.90000000000001	988.8099999999999	70.63	47.09	0	0	23.54	0.35	5.065797019100886	3.197625757337221e-08
S9	oboe	forte	1035.9	91.90000000000001	800.47	164.8	70.63	0	0	23.54	0.35	5.065797019100886	4.668026004733253e-08
S10	oboe	breathing	0	62.6	0	0	0	0	0	7.85	0.35	5.065797019100886	0
S10	oboe	breathing	7.85	62.6	7.85	0	0	0	0	7.85	0.35	5.065797019100886	3.418727983337734e-11
S10	oboe	breathing	15.7	62.6	7.85	0	7.85	0	0	7.85	0.35	5.065797019100886	4.307597259005544e-09
S10	oboe	breathing	7.85	62.6	7.85	0	0	0	0	7.85	0.35	5.065797019100886	3.418727983337734e-11
S10	oboe	breathing	7.85	62.6	7.85	0	0	0	0	7.85	0.35	5.065797019100886	3.418727983337734e-11
S10	oboe	speaking	47.09	64.09999999999999	31.39	7.85	7.85	0	0	7.85	0.35	5.065797019100886	4.635514702876083e-09
S10	oboe	speaking	47.09	63.5	39.24	7.85	0	0	0	7.85	0.35	5.065797019100886	3.96292003537294e-10
S10	oboe	speaking	39.24	64.90000000000001	39.24	0	0	0	0	7.85	0.35	5.065797019100886	1.709363991668867e-10
S10	oboe	speaking	62.78	66.59999999999999	62.78	0	0	0	0	7.85	0.35	5.065797019100886	2.734982386670187e-10
S10	oboe	speaking	23.54	65.59999999999999	23.54	0	0	0	0	7.85	0.35	5.065797019100886	1.02561839500132e-10
S10	oboe	ode_unplayed	0	61.6	0	0	0	0	0	7.85	0.35	5.065797019100886	0
S10	oboe	ode_unplayed	7.85	61.6	7.85	0	0	0	0	7.85	0.35	5.065797019100886	3.418727983337734e-11
S10	oboe	ode_unplayed	0	63.4	0	0	0	0	0	7.85	0.35	5.065797019100886	0
S10	oboe	ode_unplayed	0	62.4	0	0	0	0	0	7.85	0.35	5.065797019100886	0
S10	oboe	ode_unplayed	0	61.8	0	0	0	0	0	7.85	0.35	5.065797019100886	0
S10	oboe	ode_played	102.02	86.7	70.63	15.7	15.7	0	0	7.85	0.35	5.065797019100886	9.305216685585542e-09
S10	oboe	ode_played	109.87	88.7	70.63	0	39.24	0	0	7.85	0.35	5.065797019100886	2.167473541436122e-08
S10	oboe	ode_played	156.95	89.2	133.41	7.85	15.7	0	0	7.85	0.35	5.065797019100886	9.353359319882154e-09
S10	oboe	ode_played	117.72	92.90000000000001	102.02	7.85	7.85	0	0	7.85	0.35	5.065797019100886	4.943200221376479e-09
S10	oboe	ode_played	94.17	90.40000000000001	78.48	7.85	7.85	0	0	7.85	0.35	5.065797019100886	4.840638381876347e-09
S10	oboe	orchestral_excerpt_unplayed	0	62.5	0	0	0	0	0	7.85	0.35	5.065797019100886	0
S10	oboe	orchestral_excerpt_unplayed	31.39	62.1	7.85	23.54	0	0	0	7.85	0.35	5.065797019100886	7.10254092944599e-10
S10	oboe	orchestral_excerpt_unplayed	0	61.4	0	0	0	0	0	7.85	0.35	5.065797019100886	0
S10	oboe	orchestral_excerpt_unplayed	7.85	61.5	0	7.85	0	0	0	7.85	0.35	5.065797019100886	2.253556043704072e-10
S10	oboe	orchestral_excerpt_unplayed	0	61.7	0	0	0	0	0	7.85	0.35	5.065797019100886	0
S10	oboe	orchestral_excerpt_played	102.02	87	78.48	23.54	0	0	0	7.85	0.35	5.065797019100886	1.017939611444995e-09
S10	oboe	orchestral_excerpt_played	258.97	86.90000000000001	172.65	70.63	15.7	0	0	7.85	0.35	5.065797019100886	1.13271405540123e-08
S10	oboe	orchestral_excerpt_played	219.74	89	180.5	15.7	23.54	0	0	7.85	0.35	5.065797019100886	1.405724858242499e-08
S10	oboe	orchestral_excerpt_played	204.04	88.5	188.34	15.7	0	0	0	7.85	0.35	5.065797019100886	1.271205924741871e-09
S10	oboe	orchestral_excerpt_played	227.58	91.2	196.19	31.39	0	0	0	7.85	0.35	5.065797019100886	1.756104413316062e-09
S10	oboe	piano	70.63	73.90000000000001	47.09	0	23.54	0	0	23.54	0.35	5.065797019100886	1.302535361651676e-08
S10	oboe	piano	141.26	72.2	70.63	23.54	23.54	23.54	0	23.54	0.35	5.065797019100886	1.163658217692601e-07
S10	oboe	piano	47.09	75.5	47.09	0	0	0	0	23.54	0.35	5.065797019100886	2.05123679000264e-10
S10	oboe	piano	47.09	74.2	0	23.54	23.54	0	0	23.54	0.35	5.065797019100886	1.349629675062772e-08
S10	oboe	piano	47.09	74.2	47.09	0	0	0	0	23.54	0.35	5.065797019100886	2.05123679000264e-10
S10	oboe	forte	1412.59	87.7	1035.9	282.52	94.17	0	0	23.54	0.35	5.065797019100886	6.390644244540647e-08
S10	oboe	forte	988.8099999999999	87.5	729.84	211.89	47.09	0	0	23.54	0.35	5.065797019100886	3.490447821753808e-08
S10	oboe	forte	847.55	86.40000000000001	776.92	47.09	23.54	0	0	23.54	0.35	5.065797019100886	1.75569042672433e-08
S10	oboe	forte	706.29	86.3	612.12	70.63	23.54	0	0	23.54	0.35	5.065797019100886	1.75150382038536e-08
S10	oboe	forte	776.92	84.59999999999999	659.21	117.72	0	0	0	23.54	0.35	5.065797019100886	6.252065571559806e-09
S11	oboe	breathing	0	62.5	0	0	0	0	0	7.85	0.35	5.065797019100886	0
S11	oboe	breathing	0	62.5	0	0	0	0	0	7.85	0.35	5.065797019100886	0
S11	oboe	breathing	7.85	62.5	0	0	7.85	0	0	7.85	0.35	5.065797019100886	4.273409979172167e-09
S11	oboe	breathing	0	62.5	0	0	0	0	0	7.85	0.35	5.065797019100886	0
S11	oboe	breathing	15.7	62.5	15.7	0	0	0	0	7.85	0.35	5.065797019100886	6.837455966675468e-11
S11	oboe	speaking	47.09	67.90000000000001	39.24	0	7.85	0	0	7.85	0.35	5.065797019100886	4.444346378339053e-09
S11	oboe	speaking	62.78	68	47.09	15.7	0	0	0	7.85	0.35	5.065797019100886	6.558348877410785e-10
S11	oboe	speaking	15.7	65.7	0	7.85	7.85	0	0	7.85	0.35	5.065797019100886	4.498765583542573e-09
S11	oboe	speaking	39.24	67.3	23.54	7.85	7.85	0	0	7.85	0.35	5.065797019100886	4.601327423042705e-09
S11	oboe	speaking	31.39	66.7	23.54	0	7.85	0	0	7.85	0.35	5.065797019100886	4.375971818672298e-09
S11	oboe	ode_unplayed	7.85	61.4	7.85	0	0	0	0	7.85	0.35	5.065797019100886	3.418727983337734e-11
S11	oboe	ode_unplayed	0	62.2	0	0	0	0	0	7.85	0.35	5.065797019100886	0
S11	oboe	ode_unplayed	7.85	61.7	7.85	0	0	0	0	7.85	0.35	5.065797019100886	3.418727983337734e-11
S11	oboe	ode_unplayed	15.7	62.2	7.85	7.85	0	0	0	7.85	0.35	5.065797019100886	2.595428842037846e-10
S11	oboe	ode_unplayed	7.85	63	0	7.85	0	0	0	7.85	0.35	5.065797019100886	2.253556043704072e-10
S11	oboe	ode_played	227.58	93.2	204.04	7.85	15.7	0	0	7.85	0.35	5.065797019100886	9.661044838382551e-09
S11	oboe	ode_played	188.34	95	164.8	7.85	15.7	0	0	7.85	0.35	5.065797019100886	9.490108439215664e-09
S11	oboe	ode_played	156.95	94.5	133.41	7.85	15.7	0	0	7.85	0.35	5.065797019100886	9.353359319882154e-09
S11	oboe	ode_played	164.8	92.59999999999999	141.26	23.54	0	0	0	7.85	0.35	5.065797019100886	1.291437850112014e-09
S11	oboe	ode_played	282.52	92.59999999999999	258.97	15.7	7.85	0	0	7.85	0.35	5.065797019100886	5.852301422414433e-09
S11	oboe	orchestral_excerpt_unplayed	0	61.5	0	0	0	0	0	7.85	0.35	5.065797019100886	0
S11	oboe	orchestral_excerpt_unplayed	7.85	62.8	7.85	0	0	0	0	7.85	0.35	5.065797019100886	3.418727983337734e-11
S11	oboe	orchestral_excerpt_unplayed	0	61.6	0	0	0	0	0	7.85	0.35	5.065797019100886	0
S11	oboe	orchestral_excerpt_unplayed	7.85	61.4	7.85	0	0	0	0	7.85	0.35	5.065797019100886	3.418727983337734e-11
S11	oboe	orchestral_excerpt_unplayed	0	62.8	0	0	0	0	0	7.85	0.35	5.065797019100886	0
S11	oboe	orchestral_excerpt_played	86.31999999999999	91.90000000000001	86.31999999999999	0	0	0	0	7.85	0.35	5.065797019100886	3.760600781671508e-10
S11	oboe	orchestral_excerpt_played	125.56	93	125.56	0	0	0	0	7.85	0.35	5.065797019100886	5.469964773340374e-10
S11	oboe	orchestral_excerpt_played	141.26	93.3	141.26	0	0	0	0	7.85	0.35	5.065797019100886	6.153710370007922e-10
S11	oboe	orchestral_excerpt_played	117.72	93	78.48	23.54	15.7	0	0	7.85	0.35	5.065797019100886	9.564759569789327e-09
S11	oboe	orchestral_excerpt_played	188.34	93.90000000000001	164.8	23.54	0	0	0	7.85	0.35	5.065797019100886	1.393999689612146e-09
S11	oboe	piano	0	74.3	0	0	0	0	0	23.54	0.35	5.065797019100886	0
S11	oboe	piano	47.09	74.2	23.54	23.54	0	0	0	23.54	0.35	5.065797019100886	7.786286526113538e-10
S11	oboe	piano	0	74.5	0	0	0	0	0	23.54	0.35	5.065797019100886	0
S11	oboe	piano	47.09	74.2	47.09	0	0	0	0	23.54	0.35	5.065797019100886	2.05123679000264e-10
S11	oboe	piano	47.09	73.7	47.09	0	0	0	0	23.54	0.35	5.065797019100886	2.05123679000264e-10
S11	oboe	forte	306.06	82.40000000000001	306.06	0	0	0	0	23.54	0.35	5.065797019100886	1.333303913501716e-09
S11	oboe	forte	117.72	80.59999999999999	117.72	0	0	0	0	23.54	0.35	5.065797019100886	5.128091975006602e-10
S11	oboe	forte	94.17	80.40000000000001	94.17	0	0	0	0	23.54	0.35	5.065797019100886	4.102473580005281e-10
S11	oboe	forte	23.54	82.40000000000001	23.54	0	0	0	0	23.54	0.35	5.065797019100886	1.02561839500132e-10
S11	oboe	forte	47.09	81.3	47.09	0	0	0	0	23.54	0.35	5.065797019100886	2.05123679000264e-10
S12	clarinette	breathing	0	62.9	0	0	0	0	0	7.85	0.35	5.065797019100886	0
S12	clarinette	breathing	0	62.9	0	0	0	0	0	7.85	0.35	5.065797019100886	0
S12	clarinette	breathing	0	62.9	0	0	0	0	0	7.85	0.35	5.065797019100886	0
S12	clarinette	breathing	7.85	62.9	0	7.85	0	0	0	7.85	0.35	5.065797019100886	2.253556043704072e-10
S12	clarinette	breathing	nan	62.9						7.85	0.35	5.065797019100886
S12	clarinette	speaking	0	66.7	0	0	0	0	0	7.85	0.35	5.065797019100886	0
S12	clarinette	speaking	31.39	67.59999999999999	31.39	0	0	0	0	7.85	0.35	5.065797019100886	1.367491193335094e-10
S12	clarinette	speaking	0	67.7	0	0	0	0	0	7.85	0.35	5.065797019100886	0
S12	clarinette	speaking	7.85	67.5	7.85	0	0	0	0	7.85	0.35	5.065797019100886	3.418727983337734e-11
S12	clarinette	speaking	23.54	67.7	23.54	0	0	0	0	7.85	0.35	5.065797019100886	1.02561839500132e-10
S12	clarinette	ode_unplayed	15.7	62.6	15.7	0	0	0	0	7.85	0.35	5.065797019100886	6.837455966675468e-11
S12	clarinette	ode_unplayed	31.39	61.7	23.54	0	7.85	0	0	7.85	0.35	5.065797019100886	4.375971818672298e-09
S12	clarinette	ode_unplayed	0	61.7	0	0	0	0	0	7.85	0.35	5.065797019100886	0
S12	clarinette	ode_unplayed	0	64.59999999999999	0	0	0	0	0	7.85	0.35	5.065797019100886	0
S12	clarinette	ode_unplayed	0	62.1	0	0	0	0	0	7.85	0.35	5.065797019100886	0
S12	clarinette	ode_played	800.47	77.90000000000001	478.71	258.97	62.78	0	0	7.85	0.35	5.065797019100886	4.370943884743678e-08
S12	clarinette	ode_played	690.6	77.7	384.54	227.58	78.48	0	0	7.85	0.35	5.065797019100886	5.094458903029896e-08
S12	clarinette	ode_played	439.47	76.5	321.76	94.17	23.54	0	0	7.85	0.35	5.065797019100886	1.692617566312986e-08
S12	clarinette	ode_played	973.12	77.90000000000001	565.03	274.67	133.41	0	0	7.85	0.35	5.065797019100886	8.299689994689424e-08
S12	clarinette	ode_played	1028.05	75.2	612.12	282.52	133.41	0	0	7.85	0.35	5.065797019100886	8.342737923026492e-08
S12	clarinette	orchestral_excerpt_unplayed	23.54	61.3	15.7	7.85	0	0	0	7.85	0.35	5.065797019100886	2.937301640371619e-10
S12	clarinette	orchestral_excerpt_unplayed	0	61.3	0	0	0	0	0	7.85	0.35	5.065797019100886	0
S12	clarinette	orchestral_excerpt_unplayed	7.85	62.9	7.85	0	0	0	0	7.85	0.35	5.065797019100886	3.418727983337734e-11
S12	clarinette	orchestral_excerpt_unplayed	7.85	61.8	7.85	0	0	0	0	7.85	0.35	5.065797019100886	3.418727983337734e-11
S12	clarinette	orchestral_excerpt_unplayed	31.39	62.4	23.54	7.85	0	0	0	7.85	0.35	5.065797019100886	3.279174438705392e-10
S12	clarinette	orchestral_excerpt_played	109.87	87.09999999999999	94.17	15.7	0	0	0	7.85	0.35	5.065797019100886	8.609585667413426e-10
S12	clarinette	orchestral_excerpt_played	156.95	84	117.72	31.39	7.85	0	0	7.85	0.35	5.065797019100886	5.687641594154455e-09
S12	clarinette	orchestral_excerpt_played	117.72	86.09999999999999	70.63	23.54	23.54	0	0	7.85	0.35	5.065797019100886	1.380398226912812e-08
S12	clarinette	orchestral_excerpt_played	384.54	85.5	258.97	78.48	47.09	0	0	7.85	0.35	5.065797019100886	2.902219615323852e-08
S12	clarinette	orchestral_excerpt_played	211.89	86.59999999999999	172.65	23.54	15.7	0	0	7.85	0.35	5.065797019100886	9.975006927789855e-09
S12	clarinette	piano	141.26	68.7	141.26	0	0	0	0	23.54	0.35	5.065797019100886	6.153710370007922e-10
S12	clarinette	piano	23.54	69.90000000000001	0	23.54	0	0	0	23.54	0.35	5.065797019100886	6.760668131112217e-10
S12	clarinette	piano	117.72	68.5	117.72	0	0	0	0	23.54	0.35	5.065797019100886	5.128091975006602e-10
S12	clarinette	piano	23.54	70.7	23.54	0	0	0	0	23.54	0.35	5.065797019100886	1.02561839500132e-10
S12	clarinette	piano	117.72	68.90000000000001	117.72	0	0	0	0	23.54	0.35	5.065797019100886	5.128091975006602e-10
S12	clarinette	forte	1153.61	83.59999999999999	988.8099999999999	141.26	23.54	0	0	23.54	0.35	5.065797019100886	2.118422807518937e-08
S12	clarinette	forte	753.38	80.8	612.12	117.72	23.54	0	0	23.54	0.35	5.065797019100886	1.886717183007604e-08
S12	clarinette	forte	94.17	81.59999999999999	94.17	0	0	0	0	23.54	0.35	5.065797019100886	4.102473580005281e-10
S12	clarinette	forte	23.54	82.7	23.54	0	0	0	0	23.54	0.35	5.065797019100886	1.02561839500132e-10
S12	clarinette	forte	70.63	80.8	47.09	23.54	0	0	0	23.54	0.35	5.065797019100886	8.811904921114858e-10
S13	clarinette	breathing	15.7	63.5	7.85	0	7.85	0	0	7.85	0.35	5.065797019100886	4.307597259005544e-09
S13	clarinette	breathing	7.85	63.5	7.85	0	0	0	0	7.85	0.35	5.065797019100886	3.418727983337734e-11
S13	clarinette	breathing	7.85	63.5	7.85	0	0	0	0	7.85	0.35	5.065797019100886	3.418727983337734e-11
S13	clarinette	breathing	0	63.5	0	0	0	0	0	7.85	0.35	5.065797019100886	0
S13	clarinette	breathing	31.39	63.5	23.54	0	7.85	0	0	7.85	0.35	5.065797019100886	4.375971818672298e-09
S13	clarinette	speaking	470.86	77	345.3	102.02	23.54	0	0	7.85	0.35	5.065797019100886	1.725409310700039e-08
S13	clarinette	speaking	651.36	76	455.17	117.72	78.48	0	0	7.85	0.35	5.065797019100886	4.809729608761365e-08
S13	clarinette	speaking	596.4299999999999	76	376.69	196.19	23.54	0	0	7.85	0.35	5.065797019100886	2.009510947877879e-08
S13	clarinette	speaking	368.84	76.5	235.43	86.31999999999999	47.09	0	0	7.85	0.35	5.065797019100886	2.91449899181088e-08
S13	clarinette	speaking	1310.57	78.2	957.42	290.37	62.78	0	0	7.85	0.35	5.065797019100886	4.669628533475443e-08
S13	clarinette	ode_unplayed	47.09	62.8	23.54	23.54	0	0	0	7.85	0.35	5.065797019100886	7.786286526113538e-10
S13	clarinette	ode_unplayed	7.85	62.2	7.85	0	0	0	0	7.85	0.35	5.065797019100886	3.418727983337734e-11
S13	clarinette	ode_unplayed	0	62.9	0	0	0	0	0	7.85	0.35	5.065797019100886	0
S13	clarinette	ode_unplayed	7.85	62.2	7.85	0	0	0	0	7.85	0.35	5.065797019100886	3.418727983337734e-11
S13	clarinette	ode_unplayed	7.85	63.3	0	7.85	0	0	0	7.85	0.35	5.065797019100886	2.253556043704072e-10
S13	clarinette	ode_played	4120.04	88	2887.95	996.66	235.43	0	0	7.85	0.35	5.065797019100886	1.694033801088896e-07
S13	clarinette	ode_played	2652.52	86	1789.28	635.66	227.58	0	0	7.85	0.35	5.065797019100886	1.499773931520058e-07
S13	clarinette	ode_played	3037.06	87	1946.23	831.86	251.13	7.85	0	7.85	0.35	5.065797019100886	2.033025386288274e-07
S13	clarinette	ode_played	2526.96	85.7	1765.73	557.1900000000001	204.04	0	0	7.85	0.35	5.065797019100886	1.348010453312851e-07
S13	clarinette	ode_played	2872.26	87	2126.73	612.12	133.41	0	0	7.85	0.35	5.065797019100886	9.949045962166384e-08
S13	clarinette	orchestral_excerpt_unplayed	54.93	62	39.24	7.85	0	7.85	0	7.85	0.35	5.065797019100886	3.458357183691462e-08
S13	clarinette	orchestral_excerpt_unplayed	47.09	62.6	23.54	23.54	0	0	0	7.85	0.35	5.065797019100886	7.786286526113538e-10
S13	clarinette	orchestral_excerpt_unplayed	31.39	61.9	23.54	7.85	0	0	0	7.85	0.35	5.065797019100886	3.279174438705392e-10
S13	clarinette	orchestral_excerpt_unplayed	47.09	62.6	47.09	0	0	0	0	7.85	0.35	5.065797019100886	2.05123679000264e-10
S13	clarinette	orchestral_excerpt_unplayed	70.63	62.1	62.78	7.85	0	0	0	7.85	0.35	5.065797019100886	4.98853843037426e-10
S13	clarinette	orchestral_excerpt_played	2526.96	92.7	1679.41	580.73	266.82	0	0	7.85	0.35	5.065797019100886	1.692883318996065e-07
S13	clarinette	orchestral_excerpt_played	3452.99	91.59999999999999	2267.99	871.1	306.06	7.85	0	7.85	0.35	5.065797019100886	2.35744864978053e-07
S13	clarinette	orchestral_excerpt_played	1954.08	95.5	1451.83	392.39	109.87	0	0	7.85	0.35	5.065797019100886	7.74201666961055e-08
S13	clarinette	orchestral_excerpt_played	3327.43	92.8	2315.07	753.38	251.13	7.85	0	7.85	0.35	5.065797019100886	2.02655784737292e-07
S13	clarinette	orchestral_excerpt_played	3507.92	94.09999999999999	2197.36	949.5700000000001	345.3	7.85	7.85	7.85	0.35	5.065797019100886	4.844133897695247e-07
S13	clarinette	piano	2966.43	70.40000000000001	2307.22	612.12	47.09	0	0	23.54	0.35	5.065797019100886	5.32692572869377e-08
S13	clarinette	piano	6945.22	69.3	5344.29	1530.3	70.63	0	0	23.54	0.35	5.065797019100886	1.056865702313089e-07
S13	clarinette	piano	7580.88	69.90000000000001	5720.98	1695.1	164.8	0	0	23.54	0.35	5.065797019100886	1.633409471051555e-07
S13	clarinette	piano	2801.63	70.7	2189.51	565.03	47.09	0	0	23.54	0.35	5.065797019100886	5.14043144632146e-08
S13	clarinette	piano	3507.92	67.5	2895.8	565.03	47.09	0	0	23.54	0.35	5.065797019100886	5.448116964821856e-08
S13	clarinette	forte	6898.13	83.7	5273.66	1483.22	141.26	0	0	23.54	0.35	5.065797019100886	1.424874408991355e-07
S13	clarinette	forte	7439.62	83.8	5720.98	1530.3	188.34	0	0	23.54	0.35	5.065797019100886	1.714287093508935e-07
S13	clarinette	forte	12878.08	85.8	10288.34	2377.85	211.89	0	0	23.54	0.35	5.065797019100886	2.284843414234395e-07
S13	clarinette	forte	11795.1	85.40000000000001	9746.85	1954.08	94.17	0	0	23.54	0.35	5.065797019100886	1.498550667913521e-07
S13	clarinette	forte	8428.43	86.09999999999999	6803.96	1483.22	141.26	0	0	23.54	0.35	5.065797019100886	1.491539604666441e-07
S14	clarinette	breathing	0	61.4	0	0	0	0	0	7.85	0.35	5.065797019100886	0
S14	clarinette	breathing	7.85	61.4	7.85	0	0	0	0	7.85	0.35	5.065797019100886	3.418727983337734e-11
S14	clarinette	breathing	0	61.4	0	0	0	0	0	7.85	0.35	5.065797019100886	0
S14	clarinette	breathing	7.85	61.4	7.85	0	0	0	0	7.85	0.35	5.065797019100886	3.418727983337734e-11
S14	clarinette	breathing	109.87	61.4	47.09	62.78	0	0	0	7.85	0.35	5.065797019100886	2.007968513963522e-09
S14	clarinette	speaking	47.09	65.90000000000001	47.09	0	0	0	0	7.85	0.35	5.065797019100886	2.05123679000264e-10
S14	clarinette	speaking	102.02	65.40000000000001	94.17	0	7.85	0	0	7.85	0.35	5.065797019100886	4.683657337172694e-09
S14	clarinette	speaking	149.11	66.7	78.48	47.09	23.54	0	0	7.85	0.35	5.065797019100886	1.451423636207271e-08
S14	clarinette	speaking	94.17	67.3	86.31999999999999	7.85	0	0	0	7.85	0.35	5.065797019100886	6.01415682537558e-10
S14	clarinette	speaking	133.41	68.59999999999999	94.17	31.39	7.85	0	0	7.85	0.35	5.065797019100886	5.585079754654323e-09
S14	clarinette	ode_unplayed	180.5	62.3	156.95	23.54	0	0	0	7.85	0.35	5.065797019100886	1.359812409778769e-09
S14	clarinette	ode_unplayed	0	61.6	0	0	0	0	0	7.85	0.35	5.065797019100886	0
S14	clarinette	ode_unplayed	7.85	61.5	0	7.85	0	0	0	7.85	0.35	5.065797019100886	2.253556043704072e-10
S14	clarinette	ode_unplayed	0	62.6	0	0	0	0	0	7.85	0.35	5.065797019100886	0
S14	clarinette	ode_unplayed	0	62.7	0	0	0	0	0	7.85	0.35	5.065797019100886	0
S14	clarinette	ode_played	2173.81	82.7	1734.34	400.23	39.24	0	0	7.85	0.35	5.065797019100886	4.041557456192799e-08
S14	clarinette	ode_played	2220.9	87	1710.8	423.78	86.31999999999999	0	0	7.85	0.35	5.065797019100886	6.662953941057208e-08
S14	clarinette	ode_played	2315.07	88.5	1773.58	431.62	109.87	0	0	7.85	0.35	5.065797019100886	7.9948623191126e-08
S14	clarinette	ode_played	1569.54	86.59999999999999	1106.53	376.69	86.31999999999999	0	0	7.85	0.35	5.065797019100886	6.264498523717958e-08
S14	clarinette	ode_played	1593.08	88.09999999999999	1224.24	282.52	86.31999999999999	0	0	7.85	0.35	5.065797019100886	6.045352718223535e-08
S14	clarinette	orchestral_excerpt_unplayed	39.24	61.5	31.39	7.85	0	0	0	7.85	0.35	5.065797019100886	3.621047237039166e-10
S14	clarinette	orchestral_excerpt_unplayed	15.7	62.2	7.85	7.85	0	0	0	7.85	0.35	5.065797019100886	2.595428842037846e-10
S14	clarinette	orchestral_excerpt_unplayed	7.85	62.4	7.85	0	0	0	0	7.85	0.35	5.065797019100886	3.418727983337734e-11
S14	clarinette	orchestral_excerpt_unplayed	549.34	61	423.78	86.31999999999999	39.24	0	0	7.85	0.35	5.065797019100886	2.569207465493768e-08
S14	clarinette	orchestral_excerpt_unplayed	47.09	61.7	31.39	7.85	7.85	0	0	7.85	0.35	5.065797019100886	4.635514702876083e-09
S14	clarinette	orchestral_excerpt_played	1852.06	89.8	1271.33	510.1	70.63	0	0	7.85	0.35	5.065797019100886	5.86471434296331e-08
S14	clarinette	orchestral_excerpt_played	2472.03	90.90000000000001	1757.89	612.12	102.02	0	0	7.85	0.35	5.065797019100886	8.079001755280644e-08
S14	clarinette	orchestral_excerpt_played	2464.18	88.7	1710.8	643.51	109.87	0	0	7.85	0.35	5.065797019100886	8.575972627045998e-08
S14	clarinette	orchestral_excerpt_played	2299.38	90.59999999999999	1648.02	549.34	102.02	0	0	7.85	0.35	5.065797019100886	7.850855080017591e-08
S14	clarinette	orchestral_excerpt_played	2134.58	89.2	1616.63	439.47	78.48	0	0	7.85	0.35	5.065797019100886	6.23965932821402e-08
S14	clarinette	piano	4779.25	71.8	3672.73	1059.44	47.09	0	0	23.54	0.35	5.065797019100886	7.206311342705857e-08
S14	clarinette	piano	3107.69	70.40000000000001	2424.94	612.12	70.63	0	0	23.54	0.35	5.065797019100886	6.660229642195487e-08
S14	clarinette	piano	3037.06	71.59999999999999	2354.31	635.66	47.09	0	0	23.54	0.35	5.065797019100886	5.415044777904918e-08
S14	clarinette	piano	3084.15	71.7	2448.48	565.03	70.63	0	0	23.54	0.35	5.065797019100886	6.535272463523255e-08
S14	clarinette	piano	2048.25	71.3	1530.3	517.95	0	0	0	23.54	0.35	5.065797019100886	2.153998945595546e-08
S14	clarinette	forte	4190.67	77.7	3366.66	706.29	117.72	0	0	23.54	0.35	5.065797019100886	9.904949712943802e-08
S14	clarinette	forte	2683.91	77.90000000000001	2260.14	400.23	23.54	0	0	23.54	0.35	5.065797019100886	3.415930235241995e-08
S14	clarinette	forte	5979.95	78.5	4685.08	1082.98	211.89	0	0	23.54	0.35	5.065797019100886	1.66890948901291e-07
S14	clarinette	forte	3460.84	78.3	2660.37	753.38	47.09	0	0	23.54	0.35	5.065797019100886	5.886408575810701e-08
S14	clarinette	forte	5509.09	79.3	4708.62	682.75	94.17	0	23.54	23.54	0.35	5.065797019100886	7.674660383415391e-07
S15	clarinette	breathing	23.54	62.7	15.7	7.85	0	0	0	7.85	0.35	5.065797019100886	2.937301640371619e-10
S15	clarinette	breathing	23.54	62.7	15.7	7.85	0	0	0	7.85	0.35	5.065797019100886	2.937301640371619e-10
S15	clarinette	breathing	15.7	62.7	15.7	0	0	0	0	7.85	0.35	5.065797019100886	6.837455966675468e-11
S15	clarinette	breathing	7.85	62.7	7.85	0	0	0	0	7.85	0.35	5.065797019100886	3.418727983337734e-11
S15	clarinette	breathing	7.85	62.7	7.85	0	0	0	0	7.85	0.35	5.065797019100886	3.418727983337734e-11
S15	clarinette	speaking	70.63	66	62.78	7.85	0	0	0	7.85	0.35	5.065797019100886	4.98853843037426e-10
S15	clarinette	speaking	7.85	63.9	7.85	0	0	0	0	7.85	0.35	5.065797019100886	3.418727983337734e-11
S15	clarinette	speaking	31.39	64.59999999999999	15.7	7.85	7.85	0	0	7.85	0.35	5.065797019100886	4.567140143209328e-09
S15	clarinette	speaking	7.85	65.3	7.85	0	0	0	0	7.85	0.35	5.065797019100886	3.418727983337734e-11
S15	clarinette	speaking	23.54	65.7	15.7	7.85	0	0	0	7.85	0.35	5.065797019100886	2.937301640371619e-10
S15	clarinette	ode_unplayed	15.7	61.6	7.85	7.85	0	0	0	7.85	0.35	5.065797019100886	2.595428842037846e-10
S15	clarinette	ode_unplayed	0	61.4	0	0	0	0	0	7.85	0.35	5.065797019100886	0
S15	clarinette	ode_unplayed	0	61.8	0	0	0	0	0	7.85	0.35	5.065797019100886	0
S15	clarinette	ode_unplayed	31.39	61.3	31.39	0	0	0	0	7.85	0.35	5.065797019100886	1.367491193335094e-10
S15	clarinette	ode_unplayed	31.39	61.7	23.54	7.85	0	0	0	7.85	0.35	5.065797019100886	3.279174438705392e-10
S15	clarinette	ode_played	353.15	88.5	258.97	62.78	31.39	0	0	7.85	0.35	5.065797019100886	2.002466498615338e-08
S15	clarinette	ode_played	502.25	86.5	384.54	70.63	47.09	0	0	7.85	0.35	5.065797019100886	2.934383702620215e-08
S15	clarinette	ode_played	549.34	86.59999999999999	368.84	141.26	39.24	0	0	7.85	0.35	5.065797019100886	2.703025292669689e-08
S15	clarinette	ode_played	439.47	88.3	321.76	86.31999999999999	31.39	0	0	7.85	0.35	5.065797019100886	2.097423003793161e-08
S15	clarinette	ode_played	251.13	89.7	172.65	78.48	0	0	0	7.85	0.35	5.065797019100886	3.005676200038374e-09
S15	clarinette	orchestral_excerpt_unplayed	23.54	62.6	15.7	7.85	0	0	0	7.85	0.35	5.065797019100886	2.937301640371619e-10
S15	clarinette	orchestral_excerpt_unplayed	0	61.4	0	0	0	0	0	7.85	0.35	5.065797019100886	0
S15	clarinette	orchestral_excerpt_unplayed	23.54	61.7	7.85	15.7	0	0	0	7.85	0.35	5.065797019100886	4.848984885741918e-10
S15	clarinette	orchestral_excerpt_unplayed	31.39	62	31.39	0	0	0	0	7.85	0.35	5.065797019100886	1.367491193335094e-10
S15	clarinette	orchestral_excerpt_unplayed	7.85	62	7.85	0	0	0	0	7.85	0.35	5.065797019100886	3.418727983337734e-11
S15	clarinette	orchestral_excerpt_played	204.04	94.8	133.41	31.39	39.24	0	0	7.85	0.35	5.065797019100886	2.284965607050987e-08
S15	clarinette	orchestral_excerpt_played	266.82	94.3	188.34	47.09	31.39	0	0	7.85	0.35	5.065797019100886	1.926626825891216e-08
S15	clarinette	orchestral_excerpt_played	109.87	94.2	94.17	15.7	0	0	0	7.85	0.35	5.065797019100886	8.609585667413426e-10
S15	clarinette	orchestral_excerpt_played	117.72	93.7	70.63	39.24	7.85	0	0	7.85	0.35	5.065797019100886	5.707873519524598e-09
S15	clarinette	orchestral_excerpt_played	251.13	94.40000000000001	196.19	39.24	15.7	0	0	7.85	0.35	5.065797019100886	1.05282799760308e-08
S15	clarinette	piano	164.8	73.09999999999999	141.26	0	23.54	0	0	23.54	0.35	5.065797019100886	1.343560097451729e-08
S15	clarinette	piano	141.26	71.5	94.17	47.09	0	0	0	23.54	0.35	5.065797019100886	1.762380984222972e-09
S15	clarinette	piano	117.72	71	117.72	0	0	0	0	23.54	0.35	5.065797019100886	5.128091975006602e-10
S15	clarinette	piano	329.6	72.2	282.52	47.09	0	0	0	23.54	0.35	5.065797019100886	2.582875700224028e-09
S15	clarinette	piano	164.8	69.5	164.8	0	0	0	0	23.54	0.35	5.065797019100886	7.179328765009242e-10
S15	clarinette	forte	612.12	84.3	470.86	70.63	70.63	0	0	23.54	0.35	5.065797019100886	4.25401270418858e-08
S15	clarinette	forte	894.64	83	706.29	164.8	23.54	0	0	23.54	0.35	5.065797019100886	2.062955281429901e-08
S15	clarinette	forte	824.01	81.09999999999999	447.32	282.52	94.17	0	0	23.54	0.35	5.065797019100886	6.134239645790317e-08
S15	clarinette	forte	1506.76	79.09999999999999	1365.5	117.72	23.54	0	0	23.54	0.35	5.065797019100886	2.214915069408026e-08
S15	clarinette	forte	918.1799999999999	81.5	776.92	94.17	47.09	0	0	23.54	0.35	5.065797019100886	3.172926783098224e-08
S16	clarinette	breathing	0	62.2	0	0	0	0	0	7.85	0.35	5.065797019100886	0
S16	clarinette	breathing	7.85	62.2	0	7.85	0	0	0	7.85	0.35	5.065797019100886	2.253556043704072e-10
S16	clarinette	breathing	0	62.2	0	0	0	0	0	7.85	0.35	5.065797019100886	0
S16	clarinette	breathing	0	62.2	0	0	0	0	0	7.85	0.35	5.065797019100886	0
S16	clarinette	breathing	23.54	62.2	7.85	0	15.7	0	0	7.85	0.35	5.065797019100886	8.581007238177709e-09
S16	clarinette	speaking	125.56	63	102.02	23.54	0	0	0	7.85	0.35	5.065797019100886	1.120501450945127e-09
S16	clarinette	speaking	47.09	64.8	47.09	0	0	0	0	7.85	0.35	5.065797019100886	2.05123679000264e-10
S16	clarinette	speaking	70.63	64	31.39	31.39	7.85	0	0	7.85	0.35	5.065797019100886	5.311581515987304e-09
S16	clarinette	speaking	94.17	63.9	39.24	47.09	7.85	0	0	7.85	0.35	5.065797019100886	5.796480004561497e-09
S16	clarinette	speaking	164.8	64.09999999999999	109.87	47.09	7.85	0	0	7.85	0.35	5.065797019100886	6.104165523061893e-09
S16	clarinette	ode_unplayed	7.85	62	0	0	7.85	0	0	7.85	0.35	5.065797019100886	4.273409979172167e-09
S16	clarinette	ode_unplayed	0	61.3	0	0	0	0	0	7.85	0.35	5.065797019100886	0
S16	clarinette	ode_unplayed	0	61.3	0	0	0	0	0	7.85	0.35	5.065797019100886	0
S16	clarinette	ode_unplayed	39.24	62.4	39.24	0	0	0	0	7.85	0.35	5.065797019100886	1.709363991668867e-10
S16	clarinette	ode_unplayed	0	62.1	0	0	0	0	0	7.85	0.35	5.065797019100886	0
S16	clarinette	ode_played	2676.07	85.5	1828.51	651.36	196.19	0	0	7.85	0.35	5.065797019100886	1.335054008432249e-07
S16	clarinette	ode_played	2307.22	85.8	1781.43	415.93	109.87	0	0	7.85	0.35	5.065797019100886	7.953209926221856e-08
S16	clarinette	ode_played	1459.67	85.5	1130.07	243.28	86.31999999999999	0	0	7.85	0.35	5.065797019100886	5.891650180238278e-08
S16	clarinette	ode_played	2597.59	85.2	2001.16	502.25	94.17	0	0	7.85	0.35	5.065797019100886	7.442143478728328e-08
S16	clarinette	ode_played	1695.1	86.90000000000001	1302.72	306.06	86.31999999999999	0	0	7.85	0.35	5.065797019100886	6.147146679368034e-08
S16	clarinette	orchestral_excerpt_unplayed	7.85	62.9	0	7.85	0	0	0	7.85	0.35	5.065797019100886	2.253556043704072e-10
S16	clarinette	orchestral_excerpt_unplayed	0	61.9	0	0	0	0	0	7.85	0.35	5.065797019100886	0
S16	clarinette	orchestral_excerpt_unplayed	0	62.3	0	0	0	0	0	7.85	0.35	5.065797019100886	0
S16	clarinette	orchestral_excerpt_unplayed	164.8	61.7	86.31999999999999	54.93	23.54	0	0	7.85	0.35	5.065797019100886	1.47737792462765e-08
S16	clarinette	orchestral_excerpt_unplayed	0	61.8	0	0	0	0	0	7.85	0.35	5.065797019100886	0
S16	clarinette	orchestral_excerpt_played	2228.75	94.3	1671.56	447.32	109.87	0	0	7.85	0.35	5.065797019100886	7.995489976203292e-08
S16	clarinette	orchestral_excerpt_played	2472.03	94.40000000000001	1742.19	565.03	164.8	0	0	7.85	0.35	5.065797019100886	1.135567892002946e-07
S16	clarinette	orchestral_excerpt_played	1436.13	93.90000000000001	1004.51	306.06	117.72	7.85	0	7.85	0.35	5.065797019100886	1.11453269910078e-07
S16	clarinette	orchestral_excerpt_played	1451.83	93.5	1020.2	298.21	133.41	0	0	7.85	0.35	5.065797019100886	8.565582899034135e-08
S16	clarinette	orchestral_excerpt_played	3037.06	93.40000000000001	2142.42	745.53	141.26	0	7.85	7.85	0.35	5.065797019100886	3.330188938052068e-07
S16	clarinette	piano	1341.96	70.5	988.8099999999999	282.52	70.63	0	0	23.54	0.35	5.065797019100886	5.08810888288897e-08
S16	clarinette	piano	824.01	69.90000000000001	635.66	188.34	0	0	0	23.54	0.35	5.065797019100886	8.177704171393337e-09
S16	clarinette	piano	353.15	70.09999999999999	188.34	164.8	0	0	0	23.54	0.35	5.065797019100886	5.552962407779608e-09
S16	clarinette	piano	1365.5	70.90000000000001	1012.35	329.6	23.54	0	0	23.54	0.35	5.065797019100886	2.669532441957928e-08
S16	clarinette	piano	47.09	67.90000000000001	47.09	0	0	0	0	23.54	0.35	5.065797019100886	2.05123679000264e-10
S16	clarinette	forte	3484.38	86.09999999999999	2778.09	682.75	23.54	0	0	23.54	0.35	5.065797019100886	4.452846457875751e-08
S16	clarinette	forte	2966.43	81.7	2424.94	447.32	94.17	0	0	23.54	0.35	5.065797019100886	7.469005866769281e-08
S16	clarinette	forte	1859.91	80.59999999999999	1648.02	141.26	70.63	0	0	23.54	0.35	5.065797019100886	4.969641945622607e-08
S16	clarinette	forte	2754.54	81.3	2142.42	612.12	0	0	0	23.54	0.35	5.065797019100886	2.691086453540378e-08
S16	clarinette	forte	1836.36	81.40000000000001	1553.85	258.97	23.54	0	0	23.54	0.35	5.065797019100886	2.702604628874865e-08
S17	clarinette	breathing	78.48	62.4	54.93	15.7	7.85	0	0	7.85	0.35	5.065797019100886	4.963432146746622e-09
S17	clarinette	breathing	102.02	62.4	70.63	23.54	7.85	0	0	7.85	0.35	5.065797019100886	5.257162310783784e-09
S17	clarinette	breathing	62.78	62.4	54.93	7.85	0	0	0	7.85	0.35	5.065797019100886	4.646665632040486e-10
S17	clarinette	breathing	39.24	62.4	23.54	15.7	0	0	0	7.85	0.35	5.065797019100886	5.532730482409465e-10
S17	clarinette	breathing	54.93	62.4	54.93	0	0	0	0	7.85	0.35	5.065797019100886	2.393109588336414e-10
S17	clarinette	speaking	258.97	66.09999999999999	156.95	70.63	31.39	0	0	7.85	0.35	5.065797019100886	1.980558595268988e-08
S17	clarinette	speaking	2307.22	67.09999999999999	1553.85	682.75	70.63	0	0	7.85	0.35	5.065797019100886	6.483570879978363e-08
S17	clarinette	speaking	3413.75	67.5	2472.03	800.47	141.26	0	0	7.85	0.35	5.065797019100886	1.106766444183944e-07
S17	clarinette	speaking	470.86	66.40000000000001	392.39	54.93	23.54	0	0	7.85	0.35	5.065797019100886	1.610708315977821e-08
S17	clarinette	speaking	572.88	67.2	455.17	94.17	23.54	0	0	7.85	0.35	5.065797019100886	1.750735942029727e-08
S17	clarinette	ode_unplayed	23.54	61.4	23.54	0	0	0	0	7.85	0.35	5.065797019100886	1.02561839500132e-10
S17	clarinette	ode_unplayed	15.7	62.5	15.7	0	0	0	0	7.85	0.35	5.065797019100886	6.837455966675468e-11
S17	clarinette	ode_unplayed	0	61.7	0	0	0	0	0	7.85	0.35	5.065797019100886	0
S17	clarinette	ode_unplayed	0	62	0	0	0	0	0	7.85	0.35	5.065797019100886	0
S17	clarinette	ode_unplayed	7.85	62.2	0	7.85	0	0	0	7.85	0.35	5.065797019100886	2.253556043704072e-10
S17	clarinette	ode_played	2244.44	85.09999999999999	1546	565.03	133.41	0	0	7.85	0.35	5.065797019100886	9.560846728777147e-08
S17	clarinette	ode_played	2079.64	85.59999999999999	1334.11	588.58	156.95	0	0	7.85	0.35	5.065797019100886	1.08181707482898e-07
S17	clarinette	ode_played	2111.03	84.7	1483.22	541.49	86.31999999999999	0	0	7.85	0.35	5.065797019100886	6.901844236096024e-08
S17	clarinette	ode_played	1726.49	85.90000000000001	1232.09	400.23	94.17	0	0	7.85	0.35	5.065797019100886	6.8141458506797e-08
S17	clarinette	ode_played	2126.73	87.09999999999999	1593.08	463.01	70.63	0	0	7.85	0.35	5.065797019100886	5.869668827657912e-08
S17	clarinette	orchestral_excerpt_unplayed	125.56	61.3	94.17	31.39	0	0	0	7.85	0.35	5.065797019100886	1.311669775482157e-09
S17	clarinette	orchestral_excerpt_unplayed	109.87	61.7	94.17	15.7	0	0	0	7.85	0.35	5.065797019100886	8.609585667413426e-10
S17	clarinette	orchestral_excerpt_unplayed	23.54	61.8	15.7	7.85	0	0	0	7.85	0.35	5.065797019100886	2.937301640371619e-10
S17	clarinette	orchestral_excerpt_unplayed	0	61.5	0	0	0	0	0	7.85	0.35	5.065797019100886	0
S17	clarinette	orchestral_excerpt_unplayed	7.85	62.5	0	7.85	0	0	0	7.85	0.35	5.065797019100886	2.253556043704072e-10
S17	clarinette	orchestral_excerpt_played	1302.72	94.90000000000001	941.72	235.43	125.56	0	0	7.85	0.35	5.065797019100886	7.923770137787216e-08
S17	clarinette	orchestral_excerpt_played	1679.41	94.09999999999999	1326.26	313.91	39.24	0	0	7.85	0.35	5.065797019100886	3.615892436251789e-08
S17	clarinette	orchestral_excerpt_played	1287.02	91.09999999999999	1028.05	211.89	47.09	0	0	7.85	0.35	5.065797019100886	3.620359485120642e-08
S17	clarinette	orchestral_excerpt_played	1192.85	91.90000000000001	910.33	219.74	62.78	0	0	7.85	0.35	5.065797019100886	4.44629612164205e-08
S17	clarinette	orchestral_excerpt_played	824.01	91.2	643.51	141.26	39.24	0	0	7.85	0.35	5.065797019100886	2.82268077208651e-08
S17	clarinette	piano	306.06	78.40000000000001	211.89	94.17	0	0	0	23.54	0.35	5.065797019100886	3.627323807946075e-09
S17	clarinette	piano	1035.9	77.3	918.1799999999999	94.17	23.54	0	0	23.54	0.35	5.065797019100886	1.952440893046653e-08
S17	clarinette	piano	376.69	76.5	258.97	117.72	0	0	0	23.54	0.35	5.065797019100886	4.508514300057561e-09
S17	clarinette	piano	541.49	75.3	494.41	47.09	0	0	0	23.54	0.35	5.065797019100886	3.505932255725216e-09
S17	clarinette	piano	470.86	77.7	447.32	23.54	0	0	0	23.54	0.35	5.065797019100886	2.62474176361373e-09
S17	clarinette	forte	2236.6	88.7	1671.56	517.95	47.09	0	0	23.54	0.35	5.065797019100886	4.779582036798925e-08
S17	clarinette	forte	1718.65	89.2	1247.78	400.23	70.63	0	0	23.54	0.35	5.065797019100886	5.538960312894726e-08
S17	clarinette	forte	1412.59	88.5	941.72	400.23	70.63	0	0	23.54	0.35	5.065797019100886	5.405629921544555e-08
S17	clarinette	forte	941.72	86.3	659.21	235.43	47.09	0	0	23.54	0.35	5.065797019100886	3.527285951214891e-08
S17	clarinette	forte	1318.41	85.59999999999999	1035.9	258.97	23.54	0	0	23.54	0.35	5.065797019100886	2.476968581974575e-08
S18	trumpet	breathing	0	63	0	0	0	0	0	7.85	0.35	5.065797019100886	0
S18	trumpet	breathing	0	63	0	0	0	0	0	7.85	0.35	5.065797019100886	0
S18	trumpet	breathing	0	63	0	0	0	0	0	7.85	0.35	5.065797019100886	0
S18	trumpet	breathing	0	63	0	0	0	0	0	7.85	0.35	5.065797019100886	0
S18	trumpet	breathing	0	63	0	0	0	0	0	7.85	0.35	5.065797019100886	0
S18	trumpet	speaking	7.85	68.7	0	7.85	0	0	0	7.85	0.35	5.065797019100886	2.253556043704072e-10
S18	trumpet	speaking	23.54	68.40000000000001	23.54	0	0	0	0	7.85	0.35	5.065797019100886	1.02561839500132e-10
S18	trumpet	speaking	15.7	66.90000000000001	0	15.7	0	0	0	7.85	0.35	5.065797019100886	4.507112087408144e-10
S18	trumpet	speaking	39.24	66.90000000000001	23.54	7.85	7.85	0	0	7.85	0.35	5.065797019100886	4.601327423042705e-09
S18	trumpet	speaking	23.54	68.5	15.7	7.85	0	0	0	7.85	0.35	5.065797019100886	2.937301640371619e-10
S18	trumpet	ode_unplayed	7.85	63	7.85	0	0	0	0	7.85	0.35	5.065797019100886	3.418727983337734e-11
S18	trumpet	ode_unplayed	0	61.6	0	0	0	0	0	7.85	0.35	5.065797019100886	0
S18	trumpet	ode_unplayed	0	61.9	0	0	0	0	0	7.85	0.35	5.065797019100886	0
S18	trumpet	ode_unplayed	15.7	62.2	0	15.7	0	0	0	7.85	0.35	5.065797019100886	4.507112087408144e-10
S18	trumpet	ode_unplayed	0	62.2	0	0	0	0	0	7.85	0.35	5.065797019100886	0
S18	trumpet	ode_played	2220.9	89.59999999999999	1553.85	525.8	141.26	0	0	7.85	0.35	5.065797019100886	9.878928652492498e-08
S18	trumpet	ode_played	1836.36	91.5	1279.18	447.32	109.87	0	0	7.85	0.35	5.065797019100886	7.824553577036404e-08
S18	trumpet	ode_played	1396.89	91.90000000000001	1075.14	258.97	62.78	0	0	7.85	0.35	5.065797019100886	4.630767211477346e-08
S18	trumpet	ode_played	2009.01	93.40000000000001	1522.45	408.08	78.48	0	0	7.85	0.35	5.065797019100886	6.108492350665804e-08
S18	trumpet	ode_played	2322.92	94.59999999999999	1702.95	494.41	125.56	0	0	7.85	0.35	5.065797019100886	8.99906024659332e-08
S18	trumpet	orchestral_excerpt_unplayed	15.7	62.1	15.7	0	0	0	0	7.85	0.35	5.065797019100886	6.837455966675468e-11
S18	trumpet	orchestral_excerpt_unplayed	0	62.2	0	0	0	0	0	7.85	0.35	5.065797019100886	0
S18	trumpet	orchestral_excerpt_unplayed	0	60.9	0	0	0	0	0	7.85	0.35	5.065797019100886	0
S18	trumpet	orchestral_excerpt_unplayed	0	62.8	0	0	0	0	0	7.85	0.35	5.065797019100886	0
S18	trumpet	orchestral_excerpt_unplayed	7.85	61.7	7.85	0	0	0	0	7.85	0.35	5.065797019100886	3.418727983337734e-11
S18	trumpet	orchestral_excerpt_played	3664.88	98.90000000000001	2731	698.45	235.43	0	0	7.85	0.35	5.065797019100886	1.601561215461465e-07
S18	trumpet	orchestral_excerpt_played	3084.15	98	2220.9	721.99	141.26	0	0	7.85	0.35	5.065797019100886	1.073290954200222e-07
S18	trumpet	orchestral_excerpt_played	3335.27	97.7	2307.22	863.25	164.8	0	0	7.85	0.35	5.065797019100886	1.245817863143732e-07
S18	trumpet	orchestral_excerpt_played	3970.94	96.5	2809.48	926.03	235.43	0	0	7.85	0.35	5.065797019100886	1.670333068712221e-07
S18	trumpet	orchestral_excerpt_played	3044.91	98	2118.88	721.99	204.04	0	0	7.85	0.35	5.065797019100886	1.410719406155657e-07
S18	trumpet	piano	23.54	75.90000000000001	23.54	0	0	0	0	23.54	0.35	5.065797019100886	1.02561839500132e-10
S18	trumpet	piano	23.54	75.09999999999999	23.54	0	0	0	0	23.54	0.35	5.065797019100886	1.02561839500132e-10
S18	trumpet	piano	0	74.2	0	0	0	0	0	23.54	0.35	5.065797019100886	0
S18	trumpet	piano	70.63	75	70.63	0	0	0	0	23.54	0.35	5.065797019100886	3.076855185003961e-10
S18	trumpet	piano	47.09	75.59999999999999	23.54	23.54	0	0	0	23.54	0.35	5.065797019100886	7.786286526113538e-10
S18	trumpet	forte	1530.3	91.2	1106.53	329.6	94.17	0	0	23.54	0.35	5.065797019100886	6.55662615901293e-08
S18	trumpet	forte	635.66	92.09999999999999	541.49	94.17	0	0	0	23.54	0.35	5.065797019100886	5.063189560947924e-09
S18	trumpet	forte	776.92	89.7	659.21	70.63	47.09	0	0	23.54	0.35	5.065797019100886	3.054039182037036e-08
S18	trumpet	forte	1271.33	92.09999999999999	918.1799999999999	329.6	23.54	0	0	23.54	0.35	5.065797019100886	2.628507706157875e-08
S18	trumpet	forte	1130.07	92	894.64	164.8	70.63	0	0	23.54	0.35	5.065797019100886	4.709050740533306e-08
S19	trumpet	breathing	86.31999999999999	63	39.24	7.85	39.24	0	0	7.85	0.35	5.065797019100886	2.176334189939812e-08
S19	trumpet	breathing	39.24	63	23.54	15.7	0	0	0	7.85	0.35	5.065797019100886	5.532730482409465e-10
S19	trumpet	breathing	47.09	63	31.39	7.85	7.85	0	0	7.85	0.35	5.065797019100886	4.635514702876083e-09
S19	trumpet	breathing	7.85	63	0	0	7.85	0	0	7.85	0.35	5.065797019100886	4.273409979172167e-09
S19	trumpet	breathing	62.78	63	54.93	0	7.85	0	0	7.85	0.35	5.065797019100886	4.512720938005807e-09
S19	trumpet	speaking	156.95	65.5	102.02	47.09	7.85	0	0	7.85	0.35	5.065797019100886	6.069978243228515e-09
S19	trumpet	speaking	211.89	66.3	156.95	15.7	39.24	0	0	7.85	0.35	5.065797019100886	2.250150670126919e-08
S19	trumpet	speaking	156.95	67.3	102.02	23.54	31.39	0	0	7.85	0.35	5.065797019100886	1.821414136763379e-08
S19	trumpet	speaking	164.8	67.59999999999999	117.72	23.54	23.54	0	0	7.85	0.35	5.065797019100886	1.400910594812838e-08
S19	trumpet	speaking	188.34	67.09999999999999	133.41	39.24	15.7	0	0	7.85	0.35	5.065797019100886	1.025478173736378e-08
S19	trumpet	ode_unplayed	15.7	61.5	7.85	7.85	0	0	0	7.85	0.35	5.065797019100886	2.595428842037846e-10
S19	trumpet	ode_unplayed	0	61.6	0	0	0	0	0	7.85	0.35	5.065797019100886	0
S19	trumpet	ode_unplayed	23.54	62.4	23.54	0	0	0	0	7.85	0.35	5.065797019100886	1.02561839500132e-10
S19	trumpet	ode_unplayed	15.7	62.4	15.7	0	0	0	0	7.85	0.35	5.065797019100886	6.837455966675468e-11
S19	trumpet	ode_unplayed	15.7	62.8	0	15.7	0	0	0	7.85	0.35	5.065797019100886	4.507112087408144e-10
S19	trumpet	ode_played	643.51	91	502.25	86.31999999999999	54.93	0	0	7.85	0.35	5.065797019100886	3.458076741161579e-08
S19	trumpet	ode_played	910.33	91.90000000000001	729.84	125.56	54.93	0	0	7.85	0.35	5.065797019100886	3.669897654863577e-08
S19	trumpet	ode_played	839.7	93	651.36	117.72	70.63	0	0	7.85	0.35	5.065797019100886	4.467856810427592e-08
S19	trumpet	ode_played	541.49	92.90000000000001	384.54	109.87	47.09	0	0	7.85	0.35	5.065797019100886	3.047061504805419e-08
S19	trumpet	ode_played	1169.31	92.59999999999999	839.7	266.82	62.78	0	0	7.85	0.35	5.065797019100886	4.550740932414255e-08
S19	trumpet	orchestral_excerpt_unplayed	23.54	62	23.54	0	0	0	0	7.85	0.35	5.065797019100886	1.02561839500132e-10
S19	trumpet	orchestral_excerpt_unplayed	0	62.1	0	0	0	0	0	7.85	0.35	5.065797019100886	0
S19	trumpet	orchestral_excerpt_unplayed	7.85	61.9	7.85	0	0	0	0	7.85	0.35	5.065797019100886	3.418727983337734e-11
S19	trumpet	orchestral_excerpt_unplayed	0	63.3	0	0	0	0	0	7.85	0.35	5.065797019100886	0
S19	trumpet	orchestral_excerpt_unplayed	0	61.7	0	0	0	0	0	7.85	0.35	5.065797019100886	0
S19	trumpet	orchestral_excerpt_played	1381.2	97.3	1145.76	219.74	15.7	0	0	7.85	0.35	5.065797019100886	1.984811973638883e-08
S19	trumpet	orchestral_excerpt_played	1239.94	98.09999999999999	965.27	219.74	54.93	0	0	7.85	0.35	5.065797019100886	4.042886219608197e-08
S19	trumpet	orchestral_excerpt_played	2040.4	98.3	1553.85	415.93	70.63	0	0	7.85	0.35	5.065797019100886	5.717361825118979e-08
S19	trumpet	orchestral_excerpt_played	2118.88	98.09999999999999	1663.71	313.91	141.26	0	0	7.85	0.35	5.065797019100886	9.318330712459126e-08
S19	trumpet	orchestral_excerpt_played	1961.93	98.09999999999999	1569.54	306.06	86.31999999999999	0	0	7.85	0.35	5.065797019100886	6.263383430801518e-08
S19	trumpet	piano	23.54	82.7	23.54	0	0	0	0	23.54	0.35	5.065797019100886	1.02561839500132e-10
S19	trumpet	piano	0	78.8	0	0	0	0	0	23.54	0.35	5.065797019100886	0
S19	trumpet	piano	70.63	77.09999999999999	70.63	0	0	0	0	23.54	0.35	5.065797019100886	3.076855185003961e-10
S19	trumpet	piano	164.8	79.40000000000001	94.17	47.09	23.54	0	0	23.54	0.35	5.065797019100886	1.458261092173947e-08
S19	trumpet	piano	211.89	77.40000000000001	164.8	47.09	0	0	0	23.54	0.35	5.065797019100886	2.070066502723367e-09
S19	trumpet	forte	2660.37	95.09999999999999	2001.16	588.58	70.63	0	0	23.54	0.35	5.065797019100886	6.408011649784126e-08
S19	trumpet	forte	5038.23	96.8	3790.44	1200.7	47.09	0	0	23.54	0.35	5.065797019100886	7.663232350322656e-08
S19	trumpet	forte	4873.42	96.5	3955.24	871.1	47.09	0	0	23.54	0.35	5.065797019100886	6.788532099617038e-08
S19	trumpet	forte	8781.58	95.40000000000001	7368.99	1341.96	70.63	0	0	23.54	0.35	5.065797019100886	1.090983539234305e-07
S19	trumpet	forte	19470.15	98.2	17445.45	1954.08	70.63	0	0	23.54	0.35	5.065797019100886	1.705725583703787e-07
S20	trumpet	breathing	7.85	62.8	7.85	0	0	0	0	7.85	0.35	5.065797019100886	3.418727983337734e-11
S20	trumpet	breathing	23.54	62.8	15.7	0	7.85	0	0	7.85	0.35	5.065797019100886	4.341784538838921e-09
S20	trumpet	breathing	54.93	62.8	23.54	7.85	23.54	0	0	7.85	0.35	5.065797019100886	1.314814738138704e-08
S20	trumpet	breathing	15.7	62.8	0	0	15.7	0	0	7.85	0.35	5.065797019100886	8.546819958344333e-09
S20	trumpet	breathing	7.85	62.8	7.85	0	0	0	0	7.85	0.35	5.065797019100886	3.418727983337734e-11
S20	trumpet	speaking	102.02	64.7	86.31999999999999	15.7	0	0	0	7.85	0.35	5.065797019100886	8.267712869079653e-10
S20	trumpet	speaking	54.93	64.59999999999999	54.93	0	0	0	0	7.85	0.35	5.065797019100886	2.393109588336414e-10
S20	trumpet	speaking	47.09	64.7	47.09	0	0	0	0	7.85	0.35	5.065797019100886	2.05123679000264e-10
S20	trumpet	speaking	86.31999999999999	63.8	78.48	7.85	0	0	0	7.85	0.35	5.065797019100886	5.672284027041807e-10
S20	trumpet	speaking	125.56	65.2	109.87	15.7	0	0	0	7.85	0.35	5.065797019100886	9.293331264080973e-10
S20	trumpet	ode_unplayed	910.33	61.8	549.34	266.82	86.31999999999999	7.85	0	7.85	0.35	5.065797019100886	9.124998974120141e-08
S20	trumpet	ode_unplayed	769.0700000000001	62	439.47	211.89	117.72	0	0	7.85	0.35	5.065797019100886	7.210023867625261e-08
S20	trumpet	ode_unplayed	1067.29	61.3	525.8	306.06	235.43	0	0	7.85	0.35	5.065797019100886	1.392817156944471e-07
S20	trumpet	ode_unplayed	635.66	62.6	360.99	149.11	125.56	0	0	7.85	0.35	5.065797019100886	7.422893102212775e-08
S20	trumpet	ode_unplayed	596.4299999999999	61.7	321.76	164.8	109.87	0	0	7.85	0.35	5.065797019100886	6.596188587335735e-08
S20	trumpet	ode_played	3507.92	92	1789.28	949.5700000000001	769.0700000000001	0	0	7.85	0.35	5.065797019100886	4.538569058897016e-07
S20	trumpet	ode_played	2660.37	90.3	1396.89	651.36	596.4299999999999	15.7	0	7.85	0.35	5.065797019100886	4.179435690569242e-07
S20	trumpet	ode_played	3123.39	90.2	1718.65	816.16	588.58	0	0	7.85	0.35	5.065797019100886	3.514297455759444e-07
S20	trumpet	ode_played	2762.39	91.59999999999999	1287.02	878.9400000000001	588.58	7.85	0	7.85	0.35	5.065797019100886	3.855395698534493e-07
S20	trumpet	ode_played	2636.83	91.40000000000001	1443.98	682.75	510.1	0	0	7.85	0.35	5.065797019100886	3.036680457157576e-07
S20	trumpet	orchestral_excerpt_unplayed	180.5	62.9	102.02	15.7	62.78	0	0	7.85	0.35	5.065797019100886	3.508242567995205e-08
S20	trumpet	orchestral_excerpt_unplayed	298.21	62.1	188.34	62.78	47.09	0	0	7.85	0.35	5.065797019100886	2.826379942599731e-08
S20	trumpet	orchestral_excerpt_unplayed	1310.57	61.5	690.6	360.99	258.97	0	0	7.85	0.35	5.065797019100886	1.543973677390574e-07
S20	trumpet	orchestral_excerpt_unplayed	2252.29	62.7	1341.96	612.12	298.21	0	0	7.85	0.35	5.065797019100886	1.858133412009416e-07
S20	trumpet	orchestral_excerpt_unplayed	721.99	61.5	557.1900000000001	78.48	54.93	0	31.39	7.85	0.35	5.065797019100886	9.360171402477074e-07
S20	trumpet	orchestral_excerpt_played	10547.31	96.2	6529.29	2935.04	1082.98	0	0	7.85	0.35	5.065797019100886	7.024573899816612e-07
S20	trumpet	orchestral_excerpt_played	6262.47	96.7	3978.79	1530.3	745.53	7.85	0	7.85	0.35	5.065797019100886	5.014385215824848e-07
S20	trumpet	orchestral_excerpt_played	18928.66	96.90000000000001	10500.23	5705.28	2723.15	0	0	7.85	0.35	5.065797019100886	1.692449367567086e-06
S20	trumpet	orchestral_excerpt_played	24994.94	96.59999999999999	14306.36	7110.02	3570.71	7.85	0	7.85	0.35	5.065797019100886	2.245084409052549e-06
S20	trumpet	orchestral_excerpt_played	13796.26	96	8012.51	3704.12	2071.79	7.85	0	7.85	0.35	5.065797019100886	1.30364057230754e-06
S20	trumpet	piano	117.72	71.2	94.17	23.54	0	0	0	23.54	0.35	5.065797019100886	1.08631417111175e-09
S20	trumpet	piano	23.54	71.90000000000001	0	23.54	0	0	0	23.54	0.35	5.065797019100886	6.760668131112217e-10
S20	trumpet	piano	141.26	72.90000000000001	141.26	0	0	0	0	23.54	0.35	5.065797019100886	6.153710370007922e-10
S20	trumpet	piano	23.54	73	23.54	0	0	0	0	23.54	0.35	5.065797019100886	1.02561839500132e-10
S20	trumpet	piano	0	73.09999999999999	0	0	0	0	0	23.54	0.35	5.065797019100886	0
S20	trumpet	forte	4167.13	95.40000000000001	3507.92	635.66	23.54	0	0	23.54	0.35	5.065797019100886	4.635574797703915e-08
S20	trumpet	forte	2801.63	96.2	2213.05	470.86	117.72	0	0	23.54	0.35	5.065797019100886	8.726329886281934e-08
S20	trumpet	forte	2165.97	94.8	1695.1	423.78	47.09	0	0	23.54	0.35	5.065797019100886	4.51941149550445e-08
S20	trumpet	forte	2636.83	94	2330.77	258.97	47.09	0	0	23.54	0.35	5.065797019100886	4.32308169297695e-08
S20	trumpet	forte	2989.98	95.3	2401.4	494.41	94.17	0	0	23.54	0.35	5.065797019100886	7.593963045441511e-08
S21	trumpet	breathing	651.36	62	525.8	78.48	47.09	0	0	7.85	0.35	5.065797019100886	3.018456366757335e-08
S21	trumpet	breathing	470.86	62	415.93	47.09	7.85	0	0	7.85	0.35	5.065797019100886	7.437469436563609e-09
S21	trumpet	breathing	321.76	62	306.06	15.7	0	0	0	7.85	0.35	5.065797019100886	1.784015122242531e-09
S21	trumpet	breathing	94.17	62	94.17	0	0	0	0	7.85	0.35	5.065797019100886	4.102473580005281e-10
S21	trumpet	breathing	345.3	62	290.37	39.24	15.7	0	0	7.85	0.35	5.065797019100886	1.093852733403133e-08
S21	trumpet	speaking	486.56	65.40000000000001	353.15	86.31999999999999	47.09	0	0	7.85	0.35	5.065797019100886	2.965779911560945e-08
S21	trumpet	speaking	494.41	67.2	345.3	102.02	47.09	0	0	7.85	0.35	5.065797019100886	3.007432304451689e-08
S21	trumpet	speaking	808.3099999999999	65.09999999999999	588.58	149.11	70.63	0	0	7.85	0.35	5.065797019100886	4.530649228309053e-08
S21	trumpet	speaking	957.42	66.8	769.0700000000001	133.41	54.93	0	0	7.85	0.35	5.065797019100886	3.709526855217307e-08
S21	trumpet	speaking	698.45	67.90000000000001	572.88	94.17	31.39	0	0	7.85	0.35	5.065797019100886	2.22935785969701e-08
S21	trumpet	ode_unplayed	227.58	62	172.65	39.24	15.7	0	0	7.85	0.35	5.065797019100886	1.042571813653067e-08
S21	trumpet	ode_unplayed	62.78	61.6	62.78	0	0	0	0	7.85	0.35	5.065797019100886	2.734982386670187e-10
S21	trumpet	ode_unplayed	47.09	61.6	39.24	7.85	0	0	0	7.85	0.35	5.065797019100886	3.96292003537294e-10
S21	trumpet	ode_unplayed	39.24	61.7	39.24	0	0	0	0	7.85	0.35	5.065797019100886	1.709363991668867e-10
S21	trumpet	ode_unplayed	39.24	62	23.54	7.85	7.85	0	0	7.85	0.35	5.065797019100886	4.601327423042705e-09
S21	trumpet	ode_played	2723.15	92.7	2063.95	478.71	164.8	15.7	0	7.85	0.35	5.065797019100886	1.808541156921432e-07
S21	trumpet	ode_played	5877.93	92.3	3790.44	1420.43	619.97	47.09	0	7.85	0.35	5.065797019100886	6.000248879054301e-07
S21	trumpet	ode_played	2197.36	94.2	1467.52	447.32	243.28	39.24	0	7.85	0.35	5.065797019100886	3.226503992991786e-07
S21	trumpet	ode_played	7949.72	93.5	4371.17	2244.44	1271.33	54.93	7.85	7.85	0.35	5.065797019100886	1.240452997547067e-06
S21	trumpet	ode_played	7627.97	91.8	4025.87	2087.49	1498.91	15.7	0	7.85	0.35	5.065797019100886	9.620785310056891e-07
S21	trumpet	orchestral_excerpt_unplayed	78.48	62.6	70.63	7.85	0	0	0	7.85	0.35	5.065797019100886	5.330411228708034e-10
S21	trumpet	orchestral_excerpt_unplayed	31.39	61.9	31.39	0	0	0	0	7.85	0.35	5.065797019100886	1.367491193335094e-10
S21	trumpet	orchestral_excerpt_unplayed	141.26	62.5	109.87	31.39	0	0	0	7.85	0.35	5.065797019100886	1.380044335148912e-09
S21	trumpet	orchestral_excerpt_unplayed	47.09	61.9	39.24	7.85	0	0	0	7.85	0.35	5.065797019100886	3.96292003537294e-10
S21	trumpet	orchestral_excerpt_unplayed	54.93	62	54.93	0	0	0	0	7.85	0.35	5.065797019100886	2.393109588336414e-10
S21	trumpet	orchestral_excerpt_played	8153.76	96.2	5485.54	1687.26	926.03	39.24	15.7	7.85	0.35	5.065797019100886	1.198258348993185e-06
S21	trumpet	orchestral_excerpt_played	9134.73	96.90000000000001	6034.88	1954.08	1122.22	23.54	0	7.85	0.35	5.065797019100886	7.960630302018503e-07
S21	trumpet	orchestral_excerpt_played	10013.67	95.90000000000001	7290.52	1812.82	871.1	39.24	0	7.85	0.35	5.065797019100886	7.291020344297686e-07
S21	trumpet	orchestral_excerpt_played	25709.08	95.59999999999999	16174.12	6348.79	3021.37	133.41	31.39	7.85	0.35	5.065797019100886	3.380641684302577e-06
S21	trumpet	orchestral_excerpt_played	15208.85	96.7	10178.47	3233.25	1718.65	62.78	15.7	7.85	0.35	5.065797019100886	1.797273643791035e-06
S21	trumpet	piano	494.41	81.7	376.69	70.63	47.09	0	0	23.54	0.35	5.065797019100886	2.930964974636877e-08
S21	trumpet	piano	1695.1	78.09999999999999	871.1	494.41	306.06	0	23.54	23.54	0.35	5.065797019100886	8.607219934357763e-07
S21	trumpet	piano	2683.91	80.2	1153.61	1059.44	447.32	23.54	0	23.54	0.35	5.065797019100886	3.815947450384569e-07
S21	trumpet	piano	1106.53	79.59999999999999	776.92	211.89	117.72	0	0	23.54	0.35	5.065797019100886	7.357029170908785e-08
S21	trumpet	piano	753.38	78.59999999999999	635.66	70.63	47.09	0	0	23.54	0.35	5.065797019100886	3.043782998087023e-08
S21	trumpet	forte	21706.75	96.09999999999999	15609.08	4284.85	1695.1	70.63	47.09	23.54	0.35	5.065797019100886	2.773918359798856e-06
S21	trumpet	forte	14102.32	96.3	10806.29	1977.62	1294.87	23.54	0	23.54	0.35	5.065797019100886	9.115399826954426e-07
S21	trumpet	forte	28628.42	95	17916.31	7722.14	2942.89	23.54	23.54	23.54	0.35	5.065797019100886	2.680956869360997e-06
S21	trumpet	forte	39387.62	93.40000000000001	24390.66	10994.63	3884.61	117.72	0	23.54	0.35	5.065797019100886	3.05012440463596e-06
S21	trumpet	forte	14808.62	95.40000000000001	11512.58	2613.29	635.66	47.09	0	23.54	0.35	5.065797019100886	6.764660430841195e-07
S22	trumpet	breathing	15.7	61.9	15.7	0	0	0	0	7.85	0.35	5.065797019100886	6.837455966675468e-11
S22	trumpet	breathing	0	61.9	0	0	0	0	0	7.85	0.35	5.065797019100886	0
S22	trumpet	breathing	7.85	61.9	7.85	0	0	0	0	7.85	0.35	5.065797019100886	3.418727983337734e-11
S22	trumpet	breathing	7.85	61.9	7.85	0	0	0	0	7.85	0.35	5.065797019100886	3.418727983337734e-11
S22	trumpet	breathing	0	61.9	0	0	0	0	0	7.85	0.35	5.065797019100886	0
S22	trumpet	speaking	149.11	66.3	125.56	7.85	15.7	0	0	7.85	0.35	5.065797019100886	9.319172040048776e-09
S22	trumpet	speaking	541.49	67.8	415.93	70.63	54.93	0	0	7.85	0.35	5.065797019100886	3.375399612470783e-08
S22	trumpet	speaking	258.97	66.59999999999999	204.04	39.24	15.7	0	0	7.85	0.35	5.065797019100886	1.056246725586418e-08
S22	trumpet	speaking	266.82	66.7	196.19	47.09	23.54	0	0	7.85	0.35	5.065797019100886	1.502704555957338e-08
S22	trumpet	speaking	94.17	66.8	86.31999999999999	7.85	0	0	0	7.85	0.35	5.065797019100886	6.01415682537558e-10
S22	trumpet	ode_unplayed	54.93	61.3	31.39	15.7	7.85	0	0	7.85	0.35	5.065797019100886	4.86087030724649e-09
S22	trumpet	ode_unplayed	188.34	62.5	78.48	86.31999999999999	23.54	0	0	7.85	0.35	5.065797019100886	1.564101438392475e-08
S22	trumpet	ode_unplayed	7.85	62.1	0	7.85	0	0	0	7.85	0.35	5.065797019100886	2.253556043704072e-10
S22	trumpet	ode_unplayed	39.24	62	31.39	7.85	0	0	0	7.85	0.35	5.065797019100886	3.621047237039166e-10
S22	trumpet	ode_unplayed	39.24	62.2	39.24	0	0	0	0	7.85	0.35	5.065797019100886	1.709363991668867e-10
S22	trumpet	ode_played	1553.85	96.40000000000001	1216.39	258.97	78.48	0	0	7.85	0.35	5.065797019100886	5.546986311011858e-08
S22	trumpet	ode_played	2644.68	97.5	2220.9	345.3	70.63	0	7.85	7.85	0.35	5.065797019100886	2.834069409681003e-07
S22	trumpet	ode_played	2354.31	96.3	1977.62	337.45	39.24	0	0	7.85	0.35	5.065797019100886	3.967253540179943e-08
S22	trumpet	ode_played	1922.69	94.40000000000001	1475.37	408.08	39.24	0	0	7.85	0.35	5.065797019100886	3.951274993179694e-08
S22	trumpet	ode_played	1757.89	95.59999999999999	1412.59	266.82	78.48	0	0	7.85	0.35	5.065797019100886	5.654990071032343e-08
S22	trumpet	orchestral_excerpt_unplayed	102.02	62.2	102.02	0	0	0	0	7.85	0.35	5.065797019100886	4.444346378339054e-10
S22	trumpet	orchestral_excerpt_unplayed	117.72	61.6	117.72	0	0	0	0	7.85	0.35	5.065797019100886	5.128091975006602e-10
S22	trumpet	orchestral_excerpt_unplayed	23.54	61.8	23.54	0	0	0	0	7.85	0.35	5.065797019100886	1.02561839500132e-10
S22	trumpet	orchestral_excerpt_unplayed	23.54	61.7	15.7	7.85	0	0	0	7.85	0.35	5.065797019100886	2.937301640371619e-10
S22	trumpet	orchestral_excerpt_unplayed	23.54	62.6	15.7	7.85	0	0	0	7.85	0.35	5.065797019100886	2.937301640371619e-10
S22	trumpet	orchestral_excerpt_played	1412.59	94.2	1177.16	180.5	54.93	0	0	7.85	0.35	5.065797019100886	4.022514072973113e-08
S22	trumpet	orchestral_excerpt_played	1750.04	95.7	1302.72	345.3	102.02	0	0	7.85	0.35	5.065797019100886	7.114506477387671e-08
S22	trumpet	orchestral_excerpt_played	1600.93	94.5	1396.89	180.5	23.54	0	0	7.85	0.35	5.065797019100886	2.408874464837703e-08
S22	trumpet	orchestral_excerpt_played	1726.49	94.8	1498.91	180.5	47.09	0	0	7.85	0.35	5.065797019100886	3.735340922372743e-08
S22	trumpet	orchestral_excerpt_played	1271.33	92.90000000000001	1028.05	204.04	39.24	0	0	7.85	0.35	5.065797019100886	3.170482926766385e-08
S22	trumpet	piano	282.52	73.40000000000001	211.89	70.63	0	0	0	23.54	0.35	5.065797019100886	2.951256994834853e-09
S22	trumpet	piano	70.63	71	47.09	23.54	0	0	0	23.54	0.35	5.065797019100886	8.811904921114858e-10
S22	trumpet	piano	659.21	78	588.58	70.63	0	0	0	23.54	0.35	5.065797019100886	4.592246426836966e-09
S22	trumpet	piano	164.8	73.7	141.26	23.54	0	0	0	23.54	0.35	5.065797019100886	1.291437850112014e-09
S22	trumpet	piano	376.69	75	353.15	23.54	0	0	0	23.54	0.35	5.065797019100886	2.214494405613202e-09
S22	trumpet	forte	1530.3	94.2	1294.87	211.89	23.54	0	0	23.54	0.35	5.065797019100886	2.454573242802475e-08
S22	trumpet	forte	3154.78	93.5	2707.46	376.69	70.63	0	0	23.54	0.35	5.065797019100886	6.107237036484422e-08
S22	trumpet	forte	1059.44	93.59999999999999	871.1	164.8	23.54	0	0	23.54	0.35	5.065797019100886	2.134748569079994e-08
S22	trumpet	forte	1294.87	92.5	1153.61	141.26	0	0	0	23.54	0.35	5.065797019100886	9.0819310141738e-09
S22	trumpet	forte	1153.61	92.2	1012.35	141.26	0	0	0	23.54	0.35	5.065797019100886	8.466559977173007e-09
S23	trumpet	breathing	39.24	62.9	39.24	0	0	0	0	7.85	0.35	5.065797019100886	1.709363991668867e-10
S23	trumpet	breathing	23.54	62.9	15.7	7.85	0	0	0	7.85	0.35	5.065797019100886	2.937301640371619e-10
S23	trumpet	breathing	7.85	62.9	7.85	0	0	0	0	7.85	0.35	5.065797019100886	3.418727983337734e-11
S23	trumpet	breathing	7.85	62.9	7.85	0	0	0	0	7.85	0.35	5.065797019100886	3.418727983337734e-11
S23	trumpet	breathing	0	62.9	0	0	0	0	0	7.85	0.35	5.065797019100886	0
S23	trumpet	speaking	102.02	65.90000000000001	102.02	0	0	0	0	7.85	0.35	5.065797019100886	4.444346378339054e-10
S23	trumpet	speaking	62.78	65	62.78	0	0	0	0	7.85	0.35	5.065797019100886	2.734982386670187e-10
S23	trumpet	speaking	15.7	63.8	7.85	7.85	0	0	0	7.85	0.35	5.065797019100886	2.595428842037846e-10
S23	trumpet	speaking	15.7	63.7	15.7	0	0	0	0	7.85	0.35	5.065797019100886	6.837455966675468e-11
S23	trumpet	speaking	23.54	63.8	23.54	0	0	0	0	7.85	0.35	5.065797019100886	1.02561839500132e-10
S23	trumpet	ode_unplayed	86.31999999999999	62.1	78.48	7.85	0	0	0	7.85	0.35	5.065797019100886	5.672284027041807e-10
S23	trumpet	ode_unplayed	23.54	62.1	23.54	0	0	0	0	7.85	0.35	5.065797019100886	1.02561839500132e-10
S23	trumpet	ode_unplayed	0	62.3	0	0	0	0	0	7.85	0.35	5.065797019100886	0
S23	trumpet	ode_unplayed	15.7	61.8	15.7	0	0	0	0	7.85	0.35	5.065797019100886	6.837455966675468e-11
S23	trumpet	ode_unplayed	0	61.9	0	0	0	0	0	7.85	0.35	5.065797019100886	0
S23	trumpet	ode_played	1357.65	93.90000000000001	1263.48	94.17	0	0	0	7.85	0.35	5.065797019100886	8.208419305618639e-09
S23	trumpet	ode_played	886.79	94.90000000000001	769.0700000000001	86.31999999999999	31.39	0	0	7.85	0.35	5.065797019100886	2.292290498843412e-08
S23	trumpet	ode_played	855.4	95	745.53	94.17	15.7	0	0	7.85	0.35	5.065797019100886	1.449887879496007e-08
S23	trumpet	ode_played	690.6	94.59999999999999	565.03	102.02	23.54	0	0	7.85	0.35	5.065797019100886	1.821133694233496e-08
S23	trumpet	ode_played	580.73	93.40000000000001	541.49	31.39	7.85	0	0	7.85	0.35	5.065797019100886	7.533754705156832e-09
S23	trumpet	orchestral_excerpt_unplayed	0	61.9	0	0	0	0	0	7.85	0.35	5.065797019100886	0
S23	trumpet	orchestral_excerpt_unplayed	15.7	61.9	15.7	0	0	0	0	7.85	0.35	5.065797019100886	6.837455966675468e-11
S23	trumpet	orchestral_excerpt_unplayed	0	61.5	0	0	0	0	0	7.85	0.35	5.065797019100886	0
S23	trumpet	orchestral_excerpt_unplayed	23.54	61.7	0	23.54	0	0	0	7.85	0.35	5.065797019100886	6.760668131112217e-10
S23	trumpet	orchestral_excerpt_unplayed	0	62.3	0	0	0	0	0	7.85	0.35	5.065797019100886	0
S23	trumpet	orchestral_excerpt_played	1098.68	98.8	980.96	78.48	15.7	23.54	0	7.85	0.35	5.065797019100886	1.176356254813526e-07
S23	trumpet	orchestral_excerpt_played	1600.93	96.7	1475.37	109.87	15.7	0	0	7.85	0.35	5.065797019100886	1.812900702820497e-08
S23	trumpet	orchestral_excerpt_played	1632.32	98.7	1420.43	156.95	47.09	7.85	0	7.85	0.35	5.065797019100886	7.052274944565976e-08
S23	trumpet	orchestral_excerpt_played	1804.97	98.40000000000001	1687.26	109.87	7.85	0	0	7.85	0.35	5.065797019100886	1.477865360453399e-08
S23	trumpet	orchestral_excerpt_played	1349.81	97.2	1208.55	141.26	0	0	0	7.85	0.35	5.065797019100886	9.321241973007441e-09
S23	trumpet	piano	0	78.3	0	0	0	0	0	23.54	0.35	5.065797019100886	0
S23	trumpet	piano	47.09	81	47.09	0	0	0	0	23.54	0.35	5.065797019100886	2.05123679000264e-10
S23	trumpet	piano	23.54	80.09999999999999	23.54	0	0	0	0	23.54	0.35	5.065797019100886	1.02561839500132e-10
S23	trumpet	piano	0	79.3	0	0	0	0	0	23.54	0.35	5.065797019100886	0
S23	trumpet	piano	164.8	78.90000000000001	141.26	23.54	0	0	0	23.54	0.35	5.065797019100886	1.291437850112014e-09
S23	trumpet	forte	2024.71	99.3	1789.28	188.34	47.09	0	0	23.54	0.35	5.065797019100886	3.884369418193281e-08
S23	trumpet	forte	5744.52	100	5132.4	588.58	23.54	0	0	23.54	0.35	5.065797019100886	5.208038127632582e-08
S23	trumpet	forte	2778.09	100	2519.11	258.97	0	0	0	23.54	0.35	5.065797019100886	1.841085177073757e-08
S23	trumpet	forte	2424.94	98.8	2330.77	94.17	0	0	0	23.54	0.35	5.065797019100886	1.285788936295796e-08
S23	trumpet	forte	1224.24	96.90000000000001	1059.44	164.8	0	0	0	23.54	0.35	5.065797019100886	9.347750469284493e-09
