# Supplementary material for: Investigation of the Emission Rate of Particles when Musicians Play Wind, Woodwind, and Brass Instruments
Source: Hindawi journal article supplement (doi:10.1155/2023/8092828), 2023-12-21
Supplement: f8 [file 8092828.f8.zip › data_aggregated.csv]

ID	Instrument	Condition	PM	SPL	PM_0.3_0.5um	PM_0.5_1.0um	PM_1.0_3.0um	PM_3.0_5.0um	PM_5.0_10.0um	Accuracy.PM	RH	R.ev	PVR	shift.PM	log.PM	p	PM2p
S1	flute	Ode	180.49	84.6	125.56	23.54	31.39	0	0	7.85	0.35	5.06579701910089	1.83167032071339e-08	188.34	2.27494256608369	0.339648730492349	531.401956775652
S1	flute	Ode	361	86.2	180.5	117.72	62.78	0	0	7.85	0.35	5.06579701910089	3.83539213351011e-08	368.85	2.5668497877944	0.408347588933906	884.050768960044
S1	flute	Ode	109.87	87.7	62.78	47.09	0	0	0	7.85	0.35	5.06579701910089	1.62563186488946e-09	117.72	2.07085025342757	0.485322019016483	226.385772116118
S1	flute	Ode	125.57	87	62.78	47.09	15.7	0	0	7.85	0.35	5.06579701910089	1.02066391030672e-08	133.42	2.12522093631656	0.447744227713668	280.450293331982
S1	flute	Ode	47.09	88.2	15.7	23.54	7.85	0	0	7.85	0.35	5.06579701910089	5.01785135195014e-09	54.94	1.73988865508454	0.514079156553773	91.6006793889033
S1	flute	orchestral_excerpt	0	96.6	0	0	0	0	0	7.85	0.35	5.06579701910089	0	7.85	0.894869656745253	1.35216595078396	0
S1	flute	orchestral_excerpt	31.4	96.9	15.7	7.85	7.85	0	0	7.85	0.35	5.06579701910089	4.56714014320933e-09	39.25	1.59383966108127	1.39968399200455	22.4336351486243
S1	flute	orchestral_excerpt	15.7	97.9	15.7	0	0	0	0	7.85	0.35	5.06579701910089	6.83745596667547e-11	23.55	1.37199091146491	1.57047126922015	9.99699918598078
S1	flute	orchestral_excerpt	23.55	96.1	0	7.85	15.7	0	0	7.85	0.35	5.06579701910089	8.87473740221487e-09	31.4	1.49692964807321	1.2765269723811	18.4484938505235
S1	flute	orchestral_excerpt	39.24	96.9	23.54	7.85	7.85	0	0	7.85	0.35	5.06579701910089	4.6013274230427e-09	47.09	1.67292869044272	1.39968399200455	28.0348994659878
S2	flute	Ode	2283.68	87.9	1389.04	627.82	266.82	0	0	7.85	0.35	5.06579701910089	1.69375536171994e-07	2291.53	3.36012554726668	0.496626621059115	4598.38418474182
S2	flute	Ode	957.41	87.5	651.36	211.88	94.17	0	0	7.85	0.35	5.06579701910089	6.06537765029781e-08	965.26	2.98464430956811	0.474274741132331	2018.68224673779
S2	flute	Ode	1381.19	86.8	918.18	408.08	54.93	0	0	7.85	0.35	5.06579701910089	4.56322730219715e-08	1389.04	3.14271475223808	0.43755232478991	3156.62818307085
S2	flute	Ode	855.4	87.5	572.88	251.13	31.39	0	0	7.85	0.35	5.06579701910089	2.68006906843782e-08	863.25	2.93613658702149	0.474274741132331	1803.59594516405
S2	flute	Ode	463.01	87.3	329.6	109.87	23.54	0	0	7.85	0.35	5.06579701910089	1.74794487113708e-08	470.86	2.67289179828488	0.463478929993696	998.988238810118
S2	flute	orchestral_excerpt	627.81	97	463.01	125.56	39.24	0	0	7.85	0.35	5.06579701910089	2.69897890759566e-08	635.66	2.80322488356222	1.41589156876827	443.402597944806
S2	flute	orchestral_excerpt	894.63	96.5	635.66	235.43	23.54	0	0	7.85	0.35	5.06579701910089	2.23500677351323e-08	902.48	2.95543758621661	1.33668783513723	669.288652505881
S2	flute	orchestral_excerpt	533.64	97	313.91	188.34	31.39	0	0	7.85	0.35	5.06579701910089	2.38696656149135e-08	541.49	2.73359044067524	1.41589156876827	376.893267656244
S2	flute	orchestral_excerpt	721.99	97	502.25	204.04	15.7	0	0	7.85	0.35	5.06579701910089	1.66282388611445e-08	729.84	2.86322766185574	1.41589156876827	509.918990921092
S2	flute	orchestral_excerpt	321.76	97.8	180.5	109.87	31.39	0	0	7.85	0.35	5.06579701910089	2.1034925814042e-08	329.61	2.51800037923545	1.55249423325738	207.253587876392
S3	flute	Ode	258.97	85.7	125.56	109.87	23.54	0	0	7.85	0.35	5.06579701910089	1.65222048760362e-08	266.82	2.42621837983258	0.385504982638187	671.768230407165
S3	flute	Ode	0	86.7	0	0	0	0	0	7.85	0.35	5.06579701910089	0	7.85	0.894869656745253	0.432543704745404	0
S3	flute	Ode	266.82	86.1	172.65	86.32	7.85	0	0	7.85	0.35	5.06579701910089	7.50444178358095e-09	274.67	2.43881122750957	0.403673272736312	660.980099552671
S3	flute	Ode	298.21	85.9	188.34	78.48	31.39	0	0	7.85	0.35	5.06579701910089	2.01676906763938e-08	306.06	2.48580657391483	0.394484547222971	755.948495572998
S3	flute	Ode	141.26	86.8	86.32	39.24	15.7	0	0	7.85	0.35	5.06579701910089	1.00496580583635e-08	149.11	2.1735067702081	0.43755232478991	322.841388324986
S3	flute	orchestral_excerpt	502.25	95.8	313.91	125.56	62.78	0	0	7.85	0.35	5.06579701910089	3.91604606966389e-08	510.1	2.70765532353119	1.23319000372296	407.277060699261
S3	flute	orchestral_excerpt	368.84	95.8	282.52	62.78	23.54	0	0	7.85	0.35	5.06579701910089	1.58538168464813e-08	376.69	2.5759840911285	1.23319000372296	299.094218154934
S3	flute	orchestral_excerpt	227.58	96.1	141.26	62.78	23.54	0	0	7.85	0.35	5.06579701910089	1.52726330893139e-08	235.43	2.3718618026209	1.2765269723811	178.280604267606
S3	flute	orchestral_excerpt	486.56	96.8	337.45	117.72	31.39	0	0	7.85	0.35	5.06579701910089	2.194402701508e-08	494.41	2.69408724626542	1.38366194183787	351.646587427069
S3	flute	orchestral_excerpt	831.86	94	517.95	219.74	94.17	0	0	7.85	0.35	5.06579701910089	5.98472371414403e-08	839.71	2.92412932517458	1.00237446725455	829.889454665006
S4	flute	Ode	31.39	83.3	31.39	0	0	0	0	7.85	0.35	5.06579701910089	1.36749119333509e-10	39.24	1.59372899870791	0.292435434891344	107.33993304082
S4	flute	Ode	0	82.5	0	0	0	0	0	7.85	0.35	5.06579701910089	6.83745596667547e-11	7.85	0.894869656745253	0.266704286432665	0
S4	flute	Ode	70.63	82.5	62.78	7.85	0	0	0	7.85	0.35	5.06579701910089	5.67228402704181e-10	78.48	1.89475899437189	0.266704286432665	264.825140025757
S4	flute	Ode	0	79.8	0	0	0	0	0	7.85	0.35	5.06579701910089	1.36749119333509e-10	7.85	0.894869656745253	0.195447444191162	0
S4	flute	Ode	31.39	81.3	31.39	0	0	0	0	7.85	0.35	5.06579701910089	6.35602962370935e-10	39.24	1.59372899870791	0.232289722768068	135.132969405373
S4	flute	orchestral_excerpt	0	87.9	0	0	0	0	0	7.85	0.35	5.06579701910089	3.96292003537294e-10	7.85	0.894869656745253	0.496626621059115	0
S4	flute	orchestral_excerpt	7.85	90.4	7.85	0	0	0	0	7.85	0.35	5.06579701910089	1.36749119333509e-10	15.7	1.19589965240923	0.662262242965183	11.8533105025779
S4	flute	orchestral_excerpt	0	91.3	0	0	0	0	0	7.85	0.35	5.06579701910089	3.07685518500396e-10	7.85	0.894869656745253	0.734564600996168	0
S4	flute	orchestral_excerpt	0	89.2	0	0	0	0	0	7.85	0.35	5.06579701910089	6.83745596667547e-11	7.85	0.894869656745253	0.576806300625321	0
S4	flute	orchestral_excerpt	0	93.2	0	0	0	0	0	7.85	0.35	5.06579701910089	1.02561839500132e-10	7.85	0.894869656745253	0.91417637922975	0
S5	flute	Ode	1467.52	82.2	1067.29	258.97	125.56	7.85	7.85	7.85	0.35	5.06579701910089	3.44277058851274e-07	1475.37	3.16890094831924	0.257649910338627	5695.79084297468
S5	flute	Ode	1875.61	83.4	1287.03	408.08	156.95	15.7	7.85	7.85	0.35	5.06579701910089	4.0139839460225e-07	1883.46	3.27495640130396	0.295821677633641	6340.33994737477
S5	flute	Ode	2299.38	82.2	1365.5	674.9	251.13	7.85	0	7.85	0.35	5.06579701910089	1.96333942393416e-07	2307.23	3.36309089003559	0.257649910338627	8924.4354751684
S5	flute	Ode	1192.85	83.3	784.77	329.6	78.48	0	0	7.85	0.35	5.06579701910089	5.57886995577834e-08	1200.7	3.07943451063374	0.292435434891344	4079.02004229826
S5	flute	Ode	1859.91	82	1137.92	533.64	172.65	15.7	0	7.85	0.35	5.06579701910089	1.8756597346865e-07	1867.76	3.27132107030307	0.251785082358833	7386.8951352302
S5	flute	orchestral_excerpt	745.54	92.5	353.15	313.91	78.48	0	0	7.85	0.35	5.06579701910089	7.40698132724345e-08	753.39	2.87701985136812	0.843393006857164	883.976976259495
S5	flute	orchestral_excerpt	188.35	97	180.5	0	0	7.85	0	7.85	0.35	5.06579701910089	1.24736764198149e-07	196.2	2.29269900304393	1.41589156876827	133.025723264848
S5	flute	orchestral_excerpt	1961.91	95.1	1114.37	667.05	180.49	0	0	7.85	0.35	5.06579701910089	1.32047900952203e-07	1969.76	3.29441331396603	1.13770586168768	1724.44395873085
S5	flute	orchestral_excerpt	1875.61	95.9	1224.25	486.56	164.8	0	0	7.85	0.35	5.06579701910089	1.28490353916574e-07	1883.46	3.27495640130396	1.24746967096484	1503.53154361607
S5	flute	orchestral_excerpt	1718.65	94.8	1130.07	470.86	117.72	0	0	7.85	0.35	5.06579701910089	8.38913113011288e-08	1726.5	3.23716658268547	1.09908174771525	1563.71444032502
S6	oboe	Ode	690.59	91.3	494.4	141.26	54.93	0	0	7.85	0.35	5.06579701910089	3.65545486457459e-08	698.44	2.8441291036669	0.734564600996168	940.135148172764
S6	oboe	Ode	612.12	91.7	510.1	70.63	31.39	0	0	7.85	0.35	5.06579701910089	2.17061182688958e-08	619.97	2.7923706747407	0.769183564090707	795.804835902363
S6	oboe	Ode	1051.58	90.2	824.01	180.49	39.23	0	7.85	7.85	0.35	5.06579701910089	2.64698152395377e-07	1059.43	3.02507226674002	0.647187313859256	1624.84643546132
S6	oboe	Ode	1137.91	91.3	957.42	172.65	7.84	0	0	7.85	0.35	5.06579701910089	2.2830091865449e-08	1145.76	3.05909365638234	0.734564600996168	1549.09452273747
S6	oboe	Ode	926.03	90.7	816.16	70.63	39.24	0	0	7.85	0.35	5.06579701910089	2.96829053992371e-08	933.88	2.97029107463909	0.685535573092901	1350.81246888775
S6	oboe	orchestral_excerpt	996.65	93.5	745.53	196.19	54.93	0	0	7.85	0.35	5.06579701910089	4.3499440810179e-08	1004.5	3.00194994108427	0.946302517922961	1053.2044257766
S6	oboe	orchestral_excerpt	878.94	90.1	667.06	149.1	62.78	0	0	7.85	0.35	5.06579701910089	4.20649772698266e-08	886.79	2.94782078709321	0.63977902193828	1373.81809946996
S6	oboe	orchestral_excerpt	816.16	90.7	588.57	149.11	70.63	7.85	0	7.85	0.35	5.06579701910089	7.96988957954681e-08	824.01	2.91593248222924	0.685535573092901	1190.5436158736
S6	oboe	orchestral_excerpt	455.16	NA	415.93	15.69	23.54	0	0	7.85	0.35	5.06579701910089	1.56361400256673e-08	463.01	2.66559037092707	NA	NA
S6	oboe	orchestral_excerpt	431.61	89.3	360.99	47.08	23.54	0	0	7.85	0.35	5.06579701910089	1.61412704396116e-08	439.46	2.64291935137828	0.583485402800233	739.710021756567
S7	oboe	Ode	1028.05	89.8	690.6	164.8	172.65	0	0	7.85	0.35	5.06579701910089	1.02015510743107e-07	1035.9	3.01531783306912	0.618059086502718	1663.35229503252
S7	oboe	Ode	941.73	88.5	674.9	149.11	109.87	0	7.85	7.85	0.35	5.06579701910089	2.93511752724007e-07	949.58	2.97753155895716	0.532145011959762	1769.68679370278
S7	oboe	Ode	1726.49	89.6	1177.15	337.45	204.04	0	7.85	7.85	0.35	5.06579701910089	3.52300586403262e-07	1734.34	3.23913424057344	0.603990344080403	2858.4728496424
S7	oboe	Ode	988.8	90.5	776.92	180.49	23.54	7.85	0	7.85	0.35	5.06579701910089	7.29625994556434e-08	996.65	2.99854267109451	0.669930878315656	1475.97316679304
S7	oboe	Ode	761.23	91.4	510.1	149.11	86.32	7.85	7.85	7.85	0.35	5.06579701910089	3.22605127862212e-07	769.08	2.88597151763169	0.743070458194346	1024.43851939664
S7	oboe	orchestral_excerpt	345.31	93.3	266.83	47.09	31.39	0	0	7.85	0.35	5.06579701910089	1.98474520160796e-08	353.16	2.54797150814724	0.924762042798521	373.404166714089
S7	oboe	orchestral_excerpt	478.72	90.9	368.85	62.78	47.09	0	0	7.85	0.35	5.06579701910089	2.92894178209986e-08	486.57	2.68714532852389	0.701503747905136	682.419732509736
S7	oboe	orchestral_excerpt	353.15	91	313.91	23.54	15.7	0	0	7.85	0.35	5.06579701910089	1.06929398042908e-08	361	2.55750720190566	0.709626778467151	497.655966088021
S7	oboe	orchestral_excerpt	667.05	90.2	502.25	102.02	54.93	7.85	0	7.85	0.35	5.06579701910089	6.92187584537339e-08	674.9	2.82923942814139	0.647187313859256	1030.6907841291
S7	oboe	orchestral_excerpt	502.25	92.6	408.08	62.78	31.39	0	0	7.85	0.35	5.06579701910089	2.06742233029875e-08	510.1	2.70765532353119	0.853159037603185	588.694461247215
S8	oboe	Ode	376.69	94.4	251.13	70.62	47.09	7.85	0	7.85	0.35	5.06579701910089	6.34006443111529e-08	384.54	2.58494152196771	1.04961492049955	358.883998924787
S8	oboe	Ode	525.8	95.6	384.54	70.63	70.63	0	0	7.85	0.35	5.06579701910089	4.23894225680891e-08	533.65	2.7272565137623	1.20511917214871	436.305397965335
S8	oboe	Ode	408.08	94.6	282.52	70.63	54.93	0	0	7.85	0.35	5.06579701910089	3.31728123675404e-08	415.93	2.61902024607923	1.0740635927405	379.940259364692
S8	oboe	Ode	580.73	94.4	360.99	133.41	78.48	7.85	0	7.85	0.35	5.06579701910089	8.23592270515646e-08	588.58	2.76980550064975	1.04961492049955	553.279101371397
S8	oboe	Ode	549.34	93.4	455.17	86.32	7.85	0	0	7.85	0.35	5.06579701910089	8.73518385758253e-09	557.19	2.74600331345223	0.935470282574396	587.234047123578
S8	oboe	orchestral_excerpt	31.39	97.3	31.39	0	0	0	0	7.85	0.35	5.06579701910089	1.48079665261099e-08	39.24	1.59372899870791	1.46564906627781	21.4171323287632
S8	oboe	orchestral_excerpt	392.38	94.5	321.75	47.09	23.54	0	0	7.85	0.35	5.06579701910089	2.41550492750851e-08	400.23	2.60230963888826	1.06176888846198	369.553114867004
S8	oboe	orchestral_excerpt	510.09	95.1	360.99	94.17	54.93	0	0	7.85	0.35	5.06579701910089	3.41907519789854e-08	517.94	2.71427945245148	1.13770586168768	448.349628122095
S8	oboe	orchestral_excerpt	384.55	94.4	321.76	47.09	15.7	0	0	7.85	0.35	5.06579701910089	1.13006320577352e-08	392.4	2.59372899870791	1.04961492049955	366.372459546383
S8	oboe	orchestral_excerpt	321.76	93.6	227.58	78.48	15.7	0	0	7.85	0.35	5.06579701910089	1.18601816768831e-08	329.61	2.51800037923545	0.957260184645276	336.125961531798
S9	oboe	Ode	674.9	92.5	572.88	86.32	15.7	0	0	7.85	0.35	5.06579701910089	1.35214030342554e-08	682.75	2.83426170881177	0.843393006857164	800.220056975526
S9	oboe	Ode	455.17	92.4	360.99	78.48	15.7	0	0	7.85	0.35	5.06579701910089	1.23729908743838e-08	463.02	2.6655997506336	0.833738766940671	545.938389875051
S9	oboe	Ode	659.21	91.5	510.1	133.41	15.7	0	0	7.85	0.35	5.06579701910089	1.46000384218108e-08	667.06	2.82416489912941	0.751674808576889	876.988283334986
S9	oboe	Ode	337.45	91.8	290.36	47.09	0	0	0	7.85	0.35	5.06579701910089	2.65125025989078e-09	345.3	2.53819657834945	0.778090289988561	433.690028447677
S9	oboe	Ode	258.98	91.4	204.04	39.24	15.7	0	0	7.85	0.35	5.06579701910089	1.06308418155309e-08	266.83	2.42623465621155	0.743070458194346	348.526841760496
S9	oboe	orchestral_excerpt	745.53	95.9	612.12	86.32	47.09	0	0	7.85	0.35	5.06579701910089	3.07859793501109e-08	753.38	2.87701408679248	1.24746967096484	597.633768060573
S9	oboe	orchestral_excerpt	863.24	95.3	784.77	54.93	23.54	0	0	7.85	0.35	5.06579701910089	1.78164471514471e-08	871.09	2.94006302812375	1.16420643554174	741.483618064959
S9	oboe	orchestral_excerpt	588.58	94.8	572.88	15.7	0	0	0	7.85	0.35	5.06579701910089	2.94638263657736e-09	596.43	2.77555948003042	1.09908174771525	535.519765680332
S9	oboe	orchestral_excerpt	549.34	94.9	470.86	62.78	15.7	0	0	7.85	0.35	5.06579701910089	1.24350888631436e-08	557.19	2.74600331345223	1.11180851454081	494.095874258424
S9	oboe	orchestral_excerpt	1106.53	94.9	980.96	117.72	7.85	0	0	7.85	0.35	5.06579701910089	1.19613413037338e-08	1114.38	3.04703330911621	1.11180851454081	995.252316858729
S10	oboe	Ode	102.03	86.7	70.63	15.7	15.7	0	0	7.85	0.35	5.06579701910089	9.30521668558554e-09	109.88	2.04091865074852	0.432543704745404	235.883678066833
S10	oboe	Ode	102.02	88.7	62.78	0	39.24	0	0	7.85	0.35	5.06579701910089	2.16747354143612e-08	109.87	2.04087912451579	0.544540261615583	187.350701484073
S10	oboe	Ode	156.96	89.2	133.41	7.85	15.7	0	0	7.85	0.35	5.06579701910089	9.35335931988215e-09	164.81	2.21698355938209	0.576806300625321	272.119080235147
S10	oboe	Ode	117.72	92.9	102.02	7.85	7.85	0	0	7.85	0.35	5.06579701910089	4.94320022137648e-09	125.57	2.09888589425232	0.883140894706626	133.296963944927
S10	oboe	Ode	94.18	90.4	78.48	7.85	7.85	0	0	7.85	0.35	5.06579701910089	4.84063838187635e-09	102.03	2.00872788665238	0.662262242965183	142.209526513731
S10	oboe	orchestral_excerpt	102.02	87	78.48	23.54	0	0	0	7.85	0.35	5.06579701910089	1.01793961144500e-09	109.87	2.04087912451579	0.447744227713668	227.853300356206
S10	oboe	orchestral_excerpt	227.59	86.9	164.8	47.09	15.7	0	0	7.85	0.35	5.06579701910089	1.13271405540123e-08	235.44	2.37188024909155	0.442618941921128	514.189471901442
S10	oboe	orchestral_excerpt	219.74	89	180.5	15.7	23.54	0	0	7.85	0.35	5.06579701910089	1.4057248582425e-08	227.59	2.35715317582396	0.563676586252891	389.833470750929
S10	oboe	orchestral_excerpt	196.19	88.5	188.34	7.85	0	0	0	7.85	0.35	5.06579701910089	1.27120592474187e-09	204.04	2.30971531485915	0.532145011959762	368.677701736749
S10	oboe	orchestral_excerpt	227.58	91.2	196.19	31.39	0	0	0	7.85	0.35	5.06579701910089	1.75610441331606e-09	235.43	2.3718618026209	0.726156109540203	313.40368415285
S11	oboe	Ode	219.74	93.2	196.19	7.85	15.7	0	0	7.85	0.35	5.06579701910089	9.66104483838255e-09	227.59	2.35715317582396	0.91417637922975	240.369369623337
S11	oboe	Ode	188.35	95	164.8	7.85	15.7	0	0	7.85	0.35	5.06579701910089	9.49010843921566e-09	196.2	2.29269900304393	1.1246826503807	167.469463440416
S11	oboe	Ode	149.11	94.5	125.56	7.85	15.7	0	0	7.85	0.35	5.06579701910089	9.35335931988215e-09	156.96	2.19578899003587	1.06176888846198	140.435457866912
S11	oboe	Ode	149.1	92.6	133.41	15.69	0	0	0	7.85	0.35	5.06579701910089	1.29143785011201e-09	156.95	2.19576132003606	0.853159037603185	174.7622581821
S11	oboe	Ode	274.67	92.6	258.97	7.85	7.85	0	0	7.85	0.35	5.06579701910089	5.85230142241443e-09	282.52	2.45104919757913	0.853159037603185	321.944664351962
S11	oboe	orchestral_excerpt	86.32	91.9	86.32	0	0	0	0	7.85	0.35	5.06579701910089	3.76060078167151e-10	94.17	1.9739125704197	0.787100150911556	109.668381971508
S11	oboe	orchestral_excerpt	117.71	93	117.71	0	0	0	0	7.85	0.35	5.06579701910089	5.46996477334037e-10	125.56	2.098851307028	0.893367184301927	131.75993261044
S11	oboe	orchestral_excerpt	141.26	93.3	141.26	0	0	0	0	7.85	0.35	5.06579701910089	6.15371037000792e-10	149.11	2.1735067702081	0.924762042798521	152.752809330839
S11	oboe	orchestral_excerpt	109.87	93	70.63	23.54	15.7	0	0	7.85	0.35	5.06579701910089	9.56475956978933e-09	117.72	2.07085025342757	0.893367184301927	122.984145747252
S11	oboe	orchestral_excerpt	188.34	93.9	164.8	23.54	0	0	0	7.85	0.35	5.06579701910089	1.39399968961215e-09	196.19	2.29267686718512	0.990900381609581	190.069560467892
S12	clarinette	Ode	784.76	77.9	463.01	258.97	62.78	0	0	7.85	0.35	5.06579701910089	4.37094388474368e-08	792.61	2.89905954732876	0.157047126922015	4996.97138929317
S12	clarinette	Ode	659.21	77.7	361	227.58	70.63	0	0	7.85	0.35	5.06579701910089	5.0944589030299e-08	667.06	2.82416489912941	0.153472297872364	4295.3028601177
S12	clarinette	Ode	439.47	76.5	321.76	94.17	23.54	0	0	7.85	0.35	5.06579701910089	1.69261756631299e-08	447.32	2.65061831622644	0.133668783513723	3287.7534189191
S12	clarinette	Ode	973.11	77.9	565.03	274.67	133.41	0	0	7.85	0.35	5.06579701910089	8.29968999468942e-08	980.96	2.99165129878316	0.157047126922015	6196.29291584061
S12	clarinette	Ode	1028.05	75.2	612.12	282.52	133.41	0	0	7.85	0.35	5.06579701910089	8.34273792302649e-08	1035.9	3.01531783306912	0.115087987467431	8932.73070997897
S12	clarinette	orchestral_excerpt	86.32	87.1	78.47	7.85	0	0	0	7.85	0.35	5.06579701910089	8.60958566741343e-10	94.17	1.9739125704197	0.452928861518612	190.58180507769
S12	clarinette	orchestral_excerpt	156.96	84	117.72	31.39	7.85	0	0	7.85	0.35	5.06579701910089	5.68764159415446e-09	164.81	2.21698355938209	0.316978638492223	495.175323948055
S12	clarinette	orchestral_excerpt	109.86	86.1	62.78	23.54	23.54	0	0	7.85	0.35	5.06579701910089	1.38039822691281e-08	117.71	2.07081335970272	0.403673272736312	272.150789809071
S12	clarinette	orchestral_excerpt	376.69	85.5	251.12	78.48	47.09	0	0	7.85	0.35	5.06579701910089	2.90221961532385e-08	384.54	2.58494152196771	0.37672981789796	999.894306486854
S12	clarinette	orchestral_excerpt	180.5	86.6	149.11	15.69	15.7	0	0	7.85	0.35	5.06579701910089	9.97500692778985e-09	188.35	2.27496562453929	0.427592417900446	422.130965011696
S13	clarinette	Ode	4072.96	88	2864.41	973.12	235.43	0	0	7.85	0.35	5.06579701910089	1.6940338010889e-07	4080.81	3.61074637476041	0.502377286301916	8107.37290688785
S13	clarinette	Ode	2644.67	86	1781.43	635.66	227.58	0	0	7.85	0.35	5.06579701910089	1.49977393152006e-07	2652.52	3.42365866716599	0.399052462993776	6627.37420578519
S13	clarinette	Ode	3037.07	87	1946.23	831.86	251.13	7.85	0	7.85	0.35	5.06579701910089	2.03302538628827e-07	3044.92	3.48357588678336	0.447744227713668	6783.04668606963
S13	clarinette	Ode	2519.11	85.7	1757.88	557.19	204.04	0	0	7.85	0.35	5.06579701910089	1.34801045331285e-07	2526.96	3.40259836739804	0.385504982638187	6534.57183033167
S13	clarinette	Ode	2864.41	87	2126.73	604.27	133.41	0	0	7.85	0.35	5.06579701910089	9.94904596216638e-08	2872.26	3.45822375014355	0.447744227713668	6397.42474096571
S13	clarinette	orchestral_excerpt	2479.87	92.7	1640.17	572.88	266.82	0	0	7.85	0.35	5.06579701910089	1.69288331899606e-07	2487.72	3.39580149768356	0.86303815365553	2873.41873530867
S13	clarinette	orchestral_excerpt	3405.92	91.6	2244.45	847.56	306.06	7.85	0	7.85	0.35	5.06579701910089	2.35744864978053e-07	3413.77	3.53323425752397	0.760378792641123	4479.24117947816
S13	clarinette	orchestral_excerpt	1922.7	95.5	1428.29	384.54	109.87	0	0	7.85	0.35	5.06579701910089	7.74201666961055e-08	1930.55	3.28568105405274	1.19132428705802	1613.91824282212
S13	clarinette	orchestral_excerpt	3280.34	92.8	2267.98	753.38	251.13	7.85	0	7.85	0.35	5.06579701910089	2.02655784737292e-07	3288.19	3.51695690423526	0.873031664480331	3757.41239804012
S13	clarinette	orchestral_excerpt	3437.3	94.1	2134.58	941.72	345.3	7.85	7.85	7.85	0.35	5.06579701910089	4.84413389769525e-07	3445.15	3.53720813560623	1.01398141654941	3389.90433542379
S14	clarinette	Ode	1993.32	82.7	1577.39	376.69	39.24	0	0	7.85	0.35	5.06579701910089	4.0415574561928e-08	2001.17	3.30128398365165	0.272916627317785	7303.76899198221
S14	clarinette	Ode	2220.9	87	1710.8	423.78	86.32	0	0	7.85	0.35	5.06579701910089	6.66295394105721e-08	2228.75	3.34806135618341	0.447744227713668	4960.19794904037
S14	clarinette	Ode	2307.22	88.5	1773.58	423.77	109.87	0	0	7.85	0.35	5.06579701910089	7.9948623191126e-08	2315.07	3.36456412717001	0.532145011959762	4335.69787961192
S14	clarinette	Ode	1569.54	86.6	1106.53	376.69	86.32	0	0	7.85	0.35	5.06579701910089	6.26449852371796e-08	1577.39	3.19793908325139	0.427592417900446	3670.64506827954
S14	clarinette	Ode	1593.08	88.1	1224.24	282.52	86.32	0	0	7.85	0.35	5.06579701910089	6.04535271822354e-08	1600.93	3.20437234298841	0.50819454110986	3134.78377103545
S14	clarinette	orchestral_excerpt	1812.82	89.8	1239.94	502.25	70.63	0	0	7.85	0.35	5.06579701910089	5.86471434296331e-08	1820.67	3.26023123620321	0.618059086502718	2933.08526577584
S14	clarinette	orchestral_excerpt	2456.33	90.9	1750.04	604.27	102.02	0	0	7.85	0.35	5.06579701910089	8.07900175528064e-08	2464.18	3.39167242839155	0.701503747905136	3501.52085050894
S14	clarinette	orchestral_excerpt	2456.33	88.7	1702.95	643.51	109.87	0	0	7.85	0.35	5.06579701910089	8.575972627046e-08	2464.18	3.39167242839155	0.544540261615583	4510.8326659123
S14	clarinette	orchestral_excerpt	1750.04	90.6	1224.24	463.02	62.78	0	0	7.85	0.35	5.06579701910089	7.85085508001759e-08	1757.89	3.24499169560257	0.677688312278404	2582.36709751762
S14	clarinette	orchestral_excerpt	2087.49	89.2	1585.24	431.62	70.63	0	0	7.85	0.35	5.06579701910089	6.23965932821402e-08	2095.34	3.32125450374297	0.576806300625321	3619.04853975578
S15	clarinette	Ode	337.44	88.5	251.12	54.93	31.39	0	0	7.85	0.35	5.06579701910089	2.00246649861534e-08	345.29	2.53818400085827	0.532145011959762	634.112868515463
S15	clarinette	Ode	502.26	86.5	384.54	70.63	47.09	0	0	7.85	0.35	5.06579701910089	2.93438370262021e-08	510.11	2.70766383735642	0.42269780796733	1188.22475662997
S15	clarinette	Ode	549.34	86.6	368.84	141.26	39.24	0	0	7.85	0.35	5.06579701910089	2.70302529266969e-08	557.19	2.74600331345223	0.427592417900446	1284.72811257355
S15	clarinette	Ode	408.08	88.3	290.37	86.32	31.39	0	0	7.85	0.35	5.06579701910089	2.09742300379316e-08	415.93	2.61902024607923	0.520031912633054	784.721072085339
S15	clarinette	Ode	219.74	89.7	149.11	70.63	0	0	0	7.85	0.35	5.06579701910089	3.00567620003837e-09	227.59	2.35715317582396	0.610984222643103	359.649221463379
S15	clarinette	orchestral_excerpt	180.49	94.8	117.71	23.54	39.24	0	0	7.85	0.35	5.06579701910089	2.28496560705099e-08	188.34	2.27494256608369	1.09908174771525	164.218903985258
S15	clarinette	orchestral_excerpt	266.82	94.3	188.34	47.09	31.39	0	0	7.85	0.35	5.06579701910089	1.92662682589122e-08	274.67	2.43881122750957	1.03760007785792	257.151098668803
S15	clarinette	orchestral_excerpt	86.32	94.2	86.32	0	0	0	0	7.85	0.35	5.06579701910089	8.60958566741343e-10	94.17	1.9739125704197	1.02572276798273	84.1552929255572
S15	clarinette	orchestral_excerpt	86.33	93.7	39.24	39.24	7.85	0	0	7.85	0.35	5.06579701910089	5.7078735195246e-09	94.18	1.9739586861067	0.9683447351682	89.1521344255614
S15	clarinette	orchestral_excerpt	243.28	94.4	188.34	39.24	15.7	0	0	7.85	0.35	5.06579701910089	1.05282799760308e-08	251.13	2.39989859664846	1.04961492049955	231.780241733049
S16	clarinette	Ode	2668.21	85.5	1828.51	651.36	188.34	0	0	7.85	0.35	5.06579701910089	1.33505400843225e-07	2676.06	3.42749584653106	0.37672981789796	7082.55591470782
S16	clarinette	Ode	2307.23	85.8	1781.43	415.93	109.87	0	0	7.85	0.35	5.06579701910089	7.95320992622186e-08	2315.08	3.36456600311131	0.389968919951609	5916.44585493198
S16	clarinette	Ode	1459.67	85.5	1130.07	243.28	86.32	0	0	7.85	0.35	5.06579701910089	5.89165018023828e-08	1467.52	3.16658402871383	0.37672981789796	3874.58048355323
S16	clarinette	Ode	2558.34	85.2	1961.92	502.25	94.17	0	0	7.85	0.35	5.06579701910089	7.44214347872833e-08	2566.19	3.40928880827303	0.363940171721997	7029.56199612458
S16	clarinette	Ode	1695.1	86.9	1302.72	306.06	86.32	0	0	7.85	0.35	5.06579701910089	6.14714667936803e-08	1702.95	3.23120189690983	0.442618941921128	3829.70505654965
S16	clarinette	orchestral_excerpt	2220.9	94.3	1671.56	439.47	109.87	0	0	7.85	0.35	5.06579701910089	7.99548997620329e-08	2228.75	3.34806135618341	1.03760007785792	2140.42003985288
S16	clarinette	orchestral_excerpt	2472.02	94.4	1742.19	565.03	164.8	0	0	7.85	0.35	5.06579701910089	1.13556789200295e-07	2479.87	3.39442891479297	1.04961492049955	2355.16850200975
S16	clarinette	orchestral_excerpt	1436.14	93.9	1004.51	306.06	117.72	7.85	0	7.85	0.35	5.06579701910089	1.11453269910078e-07	1443.99	3.15956418564369	0.990900381609581	1449.32833476882
S16	clarinette	orchestral_excerpt	1287.03	93.5	933.88	243.28	109.87	0	0	7.85	0.35	5.06579701910089	8.56558289903413e-08	1294.88	3.11222952304848	0.946302517922961	1360.06189947048
S16	clarinette	orchestral_excerpt	3037.06	93.4	2142.42	745.53	141.26	0	7.85	7.85	0.35	5.06579701910089	3.33018893805207e-07	3044.91	3.48357446048909	0.935470282574396	3246.55957177182
S17	clarinette	Ode	2220.9	85.1	1522.46	565.03	133.41	0	0	7.85	0.35	5.06579701910089	9.56084672877715e-08	2228.75	3.34806135618341	0.359774183025757	6173.0388248592
S17	clarinette	Ode	2063.94	85.6	1318.41	588.58	156.95	0	0	7.85	0.35	5.06579701910089	1.08181707482898e-07	2071.79	3.31634573250986	0.381092143592649	5415.85554753959
S17	clarinette	Ode	2111.03	84.7	1483.22	541.49	86.32	0	0	7.85	0.35	5.06579701910089	6.90184423609602e-08	2118.88	3.32610636170676	0.343581677431518	6144.18677905421
S17	clarinette	Ode	1726.49	85.9	1232.09	400.23	94.17	0	0	7.85	0.35	5.06579701910089	6.8141458506797e-08	1734.34	3.23913424057344	0.394484547222971	4376.57193964597
S17	clarinette	Ode	2118.87	87.1	1593.08	455.16	70.63	0	0	7.85	0.35	5.06579701910089	5.86966882765791e-08	2126.72	3.3277103152626	0.452928861518612	4678.15186891757
S17	clarinette	orchestral_excerpt	1177.15	94.9	847.55	204.04	125.56	0	0	7.85	0.35	5.06579701910089	7.92377013778722e-08	1185	3.07371835034612	1.11180851454081	1058.77044887193
S17	clarinette	orchestral_excerpt	1569.54	94.1	1232.09	298.21	39.24	0	0	7.85	0.35	5.06579701910089	3.61589243625179e-08	1577.39	3.19793908325139	1.01398141654941	1547.89819062085
S17	clarinette	orchestral_excerpt	1263.48	91.1	1012.35	204.04	47.09	0	0	7.85	0.35	5.06579701910089	3.62035948512064e-08	1271.33	3.10425829530377	0.71784386929001	1760.10418707017
S17	clarinette	orchestral_excerpt	1192.85	91.9	910.33	219.74	62.78	0	0	7.85	0.35	5.06579701910089	4.44629612164205e-08	1200.7	3.07943451063374	0.787100150911556	1515.49964590724
S17	clarinette	orchestral_excerpt	816.16	91.2	643.51	133.41	39.24	0	0	7.85	0.35	5.06579701910089	2.82268077208651e-08	824.01	2.91593248222924	0.726156109540203	1123.94564925824
S18	trumpet	Ode	2213.06	89.6	1546	525.8	141.26	0	0	7.85	0.35	5.06579701910089	9.8789286524925e-08	2220.91	3.34653095958615	0.603990344080403	3664.06519854132
S18	trumpet	Ode	1836.37	91.5	1279.18	447.32	109.87	0	0	7.85	0.35	5.06579701910089	7.8245535770364e-08	1844.22	3.26581272750229	0.751674808576889	2443.03783903137
S18	trumpet	Ode	1396.89	91.9	1075.14	258.97	62.78	0	0	7.85	0.35	5.06579701910089	4.63076721147735e-08	1404.74	3.1475959491419	0.787100150911556	1774.72968132738
S18	trumpet	Ode	1993.31	93.4	1522.45	392.38	78.48	0	0	7.85	0.35	5.06579701910089	6.1084923506658e-08	2001.16	3.30128181344339	0.935470282574396	2130.81060631285
S18	trumpet	Ode	2322.92	94.6	1702.95	494.41	125.56	0	0	7.85	0.35	5.06579701910089	8.99906024659332e-08	2330.77	3.36749941952696	1.0740635927405	2162.73972574846
S18	trumpet	orchestral_excerpt	3649.18	98.9	2715.3	698.45	235.43	0	0	7.85	0.35	5.06579701910089	1.60156121546146e-07	3657.03	3.56312852303452	1.76209774601603	2070.92938416755
S18	trumpet	orchestral_excerpt	3084.15	98	2220.9	721.99	141.26	0	0	7.85	0.35	5.06579701910089	1.07329095420022e-07	3092	3.49023948524629	1.58865646944856	1941.35740439249
S18	trumpet	orchestral_excerpt	3335.27	97.7	2307.22	863.25	164.8	0	0	7.85	0.35	5.06579701910089	1.24581786314373e-07	3343.12	3.52415196570489	1.53472297872364	2173.2065305843
S18	trumpet	orchestral_excerpt	3970.94	96.5	2809.48	926.03	235.43	0	0	7.85	0.35	5.06579701910089	1.67033306871222e-07	3978.79	3.59975101774705	1.33668783513723	2970.73100810581
S18	trumpet	orchestral_excerpt	3037.06	98	2111.03	721.99	204.04	0	0	7.85	0.35	5.06579701910089	1.41071940615566e-07	3044.91	3.48357446048909	1.58865646944856	1911.7160055718
S19	trumpet	Ode	627.8	91	494.4	78.47	54.93	0	0	7.85	0.35	5.06579701910089	3.45807674116158e-08	635.65	2.80321805132646	0.709626778467151	884.690402123912
S19	trumpet	Ode	910.33	91.9	729.84	125.56	54.93	0	0	7.85	0.35	5.06579701910089	3.66989765486358e-08	918.18	2.96292782863449	0.787100150911556	1156.56184152135
S19	trumpet	Ode	816.17	93	627.82	117.72	70.63	0	0	7.85	0.35	5.06579701910089	4.46785681042759e-08	824.02	2.91593775269739	0.893367184301927	913.58851583266
S19	trumpet	Ode	525.8	92.9	368.84	109.87	47.09	0	0	7.85	0.35	5.06579701910089	3.04706150480542e-08	533.65	2.7272565137623	0.883140894706626	595.374988466215
S19	trumpet	Ode	1153.6	92.6	839.7	251.12	62.78	0	0	7.85	0.35	5.06579701910089	4.55074093241425e-08	1161.45	3.06500051831921	0.853159037603185	1352.15118067653
S19	trumpet	orchestral_excerpt	1357.66	97.3	1122.22	219.74	15.7	0	0	7.85	0.35	5.06579701910089	1.98481197363888e-08	1365.51	3.13529488494365	1.46564906627781	926.319970610659
S19	trumpet	orchestral_excerpt	1239.94	98.1	965.27	219.74	54.93	0	0	7.85	0.35	5.06579701910089	4.0428862196082e-08	1247.79	3.0961415007989	1.60705224437123	771.561723859907
S19	trumpet	orchestral_excerpt	2032.56	98.3	1546	415.93	70.63	0	0	7.85	0.35	5.06579701910089	5.71736182511898e-08	2040.41	3.3097174433311	1.64448529989414	1235.98550873689
S19	trumpet	orchestral_excerpt	2118.88	98.1	1663.71	313.91	141.26	0	0	7.85	0.35	5.06579701910089	9.31833071245913e-08	2126.73	3.32771235734365	1.60705224437123	1318.48856029508
S19	trumpet	orchestral_excerpt	1961.92	98.1	1569.54	306.06	86.32	0	0	7.85	0.35	5.06579701910089	6.26338343080152e-08	1969.77	3.29441551876956	1.60705224437123	1220.81905356326
S20	trumpet	Ode	2605.44	92	1239.94	682.75	682.75	0	0	7.85	0.35	5.06579701910089	4.53856905889702e-07	2613.29	3.41718760659351	0.796214341106994	3272.28469205616
S20	trumpet	Ode	1891.3	90.3	957.42	439.47	478.71	15.7	0	7.85	0.35	5.06579701910089	4.17943569056924e-07	1899.15	3.2785592678437	0.654681389757676	2888.88615071225
S20	trumpet	Ode	2056.1	90.2	1192.85	510.1	353.15	0	0	7.85	0.35	5.06579701910089	3.51429745575944e-07	2063.95	3.31469917212808	0.647187313859256	3176.9782193956
S20	trumpet	Ode	2126.73	91.6	926.03	729.83	463.02	7.85	0	7.85	0.35	5.06579701910089	3.85539569853449e-07	2134.58	3.32931243597645	0.760378792641123	2796.93492320183
S20	trumpet	Ode	2040.4	91.4	1122.22	517.95	400.23	0	0	7.85	0.35	5.06579701910089	3.03668045715758e-07	2048.25	3.31138296353143	0.743070458194346	2745.90380696624
S20	trumpet	orchestral_excerpt	10366.81	96.2	6427.27	2919.34	1020.2	0	0	7.85	0.35	5.06579701910089	7.02457389981661e-07	10374.66	4.01597387284983	1.29130845806931	8028.14380655404
S20	trumpet	orchestral_excerpt	5964.26	96.7	3790.45	1467.52	698.44	7.85	0	7.85	0.35	5.06579701910089	5.01438521582485e-07	5972.11	3.77612779837533	1.36782329456286	4360.40241726261
S20	trumpet	orchestral_excerpt	17618.1	96.9	9809.63	5344.29	2464.18	0	0	7.85	0.35	5.06579701910089	1.69244936756709e-06	17625.95	4.24615253381317	1.39968399200455	12587.1983252222
S20	trumpet	orchestral_excerpt	22742.65	96.6	12964.4	6497.9	3272.5	7.85	0	7.85	0.35	5.06579701910089	2.24508440905255e-06	22750.5	4.35699094582191	1.35216595078396	16819.4221920868
S20	trumpet	orchestral_excerpt	13105.67	96	7455.32	3625.64	2016.86	7.85	0	7.85	0.35	5.06579701910089	1.30364057230754e-06	13113.52	4.11771928294751	1.26191468896039	10385.5435828209
S21	trumpet	Ode	2495.57	92.7	1891.3	439.47	149.1	15.7	0	7.85	0.35	5.06579701910089	1.80854115692143e-07	2503.42	3.39853371751896	0.86303815365553	2891.61028331092
S21	trumpet	Ode	5815.15	92.3	3727.66	1420.43	619.97	47.09	0	7.85	0.35	5.06579701910089	6.0002488790543e-07	5823	3.76514679010803	0.824195038194661	7055.55084720925
S21	trumpet	Ode	2150.27	94.2	1428.28	439.47	243.28	39.24	0	7.85	0.35	5.06579701910089	3.22650399299179e-07	2158.12	3.33407558950764	1.02572276798273	2096.34617376087
S21	trumpet	Ode	7910.48	93.5	4331.93	2244.44	1271.33	54.93	7.85	7.85	0.35	5.06579701910089	1.24045299754707e-06	7918.33	3.89863359721318	0.946302517922961	8359.3563899235
S21	trumpet	Ode	7588.73	91.8	4002.33	2079.64	1491.06	15.7	0	7.85	0.35	5.06579701910089	9.62078531005689e-07	7596.58	3.88061811577842	0.778090289988561	9753.01979428578
S21	trumpet	orchestral_excerpt	8075.29	96.2	5414.91	1679.41	926.03	39.24	15.7	7.85	0.35	5.06579701910089	1.19825834899319e-06	8083.14	3.90758010084494	1.29130845806931	6253.57167726888
S21	trumpet	orchestral_excerpt	9103.33	96.9	6003.49	1954.08	1122.22	23.54	0	7.85	0.35	5.06579701910089	7.9606303020185e-07	9111.18	3.95957462662196	1.39968399200455	6503.84661966643
S21	trumpet	orchestral_excerpt	9872.42	95.9	7180.65	1781.43	871.1	39.24	0	7.85	0.35	5.06579701910089	7.29102034429769e-07	9880.27	3.99476881279693	1.24746967096484	7913.95592997809
S21	trumpet	orchestral_excerpt	25661.99	95.6	16134.88	6340.94	3021.37	133.41	31.39	7.85	0.35	5.06579701910089	3.38064168430258e-06	25669.84	4.40942316172428	1.20511917214871	21294.1513113968
S21	trumpet	orchestral_excerpt	15153.92	96.7	10123.54	3233.25	1718.65	62.78	15.7	7.85	0.35	5.06579701910089	1.79727364379104e-06	15161.77	4.18074990422227	1.36782329456286	11078.8579637716
S22	trumpet	Ode	1498.9	96.4	1185	243.27	70.63	0	0	7.85	0.35	5.06579701910089	5.54698631101186e-08	1506.75	3.17804120013995	1.32138689601519	1134.33847764052
S22	trumpet	Ode	2456.34	97.5	2142.42	258.98	47.09	0	7.85	7.85	0.35	5.06579701910089	2.834069409681e-07	2464.19	3.391674190818	1.49978841866491	1637.79101734003
S22	trumpet	Ode	2346.46	96.3	1977.62	329.6	39.24	0	0	7.85	0.35	5.06579701910089	3.96725354017994e-08	2354.31	3.37186364730322	1.30626110529494	1796.31774266921
S22	trumpet	Ode	1883.45	94.4	1443.98	400.23	39.24	0	0	7.85	0.35	5.06579701910089	3.95127499317969e-08	1891.3	3.27676042255778	1.04961492049955	1794.41999462394
S22	trumpet	Ode	1718.65	95.6	1373.35	266.82	78.48	0	0	7.85	0.35	5.06579701910089	5.65499007103234e-08	1726.5	3.23716658268547	1.20511917214871	1426.12451923378
S22	trumpet	orchestral_excerpt	1310.57	94.2	1075.14	180.5	54.93	0	0	7.85	0.35	5.06579701910089	4.02251407297311e-08	1318.42	3.1200537825082	1.02572276798273	1277.70391855245
S22	trumpet	orchestral_excerpt	1632.32	95.7	1185	345.3	102.02	0	0	7.85	0.35	5.06579701910089	7.11450647738767e-08	1640.17	3.21488886404503	1.21907379448034	1338.98374929454
S22	trumpet	orchestral_excerpt	1577.39	94.5	1373.35	180.5	23.54	0	0	7.85	0.35	5.06579701910089	2.4088744648377e-08	1585.24	3.20009502225419	1.06176888846198	1485.62461863516
S22	trumpet	orchestral_excerpt	1702.95	94.8	1483.21	172.65	47.09	0	0	7.85	0.35	5.06579701910089	3.73534092237274e-08	1710.8	3.23319924158477	1.09908174771525	1549.42978858493
S22	trumpet	orchestral_excerpt	1247.78	92.9	1012.35	196.19	39.24	0	0	7.85	0.35	5.06579701910089	3.17048292676638e-08	1255.63	3.09886168348453	0.883140894706626	1412.88893706423
S23	trumpet	Ode	1271.32	93.9	1185	86.32	0	0	0	7.85	0.35	5.06579701910089	8.20841930561864e-09	1279.17	3.10692826547611	0.990900381609581	1282.99476273782
S23	trumpet	Ode	863.24	94.9	745.53	86.32	31.39	0	0	7.85	0.35	5.06579701910089	2.29229049884341e-08	871.09	2.94006302812375	1.11180851454081	776.428664387887
S23	trumpet	Ode	855.4	95	745.53	94.17	15.7	0	0	7.85	0.35	5.06579701910089	1.44988787949601e-08	863.25	2.93613658702149	1.1246826503807	760.570103673647
S23	trumpet	Ode	674.89	94.6	549.33	102.02	23.54	0	0	7.85	0.35	5.06579701910089	1.8211336942335e-08	682.74	2.8342553478061	1.0740635927405	628.351993831202
S23	trumpet	Ode	580.73	93.4	541.49	31.39	7.85	0	0	7.85	0.35	5.06579701910089	7.53375470515683e-09	588.58	2.76980550064975	0.935470282574396	620.789362118316
S23	trumpet	orchestral_excerpt	1098.68	98.8	980.96	78.48	15.7	23.54	0	7.85	0.35	5.06579701910089	1.17635625481353e-07	1106.53	3.04396319292016	1.74192717991216	630.726710433098
S23	trumpet	orchestral_excerpt	1585.24	96.7	1459.67	109.87	15.7	0	0	7.85	0.35	5.06579701910089	1.8129007028205e-08	1593.09	3.20224031151945	1.36782329456286	1158.95087201788
S23	trumpet	orchestral_excerpt	1632.32	98.7	1420.43	156.95	47.09	7.85	0	7.85	0.35	5.06579701910089	7.05227494456598e-08	1640.17	3.21488886404503	1.7219875043692	947.927900671933
S23	trumpet	orchestral_excerpt	1781.44	98.4	1687.26	86.33	7.85	0	0	7.85	0.35	5.06579701910089	1.4778653604534e-08	1789.29	3.25268073475008	1.66352754220534	1070.88097720242
S23	trumpet	orchestral_excerpt	1349.81	97.2	1208.55	141.26	0	0	0	7.85	0.35	5.06579701910089	9.32124197300744e-09	1357.66	3.13279102280779	1.44887192014998	931.628242101809
S1	flute	breathing	0	62.2	0	0	0	0	0	7.85	0.35	5.06579701910089	0	7.85	0.894869656745253	0.0257649910338627	0
S1	flute	breathing	0	62.2	0	0	0	0	0	7.85	0.35	5.06579701910089	0	7.85	0.894869656745253	0.0257649910338627	0
S1	flute	breathing	0	62.2	0	0	0	0	0	7.85	0.35	5.06579701910089	0	7.85	0.894869656745253	0.0257649910338627	0
S1	flute	breathing	0	62.2	0	0	0	0	0	7.85	0.35	5.06579701910089	0	7.85	0.894869656745253	0.0257649910338627	0
S1	flute	breathing	NA	62.2	NA	NA	NA	NA	NA	7.85	0.35	5.06579701910089	NA	NA	NA	0.0257649910338627	NA
S1	flute	speaking	109.87	74.1	62.78	39.24	7.85	0	0	7.85	0.35	5.06579701910089	5.67368623969122e-09	117.72	2.07085025342757	0.101398141654941	1083.5504300847
S1	flute	speaking	149.11	74.8	94.17	23.54	31.39	0	0	7.85	0.35	5.06579701910089	1.81799540878004e-08	156.96	2.19578899003587	0.109908174771525	1356.67797513667
S1	flute	speaking	78.48	75.7	31.39	7.85	39.24	0	0	7.85	0.35	5.06579701910089	2.17291546195647e-08	86.33	1.93616174091116	0.121907379448034	643.767427003499
S1	flute	speaking	102.02	75.3	78.48	23.54	0	0	0	7.85	0.35	5.06579701910089	1.01793961144500e-09	109.87	2.04087912451579	0.116420643554174	876.305068289086
S1	flute	speaking	23.54	76.6	7.85	0	15.7	0	0	7.85	0.35	5.06579701910089	8.58100723817771e-09	31.39	1.49679131570004	0.135216595078396	174.091057287398
S1	flute	piano	70.63	80	70.63	0	0	0	0	23.54	0.35	5.06579701910089	3.07685518500396e-10	94.17	1.9739125704197	0.2	353.15
S1	flute	piano	70.63	83.2	70.63	0	0	0	0	23.54	0.35	5.06579701910089	3.07685518500396e-10	94.17	1.9739125704197	0.289087954149186	244.320107380022
S1	flute	piano	23.54	79	23.54	0	0	0	0	23.54	0.35	5.06579701910089	1.02561839500132e-10	47.08	1.6728364541714	0.178250187626749	132.061572071341
S1	flute	piano	0	79.7	0	0	0	0	0	23.54	0.35	5.06579701910089	0	23.54	1.37180645850742	0.193210175797963	0
S1	flute	piano	0	78.9	0	0	0	0	0	23.54	0.35	5.06579701910089	0	23.54	1.37180645850742	0.176209774601603	0
S1	flute	forte	400.23	88.7	235.43	164.8	0	0	0	23.54	0.35	5.06579701910089	5.75808608677987e-09	423.77	2.62713020840209	0.544540261615583	734.986975641741
S1	flute	forte	776.92	90.7	517.95	235.43	23.54	0	0	23.54	0.35	5.06579701910089	2.18372585376316e-08	800.46	2.90333963455224	0.685535573092901	1133.30369785889
S1	flute	forte	894.64	86.1	659.21	164.8	70.63	0	0	23.54	0.35	5.06579701910089	4.60648890103317e-08	918.18	2.96292782863449	0.403673272736312	2216.24779350799
S1	flute	forte	565.03	90.1	400.23	141.26	23.54	0	0	23.54	0.35	5.06579701910089	1.86201820876861e-08	588.57	2.76979812190478	0.63977902193828	883.164312403024
S1	flute	forte	400.23	89.4	188.34	188.34	23.54	0	0	23.54	0.35	5.06579701910089	1.90492591584073e-08	423.77	2.62713020840209	0.590241845333278	678.077983057964
S2	flute	breathing	15.7	62.7	15.7	0	0	0	0	7.85	0.35	5.06579701910089	6.83745596667547e-11	23.55	1.37199091146491	0.0272916627317785	575.267258514039
S2	flute	breathing	0	62.7	0	0	0	0	0	7.85	0.35	5.06579701910089	0	7.85	0.894869656745253	0.0272916627317785	0
S2	flute	breathing	0	62.7	0	0	0	0	0	7.85	0.35	5.06579701910089	0	7.85	0.894869656745253	0.0272916627317785	0
S2	flute	breathing	0	62.7	0	0	0	0	0	7.85	0.35	5.06579701910089	0	7.85	0.894869656745253	0.0272916627317785	0
S2	flute	breathing	NA	62.7	NA	NA	NA	NA	NA	7.85	0.35	5.06579701910089	NA	NA	NA	0.0272916627317785	NA
S2	flute	speaking	86.32	65.9	62.78	15.7	0	0	7.85	7.85	0.35	5.06579701910089	2.26079813817815e-07	94.17	1.9739125704197	0.0394484547222971	2188.17189691362
S2	flute	speaking	188.34	63.9	164.8	15.7	7.85	0	0	7.85	0.35	5.06579701910089	5.4420540644139e-09	196.19	2.29267686718512	0.031335021402163	6010.5272494564
S2	flute	speaking	47.09	66.8	39.24	0	7.85	0	0	7.85	0.35	5.06579701910089	4.44434637833905e-09	54.94	1.73988865508454	0.043755232478991	1076.21414244822
S2	flute	speaking	47.09	66.4	31.39	15.7	0	0	0	7.85	0.35	5.06579701910089	5.87460328074324e-10	54.94	1.73988865508454	0.0417859226170808	1126.93455237365
S2	flute	speaking	54.93	65.1	39.24	15.7	0	0	0	7.85	0.35	5.06579701910089	6.21647607907701e-10	62.78	1.79782131136402	0.0359774183025758	1526.79104259316
S2	flute	piano	306.06	81.7	211.89	94.17	0	0	0	23.54	0.35	5.06579701910089	3.62732380794608e-09	329.6	2.51798720302508	0.243237200129274	1258.277927214
S2	flute	piano	94.17	82.7	94.17	0	0	0	0	23.54	0.35	5.06579701910089	4.10247358000528e-10	117.71	2.07081335970272	0.272916627317785	345.050431428453
S2	flute	piano	94.17	82.9	70.63	23.54	0	0	0	23.54	0.35	5.06579701910089	9.83752331611618e-10	117.71	2.07081335970272	0.279273672211188	337.196124698745
S2	flute	piano	517.95	81.8	400.23	47.09	70.63	0	0	23.54	0.35	5.06579701910089	4.15563747102742e-08	541.49	2.73359044067524	0.246053754162476	2105.02782923598
S2	flute	piano	70.63	80	70.63	0	0	0	0	23.54	0.35	5.06579701910089	3.07685518500396e-10	94.17	1.9739125704197	0.2	353.15
S2	flute	forte	447.32	94.4	423.78	23.54	0	0	0	23.54	0.35	5.06579701910089	2.5221799241136e-09	470.86	2.67289179828488	1.04961492049955	426.175344179659
S2	flute	forte	2189.51	95.1	1695.1	376.69	117.72	0	0	23.54	0.35	5.06579701910089	8.23026711413715e-08	2213.05	3.34499122616349	1.13770586168768	1924.49566599935
S2	flute	forte	894.64	93.4	753.38	117.72	23.54	0	0	23.54	0.35	5.06579701910089	1.94825428670768e-08	918.18	2.96292782863449	0.935470282574396	956.353201876139
S2	flute	forte	965.27	94.2	706.29	235.43	23.54	0	0	23.54	0.35	5.06579701910089	2.26577532536327e-08	988.81	2.99511284985928	1.02572276798273	941.063248404224
S2	flute	forte	1742.19	91.8	1389.04	306.06	47.09	0	0	23.54	0.35	5.06579701910089	4.04804769759867e-08	1765.73	3.24692429580168	0.778090289988561	2239.05891439104
S3	flute	breathing	23.54	61.6	7.85	0	15.7	0	0	7.85	0.35	5.06579701910089	8.58100723817771e-09	31.39	1.49679131570004	0.0240452886923483	978.985958587843
S3	flute	breathing	15.7	61.6	7.85	7.85	0	0	0	7.85	0.35	5.06579701910089	2.59542884203785e-10	23.55	1.37199091146491	0.0240452886923483	652.934560315597
S3	flute	breathing	0	61.6	0	0	0	0	0	7.85	0.35	5.06579701910089	0	7.85	0.894869656745253	0.0240452886923483	0
S3	flute	breathing	7.85	61.6	7.85	0	0	0	0	7.85	0.35	5.06579701910089	3.41872798333773e-11	15.7	1.19589965240923	0.0240452886923483	326.467280157798
S3	flute	breathing	NA	61.6	NA	NA	NA	NA	NA	7.85	0.35	5.06579701910089	NA	NA	NA	0.0240452886923483	NA
S3	flute	speaking	31.39	72.1	31.39	0	0	0	0	7.85	0.35	5.06579701910089	1.36749119333509e-10	39.24	1.59372899870791	0.0805434068650917	389.72774087614
S3	flute	speaking	7.85	70.7	7.85	0	0	0	0	7.85	0.35	5.06579701910089	3.41872798333773e-11	15.7	1.19589965240923	0.0685535573092901	114.509010299546
S3	flute	speaking	7.85	69.7	7.85	0	0	0	0	7.85	0.35	5.06579701910089	3.41872798333773e-11	15.7	1.19589965240923	0.0610984222643103	128.481222739944
S3	flute	speaking	15.7	72.4	15.7	0	0	0	0	7.85	0.35	5.06579701910089	6.83745596667547e-11	23.55	1.37199091146491	0.0833738766940671	188.30838414303
S3	flute	speaking	7.85	71.7	0	7.85	0	0	0	7.85	0.35	5.06579701910089	2.25355604370407e-10	15.7	1.19589965240923	0.0769183564090707	102.056262854237
S3	flute	piano	517.95	81.1	494.41	23.54	0	0	0	23.54	0.35	5.06579701910089	2.82986544261399e-09	541.49	2.73359044067524	0.227002163134463	2281.69631887251
S3	flute	piano	729.84	81.3	565.03	141.26	23.54	0	0	23.54	0.35	5.06579701910089	1.9338114964187e-08	753.38	2.87701408679248	0.232289722768068	3141.93840047205
S3	flute	piano	235.43	82.6	188.34	47.09	0	0	0	23.54	0.35	5.06579701910089	2.1726283422235e-09	258.97	2.4132494567875	0.269792576518331	872.633350547375
S3	flute	piano	235.43	81.2	235.43	0	0	0	0	23.54	0.35	5.06579701910089	1.02561839500132e-09	258.97	2.4132494567875	0.229630724299377	1025.2547899168
S3	flute	piano	47.09	82.6	47.09	0	0	0	0	23.54	0.35	5.06579701910089	2.05123679000264e-10	70.63	1.84898920625117	0.269792576518331	174.541496314301
S3	flute	forte	2401.4	88	1577.39	729.84	94.17	0	0	23.54	0.35	5.06579701910089	7.91106342030227e-08	2424.94	3.38470099737487	0.502377286301916	4780.07279683584
S3	flute	forte	1883.45	87.8	1318.41	447.32	117.72	0	0	23.54	0.35	5.06579701910089	8.26898821487031e-08	1906.99	3.28034841566991	0.490941783137006	3836.40192115078
S3	flute	forte	729.84	90.1	423.78	282.52	23.54	0	0	23.54	0.35	5.06579701910089	2.27791448058535e-08	753.38	2.87701408679248	0.63977902193828	1140.76888265087
S3	flute	forte	2001.16	89.9	1389.04	470.86	141.26	0	0	23.54	0.35	5.06579701910089	9.64938644178312e-08	2024.7	3.30636068286105	0.625215873424791	3200.75046885502
S3	flute	forte	1389.04	88.9	894.64	353.15	141.26	0	0	23.54	0.35	5.06579701910089	9.09597317227723e-08	1412.58	3.15001305300454	0.557224233725955	2492.78462049649
S4	flute	breathing	15.7	63.1	15.7	0	0	0	0	7.85	0.35	5.06579701910089	6.83745596667547e-11	23.55	1.37199091146491	0.0285778791702221	549.375966861784
S4	flute	breathing	7.85	63.1	7.85	0	0	0	0	7.85	0.35	5.06579701910089	3.41872798333773e-11	15.7	1.19589965240923	0.0285778791702221	274.687983430892
S4	flute	breathing	15.7	63.1	7.85	0	7.85	0	0	7.85	0.35	5.06579701910089	4.30759725900554e-09	23.55	1.37199091146491	0.0285778791702221	549.375966861784
S4	flute	breathing	7.85	63.1	7.85	0	0	0	0	7.85	0.35	5.06579701910089	3.41872798333773e-11	15.7	1.19589965240923	0.0285778791702221	274.687983430892
S4	flute	breathing	0	63.1	0	0	0	0	0	7.85	0.35	5.06579701910089	0	7.85	0.894869656745253	0.0285778791702221	0
S4	flute	speaking	70.63	67.4	54.93	7.85	7.85	0	0	7.85	0.35	5.06579701910089	4.73807654237621e-09	78.48	1.89475899437189	0.0468845763063985	1506.46557064782
S4	flute	speaking	94.17	68.5	62.78	23.54	7.85	0	0	7.85	0.35	5.06579701910089	5.22297503095041e-09	102.02	2.00868531919517	0.0532145011959762	1769.63041809214
S4	flute	speaking	62.78	69.4	47.09	7.85	7.85	0	0	7.85	0.35	5.06579701910089	4.70388926254284e-09	70.63	1.84898920625117	0.0590241845333278	1063.63180612096
S4	flute	speaking	39.24	69.6	7.85	31.39	0	0	0	7.85	0.35	5.06579701910089	9.35609697315006e-10	47.09	1.67292869044272	0.0603990344080403	649.679260348844
S4	flute	speaking	133.41	68	86.32	15.7	31.39	0	0	7.85	0.35	5.06579701910089	1.79204112035966e-08	141.26	2.15001920191515	0.0502377286301916	2655.5738811771
S4	flute	piano	0	75.5	0	0	0	0	0	23.54	0.35	5.06579701910089	0	23.54	1.37180645850742	0.119132428705802	0
S4	flute	piano	23.54	71.2	23.54	0	0	0	0	23.54	0.35	5.06579701910089	1.02561839500132e-10	47.08	1.6728364541714	0.0726156109540203	324.172718382902
S4	flute	piano	23.54	71.1	23.54	0	0	0	0	23.54	0.35	5.06579701910089	1.02561839500132e-10	47.08	1.6728364541714	0.071784386929001	327.926461547724
S4	flute	piano	23.54	73.6	0	23.54	0	0	0	23.54	0.35	5.06579701910089	6.76066813111222e-10	47.08	1.6728364541714	0.0957260184645276	245.910154601521
S4	flute	piano	0	78.9	0	0	0	0	0	23.54	0.35	5.06579701910089	0	23.54	1.37180645850742	0.176209774601603	0
S4	flute	forte	47.09	84.4	47.09	0	0	0	0	23.54	0.35	5.06579701910089	2.05123679000264e-10	70.63	1.84898920625117	0.331917381487513	141.872654541207
S4	flute	forte	94.17	84.7	94.17	0	0	0	0	23.54	0.35	5.06579701910089	4.10247358000528e-10	117.71	2.07081335970272	0.343581677431518	274.083300087415
S4	flute	forte	0	83.3	0	0	0	0	0	23.54	0.35	5.06579701910089	0	23.54	1.37180645850742	0.292435434891344	0
S4	flute	forte	117.72	86	117.72	0	0	0	0	23.54	0.35	5.06579701910089	5.1280919750066e-10	141.26	2.15001920191515	0.399052462993776	294.998805713013
S4	flute	forte	70.63	84.9	47.09	23.54	0	0	0	23.54	0.35	5.06579701910089	8.81190492111486e-10	94.17	1.9739125704197	0.351584722791739	200.890412527503
S5	flute	breathing	109.87	62.6	70.63	31.39	7.85	0	0	7.85	0.35	5.06579701910089	5.48251791515419e-09	117.72	2.07085025342757	0.0269792576518331	4072.38781058659
S5	flute	breathing	78.48	62.6	39.24	39.24	0	0	0	7.85	0.35	5.06579701910089	1.29771442101892e-09	86.33	1.93616174091116	0.0269792576518331	2908.9013868648
S5	flute	breathing	368.84	62.6	149.11	141.26	78.48	0	0	7.85	0.35	5.06579701910089	4.74400589872232e-08	376.69	2.5759840911285	0.0269792576518331	13671.2434700715
S5	flute	breathing	62.78	62.6	47.09	7.85	7.85	0	0	7.85	0.35	5.06579701910089	4.70388926254284e-09	70.63	1.84898920625117	0.0269792576518331	2326.97284744358
S5	flute	breathing	15.7	62.6	0	0	15.7	0	0	7.85	0.35	5.06579701910089	8.54681995834433e-09	23.55	1.37199091146491	0.0269792576518331	581.92853942122
S5	flute	speaking	219.74	66.9	133.41	23.54	47.09	7.85	7.85	7.85	0.35	5.06579701910089	2.86440594649096e-07	227.59	2.35715317582396	0.0442618941921128	4964.54126084727
S5	flute	speaking	133.41	66.6	78.48	47.09	7.85	0	0	7.85	0.35	5.06579701910089	5.96741640372838e-09	141.26	2.15001920191515	0.0427592417900446	3120.02725995626
S5	flute	speaking	156.95	66.3	94.17	47.09	15.7	0	0	7.85	0.35	5.06579701910089	1.03092009425673e-08	164.8	2.2169572073611	0.0413076031162106	3799.54265461622
S5	flute	speaking	204.04	66	156.95	23.54	23.54	0	0	7.85	0.35	5.06579701910089	1.41800423472953e-08	211.89	2.32611046097083	0.0399052462993776	5113.11215746543
S5	flute	speaking	235.43	67.2	149.11	54.93	31.39	0	0	7.85	0.35	5.06579701910089	1.93206874641157e-08	243.28	2.38610640713608	0.0458173530553555	5138.44611921511
S5	flute	piano	941.72	73.4	588.58	258.97	94.17	0	0	23.54	0.35	5.06579701910089	6.12817006817927e-08	965.26	2.98464430956811	0.0935470282574397	10066.8082946302
S5	flute	piano	800.47	78.4	447.32	164.8	188.34	0	0	23.54	0.35	5.06579701910089	1.09242982142413e-07	824.01	2.91593248222924	0.166352754220534	4811.883059891
S5	flute	piano	612.12	76.8	353.15	164.8	94.17	0	0	23.54	0.35	5.06579701910089	5.75518150343465e-08	635.66	2.80322488356222	0.138366194183787	4423.91296234499
S5	flute	piano	1341.96	76.3	988.81	235.43	94.17	23.54	0	23.54	0.35	5.06579701910089	1.64911024640316e-07	1365.5	3.13529170447575	0.130626110529494	10273.2906503941
S5	flute	piano	517.95	75.7	447.32	70.63	0	0	0	23.54	0.35	5.06579701910089	3.97687538983617e-09	541.49	2.73359044067524	0.121907379448034	4248.71736514351
S5	flute	forte	4190.67	91.2	2377.85	1483.22	329.6	0	0	23.54	0.35	5.06579701910089	2.32434174140751e-07	4214.21	3.62471617331499	0.726156109540203	5771.03180010907
S5	flute	forte	3578.55	90.3	2613.29	800.47	141.26	23.54	0	23.54	0.35	5.06579701910089	2.13853854955527e-07	3602.09	3.55655455968148	0.654681389757676	5466.09397484869
S5	flute	forte	2848.72	91	1954.08	753.38	141.26	0	0	23.54	0.35	5.06579701910089	1.07068150323169e-07	2872.26	3.45822375014355	0.709626778467151	4014.39191197584
S5	flute	forte	5462	96	3272.49	1742.19	447.32	0	0	23.54	0.35	5.06579701910089	3.07869408673562e-07	5485.54	3.73921938623648	1.26191468896039	4328.3433086113
S5	flute	forte	4473.19	95.2	2989.98	1177.16	306.06	0	0	23.54	0.35	5.06579701910089	2.13491683459792e-07	4496.73	3.65289681173285	1.15087987467431	3886.75664457671
S6	oboe	breathing	23.54	62	7.85	7.85	7.85	0	0	7.85	0.35	5.06579701910089	4.53295286337595e-09	31.39	1.49679131570004	0.0251785082358834	934.924332270479
S6	oboe	breathing	23.54	62	15.7	7.85	0	0	0	7.85	0.35	5.06579701910089	2.93730164037162e-10	31.39	1.49679131570004	0.0251785082358834	934.924332270479
S6	oboe	breathing	0	62	0	0	0	0	0	7.85	0.35	5.06579701910089	0	7.85	0.894869656745253	0.0251785082358834	0
S6	oboe	breathing	23.54	62	15.7	0	7.85	0	0	7.85	0.35	5.06579701910089	4.34178453883892e-09	31.39	1.49679131570004	0.0251785082358834	934.924332270479
S6	oboe	breathing	NA	62	NA	NA	NA	NA	NA	7.85	0.35	5.06579701910089	NA	NA	NA	0.0251785082358834	NA
S6	oboe	speaking	258.97	69.5	149.11	78.48	31.39	0	0	7.85	0.35	5.06579701910089	1.99967542772269e-08	266.82	2.42621837983258	0.0597076523783592	4337.29998893513
S6	oboe	speaking	345.3	68.7	227.58	102.02	15.7	0	0	7.85	0.35	5.06579701910089	1.24678739303276e-08	353.15	2.54795921058719	0.0544540261615583	6341.12891809943
S6	oboe	speaking	235.43	68.5	156.95	39.24	39.24	0	0	7.85	0.35	5.06579701910089	2.31775735143804e-08	243.28	2.38610640713608	0.0532145011959762	4424.17000458142
S6	oboe	speaking	321.76	68.5	235.43	62.78	23.54	0	0	7.85	0.35	5.06579701910089	1.56486931674811e-08	329.61	2.51800037923545	0.0532145011959762	6046.47216019249
S6	oboe	speaking	172.65	69.3	109.87	47.09	15.7	0	0	7.85	0.35	5.06579701910089	1.03775755022341e-08	180.5	2.25647720624168	0.0583485402800233	2958.94291736223
S6	oboe	piano	117.72	68.5	94.17	23.54	0	0	0	23.54	0.35	5.06579701910089	1.08631417111175e-09	141.26	2.15001920191515	0.0532145011959762	2212.17896164178
S6	oboe	piano	164.8	72.3	141.26	23.54	0	0	0	23.54	0.35	5.06579701910089	1.29143785011201e-09	188.34	2.27494256608369	0.082419503819466	1999.52671834791
S6	oboe	piano	164.8	70.9	164.8	0	0	0	0	23.54	0.35	5.06579701910089	7.17932876500924e-10	188.34	2.27494256608369	0.0701503747905137	2349.23905242322
S6	oboe	piano	70.63	70.7	70.63	0	0	0	0	23.54	0.35	5.06579701910089	3.07685518500396e-10	94.17	1.9739125704197	0.0685535573092901	1030.28934999451
S6	oboe	piano	117.72	73	70.63	47.09	0	0	0	23.54	0.35	5.06579701910089	1.65981914472284e-09	141.26	2.15001920191515	0.0893367184301926	1317.71126216132
S6	oboe	forte	423.78	83.2	306.06	70.63	47.09	0	0	23.54	0.35	5.06579701910089	2.90019642278684e-08	447.32	2.65061831622644	0.289087954149186	1465.92064428013
S6	oboe	forte	353.15	84.6	306.06	47.09	0	0	0	23.54	0.35	5.06579701910089	2.68543753972416e-09	376.69	2.5759840911285	0.339648730492349	1039.75068444413
S6	oboe	forte	400.23	85.9	376.69	23.54	0	0	0	23.54	0.35	5.06579701910089	2.31705624511333e-09	423.77	2.62713020840209	0.394484547222971	1014.56445586392
S6	oboe	forte	306.06	85.3	211.89	70.63	23.54	0	0	23.54	0.35	5.06579701910089	1.57714869323513e-08	329.6	2.51798720302508	0.368154400293791	831.335982282871
S6	oboe	forte	659.21	84.8	541.49	70.63	47.09	0	0	23.54	0.35	5.06579701910089	3.00275826228697e-08	682.75	2.83426170881177	0.347560165749875	1896.67880546014
S7	oboe	breathing	125.56	63.3	39.24	39.24	47.09	0	0	7.85	0.35	5.06579701910089	2.69381742960519e-08	133.41	2.1251883841686	0.0292435434891344	4293.59732163281
S7	oboe	breathing	109.87	63.3	70.63	7.85	31.39	0	0	7.85	0.35	5.06579701910089	1.76266810395595e-08	117.72	2.07085025342757	0.0292435434891344	3757.06863434053
S7	oboe	breathing	149.11	63.3	78.48	23.54	39.24	0	7.85	7.85	0.35	5.06579701910089	2.47740593877713e-07	156.96	2.19578899003587	0.0292435434891344	5098.9032863067
S7	oboe	breathing	54.93	63.3	47.09	7.85	0	0	0	7.85	0.35	5.06579701910089	4.30479283370671e-10	62.78	1.79782131136402	0.0292435434891344	1878.36333925845
S7	oboe	breathing	39.24	63.3	23.54	15.7	0	0	0	7.85	0.35	5.06579701910089	5.53273048240946e-10	47.09	1.67292869044272	0.0292435434891344	1341.83465196616
S7	oboe	speaking	557.19	68.1	298.21	133.41	125.56	0	0	7.85	0.35	5.06579701910089	7.35047215747199e-08	565.04	2.75207919324311	0.0508194541109861	10964.1083271602
S7	oboe	speaking	439.47	67.1	235.43	141.26	62.78	0	0	7.85	0.35	5.06579701910089	3.9269299107046e-08	447.32	2.65061831622644	0.0452928861518612	9702.84822491802
S7	oboe	speaking	258.97	67.6	204.04	31.39	15.7	0	7.85	7.85	0.35	5.06579701910089	2.35692716021901e-07	266.82	2.42621837983258	0.0479766583803898	5397.83321186564
S7	oboe	speaking	376.69	69.2	172.65	156.95	47.09	0	0	7.85	0.35	5.06579701910089	3.08996921187754e-08	384.54	2.58494152196771	0.0576806300625321	6530.61520984821
S7	oboe	speaking	298.21	69.2	180.5	78.48	39.24	0	0	7.85	0.35	5.06579701910089	2.44069133757326e-08	306.06	2.48580657391483	0.0576806300625321	5170.01980867247
S7	oboe	piano	0	67.9	0	0	0	0	0	23.54	0.35	5.06579701910089	0	23.54	1.37180645850742	0.0496626621059115	0
S7	oboe	piano	0	67.3	0	0	0	0	0	23.54	0.35	5.06579701910089	0	23.54	1.37180645850742	0.0463478929993696	0
S7	oboe	piano	47.09	64.9	0	47.09	0	0	0	23.54	0.35	5.06579701910089	1.35213362622244e-09	70.63	1.84898920625117	0.0351584722791739	1339.36422567182
S7	oboe	piano	47.09	65.9	47.09	0	0	0	0	23.54	0.35	5.06579701910089	2.05123679000264e-10	70.63	1.84898920625117	0.0394484547222971	1193.70962263279
S7	oboe	piano	23.54	66.5	23.54	0	0	0	0	23.54	0.35	5.06579701910089	1.02561839500132e-10	47.08	1.6728364541714	0.042269780796733	556.899031797662
S7	oboe	forte	682.75	85.1	659.21	23.54	0	0	0	23.54	0.35	5.06579701910089	3.54779831911492e-09	706.29	2.84898305734056	0.359774183025757	1897.71815825684
S7	oboe	forte	70.63	85.3	47.09	23.54	0	0	0	23.54	0.35	5.06579701910089	8.81190492111486e-10	94.17	1.9739125704197	0.368154400293791	191.848854566553
S7	oboe	forte	353.15	83.7	258.97	94.17	0	0	0	23.54	0.35	5.06579701910089	3.83244748694634e-09	376.69	2.5759840911285	0.306217492336406	1153.26527333727
S7	oboe	forte	188.34	84	188.34	0	0	0	0	23.54	0.35	5.06579701910089	8.20494716001056e-10	211.88	2.32608996426356	0.316978638492223	594.172531296998
S7	oboe	forte	871.1	85.5	824.01	47.09	0	0	0	23.54	0.35	5.06579701910089	4.94179800872706e-09	894.64	2.95164831189043	0.37672981789796	2312.26719684807
S8	oboe	breathing	0	62.9	0	0	0	0	0	7.85	0.35	5.06579701910089	0	7.85	0.894869656745253	0.0279273672211188	0
S8	oboe	breathing	0	62.9	0	0	0	0	0	7.85	0.35	5.06579701910089	0	7.85	0.894869656745253	0.0279273672211188	0
S8	oboe	breathing	0	62.9	0	0	0	0	0	7.85	0.35	5.06579701910089	0	7.85	0.894869656745253	0.0279273672211188	0
S8	oboe	breathing	0	62.9	0	0	0	0	0	7.85	0.35	5.06579701910089	0	7.85	0.894869656745253	0.0279273672211188	0
S8	oboe	breathing	0	62.9	0	0	0	0	0	7.85	0.35	5.06579701910089	0	7.85	0.894869656745253	0.0279273672211188	0
S8	oboe	speaking	62.78	70.7	31.39	15.7	15.7	0	0	7.85	0.35	5.06579701910089	9.13428028641866e-09	70.63	1.84898920625117	0.0685535573092901	915.780339694966
S8	oboe	speaking	23.54	68.7	23.54	0	0	0	0	7.85	0.35	5.06579701910089	1.02561839500132e-10	31.39	1.49679131570004	0.0544540261615583	432.291267686246
S8	oboe	speaking	78.48	71.3	54.93	15.7	0	7.85	0	7.85	0.35	5.06579701910089	3.48773020009518e-08	86.33	1.93616174091116	0.0734564600996169	1068.38799328977
S8	oboe	speaking	47.09	69.6	39.24	0	7.85	0	0	7.85	0.35	5.06579701910089	4.44434637833905e-09	54.94	1.73988865508454	0.0603990344080403	779.648225530762
S8	oboe	speaking	39.24	69.7	23.54	7.85	7.85	0	0	7.85	0.35	5.06579701910089	4.6013274230427e-09	47.09	1.67292869044272	0.0610984222643103	642.24244335228
S8	oboe	piano	141.26	77	141.26	0	0	0	0	23.54	0.35	5.06579701910089	6.15371037000792e-10	164.8	2.2169572073611	0.141589156876828	997.675267767051
S8	oboe	piano	141.26	77.3	94.17	0	47.09	0	0	23.54	0.35	5.06579701910089	2.60507072330335e-08	164.8	2.2169572073611	0.146564906627781	963.805069372758
S8	oboe	piano	70.63	76.9	70.63	0	0	0	0	23.54	0.35	5.06579701910089	3.07685518500396e-10	94.17	1.9739125704197	0.139968399200455	504.613901448196
S8	oboe	piano	23.54	76.3	23.54	0	0	0	0	23.54	0.35	5.06579701910089	1.02561839500132e-10	47.08	1.6728364541714	0.130626110529494	180.208994239975
S8	oboe	piano	306.06	76.5	282.52	23.54	0	0	0	23.54	0.35	5.06579701910089	1.90680888711281e-09	329.6	2.51798720302508	0.133668783513723	2289.68942452131
S8	oboe	forte	659.21	92.1	588.58	23.54	47.09	0	0	23.54	0.35	5.06579701910089	2.88805726756475e-08	682.75	2.83426170881177	0.805434068650917	818.453087170947
S8	oboe	forte	329.6	92.8	306.06	0	23.54	0	0	23.54	0.35	5.06579701910089	1.41535338510182e-08	353.14	2.54794691267891	0.873031664480331	377.534989176129
S8	oboe	forte	470.86	92.9	400.23	70.63	0	0	0	23.54	0.35	5.06579701910089	3.77175171083591e-09	494.4	2.69407846208076	0.883140894706626	533.165209336633
S8	oboe	forte	565.03	92.7	353.15	164.8	47.09	0	0	23.54	0.35	5.06579701910089	3.19113551593135e-08	588.57	2.76979812190478	0.86303815365553	654.698749535845
S8	oboe	forte	494.41	91.3	494.41	0	0	0	0	23.54	0.35	5.06579701910089	2.15379862950277e-09	517.95	2.71428783740514	0.734564600996168	673.065376863401
S9	oboe	breathing	15.7	61.6	7.85	7.85	0	0	0	7.85	0.35	5.06579701910089	2.59542884203785e-10	23.55	1.37199091146491	0.0240452886923483	652.934560315597
S9	oboe	breathing	0	61.6	0	0	0	0	0	7.85	0.35	5.06579701910089	0	7.85	0.894869656745253	0.0240452886923483	0
S9	oboe	breathing	7.85	61.6	7.85	0	0	0	0	7.85	0.35	5.06579701910089	3.41872798333773e-11	15.7	1.19589965240923	0.0240452886923483	326.467280157798
S9	oboe	breathing	0	61.6	0	0	0	0	0	7.85	0.35	5.06579701910089	0	7.85	0.894869656745253	0.0240452886923483	0
S9	oboe	breathing	0	61.6	0	0	0	0	0	7.85	0.35	5.06579701910089	0	7.85	0.894869656745253	0.0240452886923483	0
S9	oboe	speaking	23.54	69.3	7.85	0	15.7	0	0	7.85	0.35	5.06579701910089	8.58100723817771e-09	31.39	1.49679131570004	0.0583485402800233	403.437684765172
S9	oboe	speaking	23.54	67.5	7.85	15.7	0	0	0	7.85	0.35	5.06579701910089	4.84898488574192e-10	31.39	1.49679131570004	0.0474274741132331	496.336784535441
S9	oboe	speaking	31.39	68	31.39	0	0	0	0	7.85	0.35	5.06579701910089	1.36749119333509e-10	39.24	1.59372899870791	0.0502377286301916	624.829204183714
S9	oboe	speaking	31.39	71.9	23.54	7.85	0	0	0	7.85	0.35	5.06579701910089	3.27917443870539e-10	39.24	1.59372899870791	0.0787100150911555	398.805666135963
S9	oboe	speaking	31.39	69.7	7.85	23.54	0	0	0	7.85	0.35	5.06579701910089	7.10254092944599e-10	39.24	1.59372899870791	0.0610984222643103	513.761220612336
S9	oboe	piano	0	70.5	0	0	0	0	0	23.54	0.35	5.06579701910089	0	23.54	1.37180645850742	0.0669930878315655	0
S9	oboe	piano	23.54	68	23.54	0	0	0	0	23.54	0.35	5.06579701910089	1.02561839500132e-10	47.08	1.6728364541714	0.0502377286301916	468.572139741466
S9	oboe	piano	0	73.1	0	0	0	0	0	23.54	0.35	5.06579701910089	0	23.54	1.37180645850742	0.0903711888749844	0
S9	oboe	piano	47.09	72.5	23.54	23.54	0	0	0	23.54	0.35	5.06579701910089	7.78628652611354e-10	70.63	1.84898920625117	0.0843393006857164	558.339938998037
S9	oboe	piano	47.09	75	47.09	0	0	0	0	23.54	0.35	5.06579701910089	2.05123679000264e-10	70.63	1.84898920625117	0.11246826503807	418.695887093664
S9	oboe	forte	2401.4	94.7	1718.65	494.41	188.34	0	0	23.54	0.35	5.06579701910089	1.24246256858977e-07	2424.94	3.38470099737487	1.08650066298487	2210.21494216377
S9	oboe	forte	3555.01	94.9	2895.8	541.49	117.72	0	0	23.54	0.35	5.06579701910089	9.22657926476568e-08	3578.55	3.55370708961546	1.11180851454081	3197.502045996
S9	oboe	forte	1341.96	90.5	965.27	353.15	23.54	0	0	23.54	0.35	5.06579701910089	2.71662675536902e-08	1365.5	3.13529170447575	0.669930878315656	2003.13202964157
S9	oboe	forte	1106.53	94.9	988.81	70.63	47.09	0	0	23.54	0.35	5.06579701910089	3.19762575733722e-08	1130.07	3.05310534584816	1.11180851454081	995.252316858729
S9	oboe	forte	1035.9	91.9	800.47	164.8	70.63	0	0	23.54	0.35	5.06579701910089	4.66802600473325e-08	1059.44	3.02507636604278	0.787100150911556	1316.09681283926
S10	oboe	breathing	0	62.6	0	0	0	0	0	7.85	0.35	5.06579701910089	0	7.85	0.894869656745253	0.0269792576518331	0
S10	oboe	breathing	7.85	62.6	7.85	0	0	0	0	7.85	0.35	5.06579701910089	3.41872798333773e-11	15.7	1.19589965240923	0.0269792576518331	290.96426971061
S10	oboe	breathing	15.7	62.6	7.85	0	7.85	0	0	7.85	0.35	5.06579701910089	4.30759725900554e-09	23.55	1.37199091146491	0.0269792576518331	581.92853942122
S10	oboe	breathing	7.85	62.6	7.85	0	0	0	0	7.85	0.35	5.06579701910089	3.41872798333773e-11	15.7	1.19589965240923	0.0269792576518331	290.96426971061
S10	oboe	breathing	7.85	62.6	7.85	0	0	0	0	7.85	0.35	5.06579701910089	3.41872798333773e-11	15.7	1.19589965240923	0.0269792576518331	290.96426971061
S10	oboe	speaking	47.09	64.1	31.39	7.85	7.85	0	0	7.85	0.35	5.06579701910089	4.63551470287608e-09	54.94	1.73988865508454	0.0320649078138008	1468.58367014336
S10	oboe	speaking	47.09	63.5	39.24	7.85	0	0	0	7.85	0.35	5.06579701910089	3.96292003537294e-10	54.94	1.73988865508454	0.0299247131218887	1573.6157539153
S10	oboe	speaking	39.24	64.9	39.24	0	0	0	0	7.85	0.35	5.06579701910089	1.70936399166887e-10	47.09	1.67292869044272	0.0351584722791739	1116.08945031562
S10	oboe	speaking	62.78	66.6	62.78	0	0	0	0	7.85	0.35	5.06579701910089	2.73498238667019e-10	70.63	1.84898920625117	0.0427592417900446	1468.22060850052
S10	oboe	speaking	23.54	65.6	23.54	0	0	0	0	7.85	0.35	5.06579701910089	1.02561839500132e-10	31.39	1.49679131570004	0.0381092143592649	617.698380713983
S10	oboe	piano	70.63	73.9	47.09	0	23.54	0	0	23.54	0.35	5.06579701910089	1.30253536165168e-08	94.17	1.9739125704197	0.0990900381609581	712.786081334143
S10	oboe	piano	141.26	72.2	70.63	23.54	23.54	23.54	0	23.54	0.35	5.06579701910089	1.1636582176926e-07	164.8	2.2169572073611	0.0814760555608226	1733.76090714834
S10	oboe	piano	47.09	75.5	47.09	0	0	0	0	23.54	0.35	5.06579701910089	2.05123679000264e-10	70.63	1.84898920625117	0.119132428705802	395.274406066957
S10	oboe	piano	47.09	74.2	0	23.54	23.54	0	0	23.54	0.35	5.06579701910089	1.34962967506277e-08	70.63	1.84898920625117	0.102572276798273	459.090911013032
S10	oboe	piano	47.09	74.2	47.09	0	0	0	0	23.54	0.35	5.06579701910089	2.05123679000264e-10	70.63	1.84898920625117	0.102572276798273	459.090911013032
S10	oboe	forte	1412.59	87.7	1035.9	282.52	94.17	0	0	23.54	0.35	5.06579701910089	6.39064424454065e-08	1436.13	3.15719375447957	0.485322019016483	2910.62417250849
S10	oboe	forte	988.81	87.5	729.84	211.89	47.09	0	0	23.54	0.35	5.06579701910089	3.49044782175381e-08	1012.35	3.00533068719707	0.474274741132331	2084.88859777608
S10	oboe	forte	847.55	86.4	776.92	47.09	23.54	0	0	23.54	0.35	5.06579701910089	1.75569042672433e-08	871.09	2.94006302812375	0.417859226170808	2028.31467374026
S10	oboe	forte	706.29	86.3	612.12	70.63	23.54	0	0	23.54	0.35	5.06579701910089	1.75150382038536e-08	729.83	2.86322171127126	0.413076031162105	1709.83050750487
S10	oboe	forte	776.92	84.6	659.21	117.72	0	0	0	23.54	0.35	5.06579701910089	6.25206557155981e-09	800.46	2.90333963455224	0.339648730492349	2287.42206359432
S11	oboe	breathing	0	62.5	0	0	0	0	0	7.85	0.35	5.06579701910089	0	7.85	0.894869656745253	0.0266704286432665	0
S11	oboe	breathing	0	62.5	0	0	0	0	0	7.85	0.35	5.06579701910089	0	7.85	0.894869656745253	0.0266704286432665	0
S11	oboe	breathing	7.85	62.5	0	0	7.85	0	0	7.85	0.35	5.06579701910089	4.27340997917217e-09	15.7	1.19589965240923	0.0266704286432665	294.333477162989
S11	oboe	breathing	0	62.5	0	0	0	0	0	7.85	0.35	5.06579701910089	0	7.85	0.894869656745253	0.0266704286432665	0
S11	oboe	breathing	15.7	62.5	15.7	0	0	0	0	7.85	0.35	5.06579701910089	6.83745596667547e-11	23.55	1.37199091146491	0.0266704286432665	588.666954325978
S11	oboe	speaking	47.09	67.9	39.24	0	7.85	0	0	7.85	0.35	5.06579701910089	4.44434637833905e-09	54.94	1.73988865508454	0.0496626621059115	948.197257319292
S11	oboe	speaking	62.78	68	47.09	15.7	0	0	0	7.85	0.35	5.06579701910089	6.55834887741078e-10	70.63	1.84898920625117	0.0502377286301916	1249.65840836743
S11	oboe	speaking	15.7	65.7	0	7.85	7.85	0	0	7.85	0.35	5.06579701910089	4.49876558354257e-09	23.55	1.37199091146491	0.0385504982638187	407.258030559234
S11	oboe	speaking	39.24	67.3	23.54	7.85	7.85	0	0	7.85	0.35	5.06579701910089	4.6013274230427e-09	47.09	1.67292869044272	0.0463478929993696	846.640428736076
S11	oboe	speaking	31.39	66.7	23.54	0	7.85	0	0	7.85	0.35	5.06579701910089	4.3759718186723e-09	39.24	1.59372899870791	0.0432543704745404	725.707013086139
S11	oboe	piano	0	74.3	0	0	0	0	0	23.54	0.35	5.06579701910089	0	23.54	1.37180645850742	0.103760007785792	0
S11	oboe	piano	47.09	74.2	23.54	23.54	0	0	0	23.54	0.35	5.06579701910089	7.78628652611354e-10	70.63	1.84898920625117	0.102572276798273	459.090911013032
S11	oboe	piano	0	74.5	0	0	0	0	0	23.54	0.35	5.06579701910089	0	23.54	1.37180645850742	0.106176888846198	0
S11	oboe	piano	47.09	74.2	47.09	0	0	0	0	23.54	0.35	5.06579701910089	2.05123679000264e-10	70.63	1.84898920625117	0.102572276798273	459.090911013032
S11	oboe	piano	47.09	73.7	47.09	0	0	0	0	23.54	0.35	5.06579701910089	2.05123679000264e-10	70.63	1.84898920625117	0.0968344735168199	486.293757685589
S11	oboe	forte	306.06	82.4	306.06	0	0	0	0	23.54	0.35	5.06579701910089	1.33330391350172e-09	329.6	2.51798720302508	0.263651347711282	1160.85126306716
S11	oboe	forte	117.72	80.6	117.72	0	0	0	0	23.54	0.35	5.06579701910089	5.1280919750066e-10	141.26	2.15001920191515	0.214303861047521	549.31348144911
S11	oboe	forte	94.17	80.4	94.17	0	0	0	0	23.54	0.35	5.06579701910089	4.10247358000528e-10	117.71	2.07081335970272	0.20942570961018	449.658259128193
S11	oboe	forte	23.54	82.4	23.54	0	0	0	0	23.54	0.35	5.06579701910089	1.02561839500132e-10	47.08	1.6728364541714	0.263651347711282	89.2845805809349
S11	oboe	forte	47.09	81.3	47.09	0	0	0	0	23.54	0.35	5.06579701910089	2.05123679000264e-10	70.63	1.84898920625117	0.232289722768068	202.720978951864
S12	clarinette	breathing	0	62.9	0	0	0	0	0	7.85	0.35	5.06579701910089	0	7.85	0.894869656745253	0.0279273672211188	0
S12	clarinette	breathing	0	62.9	0	0	0	0	0	7.85	0.35	5.06579701910089	0	7.85	0.894869656745253	0.0279273672211188	0
S12	clarinette	breathing	0	62.9	0	0	0	0	0	7.85	0.35	5.06579701910089	0	7.85	0.894869656745253	0.0279273672211188	0
S12	clarinette	breathing	7.85	62.9	0	7.85	0	0	0	7.85	0.35	5.06579701910089	2.25355604370407e-10	15.7	1.19589965240923	0.0279273672211188	281.086288508564
S12	clarinette	breathing	NA	62.9	NA	NA	NA	NA	NA	7.85	0.35	5.06579701910089	NA	NA	NA	0.0279273672211188	NA
S12	clarinette	speaking	0	66.7	0	0	0	0	0	7.85	0.35	5.06579701910089	0	7.85	0.894869656745253	0.0432543704745404	0
S12	clarinette	speaking	31.39	67.6	31.39	0	0	0	0	7.85	0.35	5.06579701910089	1.36749119333509e-10	39.24	1.59372899870791	0.0479766583803898	654.276497356691
S12	clarinette	speaking	0	67.7	0	0	0	0	0	7.85	0.35	5.06579701910089	0	7.85	0.894869656745253	0.0485322019016483	0
S12	clarinette	speaking	7.85	67.5	7.85	0	0	0	0	7.85	0.35	5.06579701910089	3.41872798333773e-11	15.7	1.19589965240923	0.0474274741132331	165.515877595719
S12	clarinette	speaking	23.54	67.7	23.54	0	0	0	0	7.85	0.35	5.06579701910089	1.02561839500132e-10	31.39	1.49679131570004	0.0485322019016483	485.038779977557
S12	clarinette	piano	141.26	68.7	141.26	0	0	0	0	23.54	0.35	5.06579701910089	6.15371037000792e-10	164.8	2.2169572073611	0.0544540261615583	2594.11488841797
S12	clarinette	piano	23.54	69.9	0	23.54	0	0	0	23.54	0.35	5.06579701910089	6.76066813111222e-10	47.08	1.6728364541714	0.0625215873424791	376.509954410677
S12	clarinette	piano	117.72	68.5	117.72	0	0	0	0	23.54	0.35	5.06579701910089	5.1280919750066e-10	141.26	2.15001920191515	0.0532145011959762	2212.17896164178
S12	clarinette	piano	23.54	70.7	23.54	0	0	0	0	23.54	0.35	5.06579701910089	1.02561839500132e-10	47.08	1.6728364541714	0.0685535573092901	343.381159547937
S12	clarinette	piano	117.72	68.9	117.72	0	0	0	0	23.54	0.35	5.06579701910089	5.1280919750066e-10	141.26	2.15001920191515	0.0557224233725954	2112.6145073205
S12	clarinette	forte	1153.61	83.6	988.81	141.26	23.54	0	0	23.54	0.35	5.06579701910089	2.11842280751894e-08	1177.15	3.07083180695691	0.302712249687241	3810.91284278022
S12	clarinette	forte	753.38	80.8	612.12	117.72	23.54	0	0	23.54	0.35	5.06579701910089	1.8867171830076e-08	776.92	2.89037630149425	0.219295639228637	3435.45363076978
S12	clarinette	forte	94.17	81.6	94.17	0	0	0	0	23.54	0.35	5.06579701910089	4.10247358000528e-10	117.71	2.07081335970272	0.240452886923483	391.635971623693
S12	clarinette	forte	23.54	82.7	23.54	0	0	0	0	23.54	0.35	5.06579701910089	1.02561839500132e-10	47.08	1.6728364541714	0.272916627317785	86.2534475504491
S12	clarinette	forte	70.63	80.8	47.09	23.54	0	0	0	23.54	0.35	5.06579701910089	8.81190492111486e-10	94.17	1.9739125704197	0.219295639228637	322.076627918539
S13	clarinette	breathing	15.7	63.5	7.85	0	7.85	0	0	7.85	0.35	5.06579701910089	4.30759725900554e-09	23.55	1.37199091146491	0.0299247131218887	524.649975291363
S13	clarinette	breathing	7.85	63.5	7.85	0	0	0	0	7.85	0.35	5.06579701910089	3.41872798333773e-11	15.7	1.19589965240923	0.0299247131218887	262.324987645681
S13	clarinette	breathing	7.85	63.5	7.85	0	0	0	0	7.85	0.35	5.06579701910089	3.41872798333773e-11	15.7	1.19589965240923	0.0299247131218887	262.324987645681
S13	clarinette	breathing	0	63.5	0	0	0	0	0	7.85	0.35	5.06579701910089	0	7.85	0.894869656745253	0.0299247131218887	0
S13	clarinette	breathing	31.39	63.5	23.54	0	7.85	0	0	7.85	0.35	5.06579701910089	4.3759718186723e-09	39.24	1.59372899870791	0.0299247131218887	1048.96577862394
S13	clarinette	speaking	470.86	77	345.3	102.02	23.54	0	0	7.85	0.35	5.06579701910089	1.72540931070004e-08	478.71	2.68007249975991	0.141589156876828	3325.53714130535
S13	clarinette	speaking	651.36	76	455.17	117.72	78.48	0	0	7.85	0.35	5.06579701910089	4.80972960876137e-08	659.21	2.81902378684421	0.126191468896039	5161.68014920736
S13	clarinette	speaking	596.43	76	376.69	196.19	23.54	0	0	7.85	0.35	5.06579701910089	2.00951094787788e-08	604.28	2.78123822053776	0.126191468896039	4726.38923389791
S13	clarinette	speaking	368.84	76.5	235.43	86.32	47.09	0	0	7.85	0.35	5.06579701910089	2.91449899181088e-08	376.69	2.5759840911285	0.133668783513723	2759.35779696935
S13	clarinette	speaking	1310.57	78.2	957.42	290.37	62.78	0	0	7.85	0.35	5.06579701910089	4.66962853347544e-08	1318.42	3.1200537825082	0.16256610323282	8061.76671481791
S13	clarinette	piano	2966.43	70.4	2307.22	612.12	47.09	0	0	23.54	0.35	5.06579701910089	5.32692572869377e-08	2989.97	3.47566683083285	0.0662262242965183	44792.3769097607
S13	clarinette	piano	6945.22	69.3	5344.29	1530.3	70.63	0	0	23.54	0.35	5.06579701910089	1.05686570231309e-07	6968.76	3.84315550793065	0.0583485402800233	119029.884323907
S13	clarinette	piano	7580.88	69.9	5720.98	1695.1	164.8	0	0	23.54	0.35	5.06579701910089	1.63340947105155e-07	7604.42	3.88106609539029	0.0625215873424791	121252.199795787
S13	clarinette	piano	2801.63	70.7	2189.51	565.03	47.09	0	0	23.54	0.35	5.06579701910089	5.14043144632146e-08	2825.17	3.45104458590433	0.0685535573092901	40867.7552261804
S13	clarinette	piano	3507.92	67.5	2895.8	565.03	47.09	0	0	23.54	0.35	5.06579701910089	5.44811696482186e-08	3531.46	3.54795429146566	0.0474274741132331	73963.8799153596
S13	clarinette	forte	6898.13	83.7	5273.66	1483.22	141.26	0	0	23.54	0.35	5.06579701910089	1.42487440899136e-07	6921.67	3.84021088987354	0.306217492336406	22526.8972956705
S13	clarinette	forte	7439.62	83.8	5720.98	1530.3	188.34	0	0	23.54	0.35	5.06579701910089	1.71428709350894e-07	7463.16	3.87292275240322	0.309763323782496	24017.110577054
S13	clarinette	forte	12878.08	85.8	10288.34	2377.85	211.89	0	0	23.54	0.35	5.06579701910089	2.28484341423439e-07	12901.62	4.110644246182	0.389968919951609	33023.3496597576
S13	clarinette	forte	11795.1	85.4	9746.85	1954.08	94.17	0	0	23.54	0.35	5.06579701910089	1.49855066791352e-07	11818.64	4.07256750408523	0.372417427332574	31671.7187068338
S13	clarinette	forte	8428.43	86.1	6803.96	1483.22	141.26	0	0	23.54	0.35	5.06579701910089	1.49153960466644e-07	8451.97	3.92695794686849	0.403673272736312	20879.3362584241
S14	clarinette	breathing	0	61.4	0	0	0	0	0	7.85	0.35	5.06579701910089	0	7.85	0.894869656745253	0.0234979510987906	0
S14	clarinette	breathing	7.85	61.4	7.85	0	0	0	0	7.85	0.35	5.06579701910089	3.41872798333773e-11	15.7	1.19589965240923	0.0234979510987906	334.071679994433
S14	clarinette	breathing	0	61.4	0	0	0	0	0	7.85	0.35	5.06579701910089	0	7.85	0.894869656745253	0.0234979510987906	0
S14	clarinette	breathing	7.85	61.4	7.85	0	0	0	0	7.85	0.35	5.06579701910089	3.41872798333773e-11	15.7	1.19589965240923	0.0234979510987906	334.071679994433
S14	clarinette	breathing	109.87	61.4	47.09	62.78	0	0	0	7.85	0.35	5.06579701910089	2.00796851396352e-09	117.72	2.07085025342757	0.0234979510987906	4675.72681286476
S14	clarinette	speaking	47.09	65.9	47.09	0	0	0	0	7.85	0.35	5.06579701910089	2.05123679000264e-10	54.94	1.73988865508454	0.0394484547222971	1193.70962263279
S14	clarinette	speaking	102.02	65.4	94.17	0	7.85	0	0	7.85	0.35	5.06579701910089	4.68365733717269e-09	109.87	2.04087912451579	0.0372417427332574	2739.39919328466
S14	clarinette	speaking	149.11	66.7	78.48	47.09	23.54	0	0	7.85	0.35	5.06579701910089	1.45142363620727e-08	156.96	2.19578899003587	0.0432543704745404	3447.28170504219
S14	clarinette	speaking	94.17	67.3	86.32	7.85	0	0	0	7.85	0.35	5.06579701910089	6.01415682537558e-10	102.02	2.00868531919517	0.0463478929993696	2031.80757324353
S14	clarinette	speaking	133.41	68.6	94.17	31.39	7.85	0	0	7.85	0.35	5.06579701910089	5.58507975465432e-09	141.26	2.15001920191515	0.0538306960785383	2478.32574569269
S14	clarinette	piano	4779.25	71.8	3672.73	1059.44	47.09	0	0	23.54	0.35	5.06579701910089	7.20631134270586e-08	4802.79	3.68149359770807	0.0778090289988561	61422.8202239905
S14	clarinette	piano	3107.69	70.4	2424.94	612.12	70.63	0	0	23.54	0.35	5.06579701910089	6.66022964219549e-08	3131.23	3.49571496926565	0.0662262242965183	46925.3688098807
S14	clarinette	piano	3037.06	71.6	2354.31	635.66	47.09	0	0	23.54	0.35	5.06579701910089	5.41504477790492e-08	3060.6	3.48580657391483	0.0760378792641122	39941.408537329
S14	clarinette	piano	3084.15	71.7	2448.48	565.03	70.63	0	0	23.54	0.35	5.06579701910089	6.53527246352326e-08	3107.69	3.49243769030775	0.0769183564090707	40096.4105836809
S14	clarinette	piano	2048.25	71.3	1530.3	517.95	0	0	0	23.54	0.35	5.06579701910089	2.15399894559555e-08	2071.79	3.31634573250986	0.0734564600996169	27883.8647713529
S14	clarinette	forte	4190.67	77.7	3366.66	706.29	117.72	0	0	23.54	0.35	5.06579701910089	9.9049497129438e-08	4214.21	3.62471617331499	0.153472297872364	27305.7096172835
S14	clarinette	forte	2683.91	77.9	2260.14	400.23	23.54	0	0	23.54	0.35	5.06579701910089	3.41593023524199e-08	2707.45	3.43256044501126	0.157047126922015	17089.8382708571
S14	clarinette	forte	5979.95	78.5	4685.08	1082.98	211.89	0	0	23.54	0.35	5.06579701910089	1.66890948901291e-07	6003.49	3.77840379156701	0.168279028329039	35535.91947481
S14	clarinette	forte	3460.84	78.3	2660.37	753.38	47.09	0	0	23.54	0.35	5.06579701910089	5.8864085758107e-08	3484.38	3.54212551226667	0.164448529989414	21045.1257923849
S14	clarinette	forte	5509.09	79.3	4708.62	682.75	94.17	0	23.54	23.54	0.35	5.06579701910089	7.67466038341539e-07	5532.63	3.74293162732037	0.184514285430953	29857.2546138254
S15	clarinette	breathing	23.54	62.7	15.7	7.85	0	0	0	7.85	0.35	5.06579701910089	2.93730164037162e-10	31.39	1.49679131570004	0.0272916627317785	862.53447550449
S15	clarinette	breathing	23.54	62.7	15.7	7.85	0	0	0	7.85	0.35	5.06579701910089	2.93730164037162e-10	31.39	1.49679131570004	0.0272916627317785	862.53447550449
S15	clarinette	breathing	15.7	62.7	15.7	0	0	0	0	7.85	0.35	5.06579701910089	6.83745596667547e-11	23.55	1.37199091146491	0.0272916627317785	575.267258514039
S15	clarinette	breathing	7.85	62.7	7.85	0	0	0	0	7.85	0.35	5.06579701910089	3.41872798333773e-11	15.7	1.19589965240923	0.0272916627317785	287.63362925702
S15	clarinette	breathing	7.85	62.7	7.85	0	0	0	0	7.85	0.35	5.06579701910089	3.41872798333773e-11	15.7	1.19589965240923	0.0272916627317785	287.63362925702
S15	clarinette	speaking	70.63	66	62.78	7.85	0	0	0	7.85	0.35	5.06579701910089	4.98853843037426e-10	78.48	1.89475899437189	0.0399052462993776	1769.94271555471
S15	clarinette	speaking	7.85	63.9	7.85	0	0	0	0	7.85	0.35	5.06579701910089	3.41872798333773e-11	15.7	1.19589965240923	0.031335021402163	250.51841832979
S15	clarinette	speaking	31.39	64.6	15.7	7.85	7.85	0	0	7.85	0.35	5.06579701910089	4.56714014320933e-09	39.24	1.59372899870791	0.0339648730492349	924.190117080598
S15	clarinette	speaking	7.85	65.3	7.85	0	0	0	0	7.85	0.35	5.06579701910089	3.41872798333773e-11	15.7	1.19589965240923	0.0368154400293791	213.22575511078
S15	clarinette	speaking	23.54	65.7	15.7	7.85	0	0	0	7.85	0.35	5.06579701910089	2.93730164037162e-10	31.39	1.49679131570004	0.0385504982638187	610.627645819387
S15	clarinette	piano	164.8	73.1	141.26	0	23.54	0	0	23.54	0.35	5.06579701910089	1.34356009745173e-08	188.34	2.27494256608369	0.0903711888749844	1823.59004071505
S15	clarinette	piano	141.26	71.5	94.17	47.09	0	0	0	23.54	0.35	5.06579701910089	1.76238098422297e-09	164.8	2.2169572073611	0.0751674808576889	1879.2701097359
S15	clarinette	piano	117.72	71	117.72	0	0	0	0	23.54	0.35	5.06579701910089	5.1280919750066e-10	141.26	2.15001920191515	0.0709626778467151	1658.90019334226
S15	clarinette	piano	329.6	72.2	282.52	47.09	0	0	0	23.54	0.35	5.06579701910089	2.58287570022403e-09	353.14	2.54794691267891	0.0814760555608226	4045.36029304893
S15	clarinette	piano	164.8	69.5	164.8	0	0	0	0	23.54	0.35	5.06579701910089	7.17932876500924e-10	188.34	2.27494256608369	0.0597076523783592	2760.1152186605
S15	clarinette	forte	612.12	84.3	470.86	70.63	70.63	0	0	23.54	0.35	5.06579701910089	4.25401270418858e-08	635.66	2.80322488356222	0.328117954639908	1865.54862769326
S15	clarinette	forte	894.64	83	706.29	164.8	23.54	0	0	23.54	0.35	5.06579701910089	2.0629552814299e-08	918.18	2.96292782863449	0.282507508924551	3166.78308270712
S15	clarinette	forte	824.01	81.1	447.32	282.52	94.17	0	0	23.54	0.35	5.06579701910089	6.13423964579032e-08	847.55	2.92816532821266	0.227002163134463	3629.96540923667
S15	clarinette	forte	1506.76	79.1	1365.5	117.72	23.54	0	0	23.54	0.35	5.06579701910089	2.21491506940803e-08	1530.3	3.18477657825085	0.180314227521191	8356.30122322388
S15	clarinette	forte	918.18	81.5	776.92	94.17	47.09	0	0	23.54	0.35	5.06579701910089	3.17292678309822e-08	941.72	2.97392179394886	0.237700445487404	3862.76095577892
S16	clarinette	breathing	0	62.2	0	0	0	0	0	7.85	0.35	5.06579701910089	0	7.85	0.894869656745253	0.0257649910338627	0
S16	clarinette	breathing	7.85	62.2	0	7.85	0	0	0	7.85	0.35	5.06579701910089	2.25355604370407e-10	15.7	1.19589965240923	0.0257649910338627	304.676993276761
S16	clarinette	breathing	0	62.2	0	0	0	0	0	7.85	0.35	5.06579701910089	0	7.85	0.894869656745253	0.0257649910338627	0
S16	clarinette	breathing	0	62.2	0	0	0	0	0	7.85	0.35	5.06579701910089	0	7.85	0.894869656745253	0.0257649910338627	0
S16	clarinette	breathing	23.54	62.2	7.85	0	15.7	0	0	7.85	0.35	5.06579701910089	8.58100723817771e-09	31.39	1.49679131570004	0.0257649910338627	913.642856271969
S16	clarinette	speaking	125.56	63	102.02	23.54	0	0	0	7.85	0.35	5.06579701910089	1.12050145094513e-09	133.41	2.1251883841686	0.0282507508924551	4444.48363436362
S16	clarinette	speaking	47.09	64.8	47.09	0	0	0	0	7.85	0.35	5.06579701910089	2.05123679000264e-10	54.94	1.73988865508454	0.0347560165749875	1354.87333246034
S16	clarinette	speaking	70.63	64	31.39	31.39	7.85	0	0	7.85	0.35	5.06579701910089	5.3115815159873e-09	78.48	1.89475899437189	0.0316978638492223	2228.2258620318
S16	clarinette	speaking	94.17	63.9	39.24	47.09	7.85	0	0	7.85	0.35	5.06579701910089	5.7964800045615e-09	102.02	2.00868531919517	0.031335021402163	3005.2636247282
S16	clarinette	speaking	164.8	64.1	109.87	47.09	7.85	0	0	7.85	0.35	5.06579701910089	6.10416552306189e-09	172.65	2.23716658268547	0.0320649078138008	5139.57504437514
S16	clarinette	piano	1341.96	70.5	988.81	282.52	70.63	0	0	23.54	0.35	5.06579701910089	5.08810888288897e-08	1365.5	3.13529170447575	0.0669930878315655	20031.3202964157
S16	clarinette	piano	824.01	69.9	635.66	188.34	0	0	0	23.54	0.35	5.06579701910089	8.17770417139334e-09	847.55	2.92816532821266	0.0625215873424791	13179.607796684
S16	clarinette	piano	353.15	70.1	188.34	164.8	0	0	0	23.54	0.35	5.06579701910089	5.55296240777961e-09	376.69	2.5759840911285	0.0639779021938279	5519.87464249913
S16	clarinette	piano	1365.5	70.9	1012.35	329.6	23.54	0	0	23.54	0.35	5.06579701910089	2.66953244195793e-08	1389.04	3.14271475223808	0.0701503747905137	19465.3272213829
S16	clarinette	piano	47.09	67.9	47.09	0	0	0	0	23.54	0.35	5.06579701910089	2.05123679000264e-10	70.63	1.84898920625117	0.0496626621059115	948.197257319292
S16	clarinette	forte	3484.38	86.1	2778.09	682.75	23.54	0	0	23.54	0.35	5.06579701910089	4.45284645787575e-08	3507.92	3.54504968048798	0.403673272736312	8631.68367918198
S16	clarinette	forte	2966.43	81.7	2424.94	447.32	94.17	0	0	23.54	0.35	5.06579701910089	7.46900586676928e-08	2989.97	3.47566683083285	0.243237200129274	12195.6263204124
S16	clarinette	forte	1859.91	80.6	1648.02	141.26	70.63	0	0	23.54	0.35	5.06579701910089	4.96964194562261e-08	1883.45	3.27495409546452	0.214303861047521	8678.84503297667
S16	clarinette	forte	2754.54	81.3	2142.42	612.12	0	0	0	23.54	0.35	5.06579701910089	2.69108645354038e-08	2778.08	3.44374474790206	0.232289722768068	11858.2086507129
S16	clarinette	forte	1836.36	81.4	1553.85	258.97	23.54	0	0	23.54	0.35	5.06579701910089	2.70260462887486e-08	1859.9	3.26948959442453	0.234979510987906	7814.97923916657
S17	clarinette	breathing	78.48	62.4	54.93	15.7	7.85	0	0	7.85	0.35	5.06579701910089	4.96343214674662e-09	86.33	1.93616174091116	0.0263651347711282	2976.65840441452
S17	clarinette	breathing	102.02	62.4	70.63	23.54	7.85	0	0	7.85	0.35	5.06579701910089	5.25716231078378e-09	109.87	2.04087912451579	0.0263651347711282	3869.50421022386
S17	clarinette	breathing	62.78	62.4	54.93	7.85	0	0	0	7.85	0.35	5.06579701910089	4.64666563204049e-10	70.63	1.84898920625117	0.0263651347711282	2381.17500801661
S17	clarinette	breathing	39.24	62.4	23.54	15.7	0	0	0	7.85	0.35	5.06579701910089	5.53273048240946e-10	47.09	1.67292869044272	0.0263651347711282	1488.32920220726
S17	clarinette	breathing	54.93	62.4	54.93	0	0	0	0	7.85	0.35	5.06579701910089	2.39310958833641e-10	62.78	1.79782131136402	0.0263651347711282	2083.43330981765
S17	clarinette	speaking	258.97	66.1	156.95	70.63	31.39	0	0	7.85	0.35	5.06579701910089	1.98055859526899e-08	266.82	2.42621837983258	0.0403673272736312	6415.33679563583
S17	clarinette	speaking	2307.22	67.1	1553.85	682.75	70.63	0	0	7.85	0.35	5.06579701910089	6.48357087997836e-08	2315.07	3.36456412717001	0.0452928861518612	50940.0083771255
S17	clarinette	speaking	3413.75	67.5	2472.03	800.47	141.26	0	0	7.85	0.35	5.06579701910089	1.10676644418394e-07	3421.6	3.53422923724875	0.0474274741132331	71978.3219289661
S17	clarinette	speaking	470.86	66.4	392.39	54.93	23.54	0	0	7.85	0.35	5.06579701910089	1.61070831597782e-08	478.71	2.68007249975991	0.0417859226170808	11268.3882635519
S17	clarinette	speaking	572.88	67.2	455.17	94.17	23.54	0	0	7.85	0.35	5.06579701910089	1.75073594202973e-08	580.73	2.76397426188303	0.0458173530553555	12503.5594986873
S17	clarinette	piano	306.06	78.4	211.89	94.17	0	0	0	23.54	0.35	5.06579701910089	3.62732380794608e-09	329.6	2.51798720302508	0.166352754220534	1839.82526429503
S17	clarinette	piano	1035.9	77.3	918.18	94.17	23.54	0	0	23.54	0.35	5.06579701910089	1.95244089304665e-08	1059.44	3.02507636604278	0.146564906627781	7067.85835596234
S17	clarinette	piano	376.69	76.5	258.97	117.72	0	0	0	23.54	0.35	5.06579701910089	4.50851430005756e-09	400.23	2.60230963888826	0.133668783513723	2818.08504647106
S17	clarinette	piano	541.49	75.3	494.41	47.09	0	0	0	23.54	0.35	5.06579701910089	3.50593225572522e-09	565.03	2.75207150709125	0.116420643554174	4651.15106280981
S17	clarinette	piano	470.86	77.7	447.32	23.54	0	0	0	23.54	0.35	5.06579701910089	2.62474176361373e-09	494.4	2.69407846208076	0.153472297872364	3068.04554651025
S17	clarinette	forte	2236.6	88.7	1671.56	517.95	47.09	0	0	23.54	0.35	5.06579701910089	4.77958203679893e-08	2260.14	3.35413534151214	0.544540261615583	4107.31796647008
S17	clarinette	forte	1718.65	89.2	1247.78	400.23	70.63	0	0	23.54	0.35	5.06579701910089	5.53896031289473e-08	1742.19	3.24109551660269	0.576806300625321	2979.59644015122
S17	clarinette	forte	1412.59	88.5	941.72	400.23	70.63	0	0	23.54	0.35	5.06579701910089	5.40562992154455e-08	1436.13	3.15719375447957	0.532145011959762	2654.52079461907
S17	clarinette	forte	941.72	86.3	659.21	235.43	47.09	0	0	23.54	0.35	5.06579701910089	3.52728595121489e-08	965.26	2.98464430956811	0.413076031162105	2279.77401000649
S17	clarinette	forte	1318.41	85.6	1035.9	258.97	23.54	0	0	23.54	0.35	5.06579701910089	2.47696858197457e-08	1341.95	3.1277363346641	0.381092143592649	3459.55701833952
S18	trumpet	breathing	0	63	0	0	0	0	0	7.85	0.35	5.06579701910089	0	7.85	0.894869656745253	0.0282507508924551	0
S18	trumpet	breathing	0	63	0	0	0	0	0	7.85	0.35	5.06579701910089	0	7.85	0.894869656745253	0.0282507508924551	0
S18	trumpet	breathing	0	63	0	0	0	0	0	7.85	0.35	5.06579701910089	0	7.85	0.894869656745253	0.0282507508924551	0
S18	trumpet	breathing	0	63	0	0	0	0	0	7.85	0.35	5.06579701910089	0	7.85	0.894869656745253	0.0282507508924551	0
S18	trumpet	breathing	0	63	0	0	0	0	0	7.85	0.35	5.06579701910089	0	7.85	0.894869656745253	0.0282507508924551	0
S18	trumpet	speaking	7.85	68.7	0	7.85	0	0	0	7.85	0.35	5.06579701910089	2.25355604370407e-10	15.7	1.19589965240923	0.0544540261615583	144.158302945498
S18	trumpet	speaking	23.54	68.4	23.54	0	0	0	0	7.85	0.35	5.06579701910089	1.02561839500132e-10	31.39	1.49679131570004	0.0526053598379077	447.4829194693
S18	trumpet	speaking	15.7	66.9	0	15.7	0	0	0	7.85	0.35	5.06579701910089	4.50711208740814e-10	23.55	1.37199091146491	0.0442618941921128	354.706916334314
S18	trumpet	speaking	39.24	66.9	23.54	7.85	7.85	0	0	7.85	0.35	5.06579701910089	4.6013274230427e-09	47.09	1.67292869044272	0.0442618941921128	886.541362863597
S18	trumpet	speaking	23.54	68.5	15.7	7.85	0	0	0	7.85	0.35	5.06579701910089	2.93730164037162e-10	31.39	1.49679131570004	0.0532145011959762	442.360624847499
S18	trumpet	piano	23.54	75.9	23.54	0	0	0	0	23.54	0.35	5.06579701910089	1.02561839500132e-10	47.08	1.6728364541714	0.124746967096484	188.701982484218
S18	trumpet	piano	23.54	75.1	23.54	0	0	0	0	23.54	0.35	5.06579701910089	1.02561839500132e-10	47.08	1.6728364541714	0.113770586168768	206.907609362938
S18	trumpet	piano	0	74.2	0	0	0	0	0	23.54	0.35	5.06579701910089	0	23.54	1.37180645850742	0.102572276798273	0
S18	trumpet	piano	70.63	75	70.63	0	0	0	0	23.54	0.35	5.06579701910089	3.07685518500396e-10	94.17	1.9739125704197	0.11246826503807	627.999373655245
S18	trumpet	piano	47.09	75.6	23.54	23.54	0	0	0	23.54	0.35	5.06579701910089	7.78628652611354e-10	70.63	1.84898920625117	0.120511917214872	390.749737356174
S18	trumpet	forte	1530.3	91.2	1106.53	329.6	94.17	0	0	23.54	0.35	5.06579701910089	6.55662615901293e-08	1553.84	3.19140629715824	0.726156109540203	2107.3980923592
S18	trumpet	forte	635.66	92.1	541.49	94.17	0	0	0	23.54	0.35	5.06579701910089	5.06318956094792e-09	659.2	2.81901719868906	0.805434068650917	789.214194856092
S18	trumpet	forte	776.92	89.7	659.21	70.63	47.09	0	0	23.54	0.35	5.06579701910089	3.05403918203704e-08	800.46	2.90333963455224	0.610984222643103	1271.58766332633
S18	trumpet	forte	1271.33	92.1	918.18	329.6	23.54	0	0	23.54	0.35	5.06579701910089	2.62850770615788e-08	1294.87	3.11222616909939	0.805434068650917	1578.44080537771
S18	trumpet	forte	1130.07	92	894.64	164.8	70.63	0	0	23.54	0.35	5.06579701910089	4.70905074053331e-08	1153.61	3.06205901204768	0.796214341106994	1419.30374982802
S19	trumpet	breathing	86.32	63	39.24	7.85	39.24	0	0	7.85	0.35	5.06579701910089	2.17633418993981e-08	94.17	1.9739125704197	0.0282507508924551	3055.49400540194
S19	trumpet	breathing	39.24	63	23.54	15.7	0	0	0	7.85	0.35	5.06579701910089	5.53273048240946e-10	47.09	1.67292869044272	0.0282507508924551	1388.98962896168
S19	trumpet	breathing	47.09	63	31.39	7.85	7.85	0	0	7.85	0.35	5.06579701910089	4.63551470287608e-09	54.94	1.73988865508454	0.0282507508924551	1666.85834933245
S19	trumpet	breathing	7.85	63	0	0	7.85	0	0	7.85	0.35	5.06579701910089	4.27340997917217e-09	15.7	1.19589965240923	0.0282507508924551	277.868720370774
S19	trumpet	breathing	62.78	63	54.93	0	7.85	0	0	7.85	0.35	5.06579701910089	4.51272093800581e-09	70.63	1.84898920625117	0.0282507508924551	2222.24181718181
S19	trumpet	speaking	156.95	65.5	102.02	47.09	7.85	0	0	7.85	0.35	5.06579701910089	6.06997824322851e-09	164.8	2.2169572073611	0.037672981789796	4166.11567610268
S19	trumpet	speaking	211.89	66.3	156.95	15.7	39.24	0	0	7.85	0.35	5.06579701910089	2.25015067012692e-08	219.74	2.34190912017977	0.0413076031162106	5129.56414836974
S19	trumpet	speaking	156.95	67.3	102.02	23.54	31.39	0	0	7.85	0.35	5.06579701910089	1.82141413676338e-08	164.8	2.2169572073611	0.0463478929993696	3386.34595540589
S19	trumpet	speaking	164.8	67.6	117.72	23.54	23.54	0	0	7.85	0.35	5.06579701910089	1.40091059481284e-08	172.65	2.23716658268547	0.0479766583803898	3435.00371979556
S19	trumpet	speaking	188.34	67.1	133.41	39.24	15.7	0	0	7.85	0.35	5.06579701910089	1.02547817373638e-08	196.19	2.29267686718512	0.0452928861518612	4158.26890272615
S19	trumpet	piano	23.54	82.7	23.54	0	0	0	0	23.54	0.35	5.06579701910089	1.02561839500132e-10	47.08	1.6728364541714	0.272916627317785	86.2534475504491
S19	trumpet	piano	0	78.8	0	0	0	0	0	23.54	0.35	5.06579701910089	0	23.54	1.37180645850742	0.174192717991216	0
S19	trumpet	piano	70.63	77.1	70.63	0	0	0	0	23.54	0.35	5.06579701910089	3.07685518500396e-10	94.17	1.9739125704197	0.14322868204258	493.127486706905
S19	trumpet	piano	164.8	79.4	94.17	47.09	23.54	0	0	23.54	0.35	5.06579701910089	1.45826109217395e-08	188.34	2.27494256608369	0.186650860159398	882.931907515787
S19	trumpet	piano	211.89	77.4	164.8	47.09	0	0	0	23.54	0.35	5.06579701910089	2.07006650272337e-09	235.43	2.3718618026209	0.148262048260184	1429.15872596173
S19	trumpet	forte	2660.37	95.1	2001.16	588.58	70.63	0	0	23.54	0.35	5.06579701910089	6.40801164978413e-08	2683.91	3.4287679484721	1.13770586168768	2338.36362243364
S19	trumpet	forte	5038.23	96.8	3790.44	1200.7	47.09	0	0	23.54	0.35	5.06579701910089	7.66323235032266e-08	5061.77	3.70430240751521	1.38366194183787	3641.22900808263
S19	trumpet	forte	4873.42	96.5	3955.24	871.1	47.09	0	0	23.54	0.35	5.06579701910089	6.78853209961704e-08	4896.96	3.68992655657076	1.33668783513723	3645.89238556187
S19	trumpet	forte	8781.58	95.4	7368.99	1341.96	70.63	0	0	23.54	0.35	5.06579701910089	1.09098353923431e-07	8805.12	3.94473527909747	1.17768731071118	7456.63124679249
S19	trumpet	forte	19470.15	98.2	17445.45	1954.08	70.63	0	0	23.54	0.35	5.06579701910089	1.70572558370379e-07	19493.69	4.28989405538001	1.6256610323282	11976.7587540163
S20	trumpet	breathing	7.85	62.8	7.85	0	0	0	0	7.85	0.35	5.06579701910089	3.41872798333773e-11	15.7	1.19589965240923	0.0276076852920577	284.341114329434
S20	trumpet	breathing	23.54	62.8	15.7	0	7.85	0	0	7.85	0.35	5.06579701910089	4.34178453883892e-09	31.39	1.49679131570004	0.0276076852920577	852.661125008264
S20	trumpet	breathing	54.93	62.8	23.54	7.85	23.54	0	0	7.85	0.35	5.06579701910089	1.3148147381387e-08	62.78	1.79782131136402	0.0276076852920577	1989.66336434596
S20	trumpet	breathing	15.7	62.8	0	0	15.7	0	0	7.85	0.35	5.06579701910089	8.54681995834433e-09	23.55	1.37199091146491	0.0276076852920577	568.682228658868
S20	trumpet	breathing	7.85	62.8	7.85	0	0	0	0	7.85	0.35	5.06579701910089	3.41872798333773e-11	15.7	1.19589965240923	0.0276076852920577	284.341114329434
S20	trumpet	speaking	102.02	64.7	86.32	15.7	0	0	0	7.85	0.35	5.06579701910089	8.26771286907965e-10	109.87	2.04087912451579	0.0343581677431518	2969.30851384921
S20	trumpet	speaking	54.93	64.6	54.93	0	0	0	0	7.85	0.35	5.06579701910089	2.39310958833641e-10	62.78	1.79782131136402	0.0339648730492349	1617.25909943413
S20	trumpet	speaking	47.09	64.7	47.09	0	0	0	0	7.85	0.35	5.06579701910089	2.05123679000264e-10	54.94	1.73988865508454	0.0343581677431518	1370.56202624152
S20	trumpet	speaking	86.32	63.8	78.48	7.85	0	0	0	7.85	0.35	5.06579701910089	5.67228402704181e-10	94.17	1.9739125704197	0.0309763323782496	2786.64365251357
S20	trumpet	speaking	125.56	65.2	109.87	15.7	0	0	0	7.85	0.35	5.06579701910089	9.29333126408097e-10	133.41	2.1251883841686	0.0363940171721997	3450.01760607816
S20	trumpet	piano	117.72	71.2	94.17	23.54	0	0	0	23.54	0.35	5.06579701910089	1.08631417111175e-09	141.26	2.15001920191515	0.0726156109540203	1621.13901478484
S20	trumpet	piano	23.54	71.9	0	23.54	0	0	0	23.54	0.35	5.06579701910089	6.76066813111222e-10	47.08	1.6728364541714	0.0787100150911555	299.072487443153
S20	trumpet	piano	141.26	72.9	141.26	0	0	0	0	23.54	0.35	5.06579701910089	6.15371037000792e-10	164.8	2.2169572073611	0.0883140894706626	1599.51827445298
S20	trumpet	piano	23.54	73	23.54	0	0	0	0	23.54	0.35	5.06579701910089	1.02561839500132e-10	47.08	1.6728364541714	0.0893367184301926	263.497478009494
S20	trumpet	piano	0	73.1	0	0	0	0	0	23.54	0.35	5.06579701910089	0	23.54	1.37180645850742	0.0903711888749844	0
S20	trumpet	forte	4167.13	95.4	3507.92	635.66	23.54	0	0	23.54	0.35	5.06579701910089	4.63557479770391e-08	4190.67	3.62228346307156	1.17768731071118	3538.40103574145
S20	trumpet	forte	2801.63	96.2	2213.05	470.86	117.72	0	0	23.54	0.35	5.06579701910089	8.72632988628193e-08	2825.17	3.45104458590433	1.29130845806931	2169.60555202189
S20	trumpet	forte	2165.97	94.8	1695.1	423.78	47.09	0	0	23.54	0.35	5.06579701910089	4.51941149550445e-08	2189.51	3.3403469330563	1.09908174771525	1970.70873436173
S20	trumpet	forte	2636.83	94	2330.77	258.97	47.09	0	0	23.54	0.35	5.06579701910089	4.32308169297695e-08	2660.37	3.42494204181287	1.00237446725455	2630.58376498969
S20	trumpet	forte	2989.98	95.3	2401.4	494.41	94.17	0	0	23.54	0.35	5.06579701910089	7.59396304544151e-08	3013.52	3.47907407812044	1.16420643554174	2568.25585971672
S21	trumpet	breathing	651.36	62	525.8	78.48	47.09	0	0	7.85	0.35	5.06579701910089	3.01845636675734e-08	659.21	2.81902378684421	0.0251785082358834	25869.6819485004
S21	trumpet	breathing	470.86	62	415.93	47.09	7.85	0	0	7.85	0.35	5.06579701910089	7.43746943656361e-09	478.71	2.68007249975991	0.0251785082358834	18700.8696301138
S21	trumpet	breathing	321.76	62	306.06	15.7	0	0	0	7.85	0.35	5.06579701910089	1.78401512224253e-09	329.61	2.51800037923545	0.0251785082358834	12779.1526402442
S21	trumpet	breathing	94.17	62	94.17	0	0	0	0	7.85	0.35	5.06579701910089	4.10247358000528e-10	102.02	2.00868531919517	0.0251785082358834	3740.09449319928
S21	trumpet	breathing	345.3	62	290.37	39.24	15.7	0	0	7.85	0.35	5.06579701910089	1.09385273340313e-08	353.15	2.54795921058719	0.0251785082358834	13714.0769725147
S21	trumpet	speaking	486.56	65.4	353.15	86.32	47.09	0	0	7.85	0.35	5.06579701910089	2.96577991156095e-08	494.41	2.69408724626542	0.0372417427332574	13064.9095420955
S21	trumpet	speaking	494.41	67.2	345.3	102.02	47.09	0	0	7.85	0.35	5.06579701910089	3.00743230445169e-08	502.26	2.70092859231244	0.0458173530553555	10790.889630893
S21	trumpet	speaking	808.31	65.1	588.58	149.11	70.63	0	0	7.85	0.35	5.06579701910089	4.53064922830905e-08	816.16	2.91177530618711	0.0359774183025758	22467.148509712
S21	trumpet	speaking	957.42	66.8	769.07	133.41	54.93	0	0	7.85	0.35	5.06579701910089	3.70952685521731e-08	965.27	2.98464880879353	0.043755232478991	21881.2687250537
S21	trumpet	speaking	698.45	67.9	572.88	94.17	31.39	0	0	7.85	0.35	5.06579701910089	2.22935785969701e-08	706.3	2.84898920625117	0.0496626621059115	14063.8856312308
S21	trumpet	piano	494.41	81.7	376.69	70.63	47.09	0	0	23.54	0.35	5.06579701910089	2.93096497463688e-08	517.95	2.71428783740514	0.243237200129274	2032.62494280166
S21	trumpet	piano	1695.1	78.1	871.1	494.41	306.06	0	23.54	23.54	0.35	5.06579701910089	8.60721993435776e-07	1718.64	3.23518491543802	0.160705224437123	10547.8835920684
S21	trumpet	piano	2683.91	80.2	1153.61	1059.44	447.32	23.54	0	23.54	0.35	5.06579701910089	3.81594745038457e-07	2707.45	3.43256044501126	0.204658598456151	13114.0837484776
S21	trumpet	piano	1106.53	79.6	776.92	211.89	117.72	0	0	23.54	0.35	5.06579701910089	7.35702917090878e-08	1130.07	3.05310534584816	0.190998517204287	5793.39576137381
S21	trumpet	piano	753.38	78.6	635.66	70.63	47.09	0	0	23.54	0.35	5.06579701910089	3.04378299808702e-08	776.92	2.89037630149425	0.170227607640475	4425.72159970172
S21	trumpet	forte	21706.75	96.1	15609.08	4284.85	1695.1	70.63	47.09	23.54	0.35	5.06579701910089	2.77391835979886e-06	21730.29	4.33706552220453	1.2765269723811	17004.536895535
S21	trumpet	forte	14102.32	96.3	10806.29	1977.62	1294.87	23.54	0	23.54	0.35	5.06579701910089	9.11539982695443e-07	14125.86	4.15001489768686	1.30626110529494	10795.9426663139
S21	trumpet	forte	28628.42	95	17916.31	7722.14	2942.89	23.54	23.54	23.54	0.35	5.06579701910089	2.680956869361e-06	28651.96	4.45715433618366	1.1246826503807	25454.6649139732
S21	trumpet	forte	39387.62	93.4	24390.66	10994.63	3884.61	117.72	0	23.54	0.35	5.06579701910089	3.05012440463596e-06	39411.16	4.59561921776804	0.935470282574396	42104.61917786
S21	trumpet	forte	14808.62	95.4	11512.58	2613.29	635.66	47.09	0	23.54	0.35	5.06579701910089	6.7646604308412e-07	14832.16	4.17120440172102	1.17768731071118	12574.322458359
S22	trumpet	breathing	15.7	61.9	15.7	0	0	0	0	7.85	0.35	5.06579701910089	6.83745596667547e-11	23.55	1.37199091146491	0.0248902922354277	630.76800591571
S22	trumpet	breathing	0	61.9	0	0	0	0	0	7.85	0.35	5.06579701910089	0	7.85	0.894869656745253	0.0248902922354277	0
S22	trumpet	breathing	7.85	61.9	7.85	0	0	0	0	7.85	0.35	5.06579701910089	3.41872798333773e-11	15.7	1.19589965240923	0.0248902922354277	315.384002957855
S22	trumpet	breathing	7.85	61.9	7.85	0	0	0	0	7.85	0.35	5.06579701910089	3.41872798333773e-11	15.7	1.19589965240923	0.0248902922354277	315.384002957855
S22	trumpet	breathing	0	61.9	0	0	0	0	0	7.85	0.35	5.06579701910089	0	7.85	0.894869656745253	0.0248902922354277	0
S22	trumpet	speaking	149.11	66.3	125.56	7.85	15.7	0	0	7.85	0.35	5.06579701910089	9.31917204004878e-09	156.96	2.19578899003587	0.0413076031162106	3609.74708652325
S22	trumpet	speaking	541.49	67.8	415.93	70.63	54.93	0	0	7.85	0.35	5.06579701910089	3.37539961247078e-08	549.34	2.73984122317355	0.0490941783137006	11029.6173314075
S22	trumpet	speaking	258.97	66.6	204.04	39.24	15.7	0	0	7.85	0.35	5.06579701910089	1.05624672558642e-08	266.82	2.42621837983258	0.0427592417900446	6056.46847695729
S22	trumpet	speaking	266.82	66.7	196.19	47.09	23.54	0	0	7.85	0.35	5.06579701910089	1.50270455595734e-08	274.67	2.43881122750957	0.0432543704745404	6168.62520648753
S22	trumpet	speaking	94.17	66.8	86.32	7.85	0	0	0	7.85	0.35	5.06579701910089	6.01415682537558e-10	102.02	2.00868531919517	0.043755232478991	2152.19974080164
S22	trumpet	piano	282.52	73.4	211.89	70.63	0	0	0	23.54	0.35	5.06579701910089	2.95125699483485e-09	306.06	2.48580657391483	0.0935470282574397	3020.08524763085
S22	trumpet	piano	70.63	71	47.09	23.54	0	0	0	23.54	0.35	5.06579701910089	8.81190492111486e-10	94.17	1.9739125704197	0.0709626778467151	995.311932176042
S22	trumpet	piano	659.21	78	588.58	70.63	0	0	0	23.54	0.35	5.06579701910089	4.59224642683697e-09	682.75	2.83426170881177	0.158865646944856	4149.48110354417
S22	trumpet	piano	164.8	73.7	141.26	23.54	0	0	0	23.54	0.35	5.06579701910089	1.29143785011201e-09	188.34	2.27494256608369	0.0968344735168199	1701.87324838788
S22	trumpet	piano	376.69	75	353.15	23.54	0	0	0	23.54	0.35	5.06579701910089	2.2144944056132e-09	400.23	2.60230963888826	0.11246826503807	3349.30035483781
S22	trumpet	forte	1530.3	94.2	1294.87	211.89	23.54	0	0	23.54	0.35	5.06579701910089	2.45457324280248e-08	1553.84	3.19140629715824	1.02572276798273	1491.92359550487
S22	trumpet	forte	3154.78	93.5	2707.46	376.69	70.63	0	0	23.54	0.35	5.06579701910089	6.10723703648442e-08	3178.32	3.50219762076244	0.946302517922961	3333.79647654793
S22	trumpet	forte	1059.44	93.6	871.1	164.8	23.54	0	0	23.54	0.35	5.06579701910089	2.13474856907999e-08	1082.98	3.03462043633923	0.957260184645276	1106.741946436
S22	trumpet	forte	1294.87	92.5	1153.61	141.26	0	0	0	23.54	0.35	5.06579701910089	9.0819310141738e-09	1318.41	3.12005048844311	0.843393006857164	1535.31033512505
S22	trumpet	forte	1153.61	92.2	1012.35	141.26	0	0	0	23.54	0.35	5.06579701910089	8.46655997717301e-09	1177.15	3.07083180695691	0.814760555608226	1415.8883761117
S23	trumpet	breathing	39.24	62.9	39.24	0	0	0	0	7.85	0.35	5.06579701910089	1.70936399166887e-10	47.09	1.67292869044272	0.0279273672211188	1405.07337083771
S23	trumpet	breathing	23.54	62.9	15.7	7.85	0	0	0	7.85	0.35	5.06579701910089	2.93730164037162e-10	31.39	1.49679131570004	0.0279273672211188	842.900793820586
S23	trumpet	breathing	7.85	62.9	7.85	0	0	0	0	7.85	0.35	5.06579701910089	3.41872798333773e-11	15.7	1.19589965240923	0.0279273672211188	281.086288508564
S23	trumpet	breathing	7.85	62.9	7.85	0	0	0	0	7.85	0.35	5.06579701910089	3.41872798333773e-11	15.7	1.19589965240923	0.0279273672211188	281.086288508564
S23	trumpet	breathing	0	62.9	0	0	0	0	0	7.85	0.35	5.06579701910089	0	7.85	0.894869656745253	0.0279273672211188	0
S23	trumpet	speaking	102.02	65.9	102.02	0	0	0	0	7.85	0.35	5.06579701910089	4.44434637833905e-10	109.87	2.04087912451579	0.0394484547222971	2586.15960290926
S23	trumpet	speaking	62.78	65	62.78	0	0	0	0	7.85	0.35	5.06579701910089	2.73498238667019e-10	70.63	1.84898920625117	0.0355655882007785	1765.18941977251
S23	trumpet	speaking	15.7	63.8	7.85	7.85	0	0	0	7.85	0.35	5.06579701910089	2.59542884203785e-10	23.55	1.37199091146491	0.0309763323782496	506.838569792205
S23	trumpet	speaking	15.7	63.7	15.7	0	0	0	0	7.85	0.35	5.06579701910089	6.83745596667547e-11	23.55	1.37199091146491	0.0306217492336406	512.707483828266
S23	trumpet	speaking	23.54	63.8	23.54	0	0	0	0	7.85	0.35	5.06579701910089	1.02561839500132e-10	31.39	1.49679131570004	0.0309763323782496	759.93502757379
S23	trumpet	piano	0	78.3	0	0	0	0	0	23.54	0.35	5.06579701910089	0	23.54	1.37180645850742	0.164448529989414	0
S23	trumpet	piano	47.09	81	47.09	0	0	0	0	23.54	0.35	5.06579701910089	2.05123679000264e-10	70.63	1.84898920625117	0.224403690860393	209.84503338359
S23	trumpet	piano	23.54	80.1	23.54	0	0	0	0	23.54	0.35	5.06579701910089	1.02561839500132e-10	47.08	1.6728364541714	0.20231589085198	116.352699241122
S23	trumpet	piano	0	79.3	0	0	0	0	0	23.54	0.35	5.06579701910089	0	23.54	1.37180645850742	0.184514285430953	0
S23	trumpet	piano	164.8	78.9	141.26	23.54	0	0	0	23.54	0.35	5.06579701910089	1.29143785011201e-09	188.34	2.27494256608369	0.176209774601603	935.248912113987
S23	trumpet	forte	2024.71	99.3	1789.28	188.34	47.09	0	0	23.54	0.35	5.06579701910089	3.88436941819328e-08	2048.25	3.31138296353143	1.84514285430953	1097.31883104394
S23	trumpet	forte	5744.52	100	5132.4	588.58	23.54	0	0	23.54	0.35	5.06579701910089	5.20803812763258e-08	5768.06	3.76102976931425	2	2872.26
S23	trumpet	forte	2778.09	100	2519.11	258.97	0	0	0	23.54	0.35	5.06579701910089	1.84108517707376e-08	2801.63	3.44741077921221	2	1389.045
S23	trumpet	forte	2424.94	98.8	2330.77	94.17	0	0	0	23.54	0.35	5.06579701910089	1.2857889362958e-08	2448.48	3.38889656090677	1.74192717991216	1392.10182145633
S23	trumpet	forte	1224.24	96.9	1059.44	164.8	0	0	0	23.54	0.35	5.06579701910089	9.34775046928449e-09	1247.78	3.09613802027555	1.39968399200455	874.654569883815
