# Supplementary material for: Investigation of the Emission Rate of Particles when Musicians Play Wind, Woodwind, and Brass Instruments
Source: Hindawi journal article supplement (doi:10.1155/2023/8092828), 2023-12-21
Supplement: f8 [file 8092828.f8.zip › data_sci_reports_muerbe_2021_medians.csv]

ID	Condition	PM	PVR	Instrument
S100	forte	376.69	4.27041822764856e-08	Singer
S200	forte	800.47	1.57356617478979e-07	Singer
S300	forte	2848.72	3.71224967017745e-07	Singer
S400	forte	2095.34	4.3993887428034e-07	Singer
S500	forte	2024.71	3.4453668409368e-07	Singer
S600	forte	3743.35	3.35018924100983e-07	Singer
S700	forte	8075.29	8.90051102391513e-07	Singer
S800	forte	3955.24	5.24201435904057e-07	Singer
S100	piano	447.32	1.08274627637861e-07	Singer
S200	piano	235.43	4.52004525291199e-08	Singer
S300	piano	23.54	1.12408698419566e-10	Singer
S400	piano	47.09	1.77670667656693e-09	Singer
S500	piano	23.54	9.44380972906482e-10	Singer
S600	piano	23.54	8.31972274486916e-10	Singer
S700	piano	70.63	3.44065122554076e-09	Singer
S800	piano	94.17	2.17637029218754e-08	Singer
S100	orchestral_excerpt	753.38	1.28889684174972e-07	Singer
S200	orchestral_excerpt	861.68	1.52030401506468e-07	Singer
S300	orchestral_excerpt	1078.27	1.64818885234711e-07	Singer
S400	orchestral_excerpt	1520.88	1.82311447488291e-07	Singer
S500	orchestral_excerpt	1553.85	2.01022684425999e-07	Singer
S600	orchestral_excerpt	6092.96	5.97103475731375e-07	Singer
S700	orchestral_excerpt	1761.02	3.00195636226098e-07	Singer
S800	orchestral_excerpt	1761.02	3.05522550888815e-07	Singer
