# Supplementary material for: Investigation of the Emission Rate of Particles when Musicians Play Wind, Woodwind, and Brass Instruments
Source: Hindawi journal article supplement (doi:10.1155/2023/8092828), 2023-12-21
Supplement: f8 [file 8092828.f8.zip › Schumann_2021_winds_Indoor_Air_data_analysis.Rmd]

---
title: \normalsize Data analysis
subtitle: \Large\``Investigation of the emission rate of particles when musicians play wind, woodwind and brass instruments\''
author:  
- Lukas Schumann$^1$, Dorothea von Zadow$^2$, Alexander Schmidt$^{2,3}$, Isabell Fernholz$^{2,3}$, 
- Anne Hartmann$^1$, Liliana Ifrim$^2$, Martin Kriegel$^1$, Joachim Seybold$^4$, 
- Dirk Mürbe$^2$, Mario Fleischer$^2$
date: \small$^1$Technische Universität Berlin, Hermann-Rietschel-Institut, Berlin, Germany \newline $^2$Charité -- Universitätsmedizin Berlin, Corporate Member of Freie Universität Berlin and Humboldt-Universität Berlin, Department of Audiology and Phoniatrics, Berlin, Germany \newline $^3$ Kurt-Singer-Institute for Music Physiology and Musicians Health, Hanns Eisler School of Music, Berlin, Germany \newline $^4$Charité -- Universitätsmedizin Berlin, Corporate Member of Freie Universität Berlin and Humboldt-Universität Berlin, Medical Directorate, Berlin, Germany \newline  \newline \newline \href{mailto:mario.fleischer@charite.de}{E-mail -  \textcolor{blue}{mario.fleischer@charite.de}}
output: 
  pdf_document:
    toc: yes
    number_sections: yes
    toc_depth: 6
    keep_tex: true    
  # html_document: default
  template: NULL
---
```{r setup, include=FALSE}
knitr::opts_chunk$set(echo = TRUE)
options(warn=-1)
devtools::install_github("kupietz/kableExtra")
```

# Definitions

## Read data

Set working directory according to your file hierarchy. The file "data.csv" is part of the supplemental data.

```{r}
rm(list = ls())
winds.data <- read.csv('data.csv')
singers.data.medians <- read.csv('data_sci_reports_muerbe_2021_medians.csv')
# singers.data.medians$PVR <- NULL
system('rm -f Schumann_Fig*.jpg Schumann_Fig*.pdf Schumann_Tab*.*')
```

## Load routines
```{r echo=FALSE,results='asis'}
source("lib.R")
```


## Clean data from non-respiratory particles 

We defined non-respiratory particles as ``bias'', which was provoked in additional tasks where the participants played the orchestral excerpts and 'Ode to the joy' by moving their fingers only and without any air flow into the instrument driven by the mouth (unplayed sequences).

### Non-biased data

```{r}
winds.data.ready <- dplyr::filter(winds.data,
                            (Condition == 'piano' |
                             Condition == 'forte' |
                             Condition == 'breathing' |
                             Condition == 'speaking'))
```

### Unplayed sequences

```{r}
winds.data.unplayed <- dplyr::filter(winds.data,
                            (Condition == 'orchestral_excerpt_unplayed' |
                             Condition == 'ode_unplayed' ))
```

### Biased sequences

```{r}


winds.data.played <- dplyr::filter(winds.data,
                            (Condition == 'orchestral_excerpt_played' |
                             Condition == 'ode_played'))
```


```{r echo=FALSE,message=FALSE,results='asis',fig.cap="\\label{fig:fig0}Boxplot of Volume rate for all participants.",fig.height = 2*plot_y,fig.width = plot_x}
winds.data.ready$Condition <- factor(winds.data.ready$Condition,
                               levels = c('breathing',
                                          'speaking',
                                          'piano',
                                          'forte'))

```


### Compute un-biased sequences


```{r}


winds.data.played$PM_0.3_0.5um <- winds.data.played$PM_0.3_0.5um-
                                              winds.data.unplayed$PM_0.3_0.5um
winds.data.played$PM_0.5_1.0um <- winds.data.played$PM_0.5_1.0um-
                                              winds.data.unplayed$PM_0.5_1.0um
winds.data.played$PM_1.0_3.0um <- winds.data.played$PM_1.0_3.0um-
                                              winds.data.unplayed$PM_1.0_3.0um
winds.data.played$PM_3.0_5.0um <- winds.data.played$PM_3.0_5.0um-
                                              winds.data.unplayed$PM_3.0_5.0um
winds.data.played$PM_5.0_10.0um <- winds.data.played$PM_5.0_10.0um-
                                              winds.data.unplayed$PM_5.0_10.0um


winds.data.played$PM_0.3_0.5um[winds.data.played$PM_0.3_0.5um<0] <- 0
winds.data.played$PM_0.5_1.0um[winds.data.played$PM_0.5_1.0um<0] <- 0
winds.data.played$PM_1.0_3.0um[winds.data.played$PM_1.0_3.0um<0] <- 0
winds.data.played$PM_3.0_5.0um[winds.data.played$PM_3.0_5.0um<0] <- 0
winds.data.played$PM_5.0_10.0um[winds.data.played$PM_5.0_10.0um<0] <- 0


col1 <- match("PM_0.3_0.5um",names(winds.data.played))
col2 <- match("PM_5.0_10.0um",names(winds.data.played))
winds.data.played$PM <- rowSums( winds.data.played[,col1:col2])

percentages <- colSums( winds.data.played[,col1:col2])
percentages_cumsum <- cumsum(percentages/sum(percentages)*100)


winds.data.aggregated = plyr::join(winds.data.played, winds.data.ready, type = "full")

rm(winds.data,
   winds.data.ready,
   winds.data.played,
   winds.data.unplayed)

```


# Calculate extended measures


```{r}
# shift PM (avoid NaN after log-transform)

winds.data.aggregated$shift.PM <-
                          winds.data.aggregated$PM+
                          winds.data.aggregated$Accuracy.PM

# log-transform PM
winds.data.aggregated$log.PM <- log10(winds.data.aggregated$shift.PM)


# compute acoustic pressure p
winds.data.aggregated$p <- (10^((winds.data.aggregated$SPL)/20))*2e-5
                                

# compute PM/p
winds.data.aggregated$PM2p <- winds.data.aggregated$PM/
                                  winds.data.aggregated$p

```

# Rename and re-order entries

```{r}
winds.data.aggregated$Condition[
                winds.data.aggregated$Condition ==
                  'ode_played'] <- 'Ode'
winds.data.aggregated$Condition[
                winds.data.aggregated$Condition ==
                  'orchestral_excerpt_played'] <- 'orchestral_excerpt'

winds.data.aggregated$Condition <- factor(winds.data.aggregated$Condition,
                               levels = c('breathing',
                                          'speaking',
                                          'piano',
                                          'forte',
                                          'Ode',
                                          'orchestral_excerpt'))
winds.data.aggregated$Instrument <- factor(winds.data.aggregated$Instrument,
                               levels = c('flute',
                                          'oboe',
                                          'trumpet',
                                          'clarinette'))

write.csv(winds.data.aggregated,"data_aggregated.csv", row.names = FALSE)

```

# Descriptive analysis

## Particle distributions

```{r,fig.cap="\\label{fig:fig1}Particle distributions.",fig.height = plot_y,fig.width = plot_x}
size_classes <- c(0.3, 0.5, 1.0, 3.0, 5.0, 10., 25.)
no_of_trials <- 5
dlogD = data.frame(log10(size_classes[2:6])-log10(size_classes[1:5]))
dlogD <- dlogD*length(unique(winds.data.aggregated$ID))*no_of_trials
size_categories <- c('C1','C2','C3','C4','C5') %>% data.frame()
names(dlogD) <- 'dlogD'
names(size_categories) <- 'size_categories'


winds.data.aggregated.classes <- winds.data.aggregated %>% dplyr::select(
   Instrument,
                                       Condition,
                                       PM_0.3_0.5um,
                                       PM_0.5_1.0um,
                                       PM_1.0_3.0um,
                                       PM_3.0_5.0um,
                                       PM_5.0_10.0um
)


winds.data.aggregated.classes.mean_eb.flute <- calc_mean_eb(list(
                                                    'data'=winds.data.aggregated.classes,
                                                    'size_categories'=size_categories),
                                                    'flute')

winds.data.aggregated.classes.mean_eb.oboe <- calc_mean_eb(list(
                                                    'data'=winds.data.aggregated.classes,
                                                    'size_categories'=size_categories),
                                                    'oboe')

winds.data.aggregated.classes.mean_eb.clarinette <- calc_mean_eb(list(
                                                    'data'=winds.data.aggregated.classes,
                                                    'size_categories'=size_categories),
                                                    'clarinette')

winds.data.aggregated.classes.mean_eb.trumpet <- calc_mean_eb(list(
                                                    'data'=winds.data.aggregated.classes,
                                                    'size_categories'=size_categories),
                                                    'trumpet')


p01 <- plotID_dist_bar(winds.data.aggregated.classes.mean_eb.flute,
                  "Flute","$P_N$ in P/s",
                  "",
                  c(1,10000))

p02 <- plotID_dist_bar(winds.data.aggregated.classes.mean_eb.oboe,
                  "Oboe","",
                  "",
                  c(1,10000))

p03 <- plotID_dist_bar(winds.data.aggregated.classes.mean_eb.clarinette,
                  "Clarinette","$P_N$ in P/s",
                  "Particle diameter $(D_p)$ in $\\mu$m",
                  c(1,10000))

p04 <- plotID_dist_bar(winds.data.aggregated.classes.mean_eb.trumpet,
                  "Trumpet","",
                  "Particle diameter $(D_p)$ in $\\mu$m",
                  c(1,10000))

p0 <- gridExtra::grid.arrange(p01,p02,p03,p04,nrow=2)


ggsave(
   "./Schumann_Fig2.pdf",
   device=cairo_pdf,
   plot = p0,
   width = plot_x,
   height = plot_y,
   units = c("in"),
   dpi = 600,
)

ggsave(
   "./Schumann_Fig2.jpg",
   plot = p0,
   width = plot_x,
   height = plot_y,
   units = c("in"),
   dpi = 600,
)
```


## Compute medians (of medians)


```{r}

library(dplyr)

winds.data.aggregated.medians.1 = aggregate(SPL ~ 
                                              ID+Condition, winds.data.aggregated, median)
winds.data.aggregated.medians.2 = aggregate(Instrument ~ 
                                              ID+Condition, winds.data.aggregated, first)


winds.data.aggregated.medians.5 = aggregate(PM ~
                                              ID+Condition, winds.data.aggregated, median)
winds.data.aggregated.medians.6 = aggregate(PM2p ~
                                              ID+Condition, winds.data.aggregated, median)

winds.data.aggregated.medians.7 = aggregate(PVR ~
                                              ID+Condition, winds.data.aggregated, median)

winds.data.aggregated.medians = plyr::join(winds.data.aggregated.medians.1, 
                                           winds.data.aggregated.medians.2, 
                                           type = "inner")

winds.data.aggregated.medians = plyr::join(winds.data.aggregated.medians, 
                                           winds.data.aggregated.medians.5, 
                                           type = "inner")
winds.data.aggregated.medians = plyr::join(winds.data.aggregated.medians, 
                                           winds.data.aggregated.medians.6, 
                                           type = "inner")

winds.data.aggregated.medians = plyr::join(winds.data.aggregated.medians, 
                                           winds.data.aggregated.medians.7, 
                                           type = "inner")

rm(winds.data.aggregated.medians.1,
   winds.data.aggregated.medians.2,
   winds.data.aggregated.medians.5,
   winds.data.aggregated.medians.6,
   winds.data.aggregated.medians.7
   )

```


## Combine group medians with that from professional singers

```{r}

winds.data.aggregated.medians.wisi  <- winds.data.aggregated.medians
winds.data.aggregated.medians.wisi$SPL <- NULL
winds.data.aggregated.medians.wisi$PM2p <- NULL
winds.data.aggregated.medians.wisi <- rbind(winds.data.aggregated.medians.wisi, 
                                            singers.data.medians)


winds.data.aggregated.medians.wisi$Condition <- 
   as.character(winds.data.aggregated.medians.wisi$Condition)
winds.data.aggregated.medians.wisi$Condition[
      winds.data.aggregated.medians.wisi$Condition ==
                                          'orchestral_excerpt'] <- 'o.e./Song'

winds.data.aggregated.medians.wisi$Instrument <- 
   as.character(winds.data.aggregated.medians.wisi$Instrument)
winds.data.aggregated.medians.wisi$Instrument[
      winds.data.aggregated.medians.wisi$Instrument !='Singer' &
           (winds.data.aggregated.medians.wisi$Condition == 'breathing' |
            winds.data.aggregated.medians.wisi$Condition == 'speaking')
                                              ] <- 'All participants'

winds.data.aggregated.medians.wisi$Condition <- 
   factor(winds.data.aggregated.medians.wisi$Condition,
                               levels = c('breathing',
                                          'speaking',
                                          'piano',
                                          'forte',
                                          'Ode',
                                          'o.e./Song'))
winds.data.aggregated.medians.wisi$Instrument <- 
   factor(winds.data.aggregated.medians.wisi$Instrument,
                               levels = c('flute',
                                          'oboe',
                                          'trumpet',
                                          'clarinette',
                                          'Singer',
                                          'All participants'))
```


## $P_N$ for all test conditions (incl. data from professional singers)

```{r echo=FALSE,message=FALSE,results='asis',fig.cap="\\label{fig:fig4}Boxplot of $P_N$ for all participants (based on group medians of (mostly) five replications of each task (respiratoric emitted particles only)). Values for singers were adapted from the supplemental information from Mürbe et al (2021), https://doi.org/10.1038/s41598-021-93281-x",fig.height = plot_y,fig.width = plot_x}


p3 <- plotID(winds.data.aggregated.medians.wisi,
             winds.data.aggregated.medians.wisi$Condition,
             winds.data.aggregated.medians.wisi$PM,
             winds.data.aggregated.medians.wisi$Instrument,
             c(1e0,1e5),"$P_N$ in P/s")
p3
ggsave(
   "./Schumann_Fig3.pdf",
   device=cairo_pdf,
   plot = p3,
   width = .5*plot_x,
   height = .5*plot_y,
   units = c("in"),
   dpi = 600,
)
ggsave(
   "./Schumann_Fig3.jpg",
   plot = p3,
   width = .5*plot_x,
   height = .5*plot_y,
   units = c("in"),
   dpi = 600,
)
```


## Sound pressure level


```{r echo=FALSE,message=FALSE,results='asis',fig.cap="\\label{fig:fig41}Boxplot of the sound pressure level $L_{AF_{MAX}}$ for all participants (based on medians of five replications of each task).",fig.height = plot_y,fig.width = plot_x}
winds.data.medians.pifo  <- dplyr::filter(winds.data.aggregated.medians,
                            (Condition == 'piano' |
                             Condition == 'forte'))
p41 <- plotID_lin(winds.data.medians.pifo,
                 winds.data.medians.pifo$Condition,
                 winds.data.medians.pifo$SPL,
                 winds.data.medians.pifo$Instrument,
                 c(50,100),"$L_{AF_{MAX}}$ in dB SPL")
p41


ggsave(
   "./Schumann_Fig4A.pdf",
   device=cairo_pdf,
   plot = p41,
   width = 0.5*plot_x,
   height = 0.5*plot_y,
   units = c("in"),
   dpi = 600,
)
ggsave(
   "./Schumann_Fig4A.jpg",
   plot = p41,
   width = 0.5*plot_x,
   height = 0.5*plot_y,
   units = c("in"),
   dpi = 600,
)

```

## $P_N$/p

```{r echo=FALSE,message=FALSE,results='asis',fig.cap="\\label{fig:fig42}Boxplot of $P_N$ related to the acoustic pressure $p=10^{L_{AF_{MAX}}/20}\\cdot 2\\times 10^{-5}$ Pa for all participants (based on medians of five replications of each task).",fig.height = plot_y,fig.width = plot_x}

p42 <- plotID(winds.data.medians.pifo,
             winds.data.medians.pifo$Condition,
             winds.data.medians.pifo$PM2p,
             winds.data.medians.pifo$Instrument,
             c(1e1,1e5),"$P_N/p$ in P/(s$\\cdot$Pa)")
p42


ggsave(
   "./Schumann_Fig4B.pdf",
   device=cairo_pdf,
   plot = p42,
   width = 0.5*plot_x,
   height = 0.5*plot_y,
   units = c("in"),
   dpi = 600,
)
ggsave(
   "./Schumann_Fig4B.jpg",
   plot = p42,
   width = 0.5*plot_x,
   height = 0.5*plot_y,
   units = c("in"),
   dpi = 600,
)
```

## Particle volume rate for all test conditions (incl. data from professional singers)

```{r echo=FALSE,message=FALSE,results='asis',fig.cap="\\label{fig:figA5}Boxplot of Particle Volume Rate $\\dot{V}$ for all participants (based on group medians of (mostly) five replications of each task (respiratoric emitted particles only)). Values for singers were adapted from the supplemental information from Mürbe et al (2021), https://doi.org/10.1038/s41598-021-93281-x",fig.height = plot_y,fig.width = plot_x}


pA5 <- plotID(winds.data.aggregated.medians.wisi,
             winds.data.aggregated.medians.wisi$Condition,
             winds.data.aggregated.medians.wisi$PVR,
             winds.data.aggregated.medians.wisi$Instrument,
             c(1e-12,1e-5),"$\\dot{V}$ in ml/s")
pA5
ggsave(
   "./Schumann_FigA5.pdf",
   device=cairo_pdf,
   plot = pA5,
   width = .5*plot_x,
   height = .5*plot_y,
   units = c("in"),
   dpi = 600,
)
ggsave(
   "./Schumann_FigA5.jpg",
   plot = pA5,
   width = .5*plot_x,
   height = .5*plot_y,
   units = c("in"),
   dpi = 600,
)
```


# Confirmatory analysis (Linear-Mixed-Effect-Modeling)

## Experiment 1: Piano and forte

```{r echo=FALSE}
winds.data.aggregated.pifo <- dplyr::filter(winds.data.aggregated,
                            (Condition == 'piano' |
                             Condition == 'forte'))
```


```{r}
model.winds.data.aggregated.log.PM.pifo <-
                  lmerTest::lmer(log.PM~Instrument+Condition
                   +(1|ID),
                  winds.data.aggregated.pifo,
                  REML=TRUE)
jtools::summ(model.winds.data.aggregated.log.PM.pifo, digits = 3)
```


## Experiment 2: Playing orchestral excerpt and 'Ode to the joy'

```{r echo=FALSE}
winds.data.aggregated.pl <- dplyr::filter(winds.data.aggregated,
                            (Condition != 'piano' &
                             Condition != 'forte' &
                             Condition != 'breathing' &
                             Condition != 'speaking'))
```


```{r}
model.winds.data.aggregated.log.PM.pl <-
                  lmerTest::lmer(log.PM~Instrument+Condition
                   +(1|ID),
                  winds.data.aggregated.pl,
                  REML=TRUE)

jtools::summ(model.winds.data.aggregated.log.PM.pl, digits = 3)
```


# Appendix

## Minimum, maximum, and median values for all conditions (based on group medians)

### $P_N$ values

```{r echo=FALSE}
PM.pi <- create_table_instrument(winds.data.aggregated.medians,'PM','piano')
PM.fo <- create_table_instrument(winds.data.aggregated.medians,'PM','forte')
PM.ode <- create_table_instrument(winds.data.aggregated.medians,'PM','Ode')
PM.o.e <- create_table_instrument(winds.data.aggregated.medians,'PM','orchestral_excerpt')

# delete zero to be consistent with boxplots in Fig. 3A
data.table::setDT(winds.data.aggregated.medians.wisi)[PM == 0., PM := NA]
PM.br <- create_table_instrument(winds.data.aggregated.medians.wisi,'PM','breathing')
PM.sp <- create_table_instrument(winds.data.aggregated.medians.wisi,'PM','speaking')


knitr::kable(list(PM.pi,PM.fo), caption='$P_N$ - Values for piano (left) and forte (right) in P/s',format='latex')
knitr::kable(list(PM.ode, PM.o.e), caption='$P_N$ - Values for Ode to joy (left) and orchestral excerpt (right) in P/s',format='latex')
knitr::kable(list(PM.br, PM.sp), caption='$P_N$ - Values for breathing (left) and speaking (right) in P/s',format='latex')
```


### $P_N/p$ values

```{r echo=FALSE}
PM2p.pi <- create_table_instrument(winds.data.aggregated.medians,'PM2p','piano')
PM2p.fo <- create_table_instrument(winds.data.aggregated.medians,'PM2p','forte')

knitr::kable(list(PM2p.pi,PM2p.fo), caption='$P_N/p$ - Values for piano (left) and forte (right) in P/(s$\\cdot$Pa)',format='latex')
```

## Packages used for this study

```{r}
sessionInfo()
```
