# Supplementary figures and images for: Investigation of the Emission Rate of Particles when Musicians Play Wind, Woodwind, and Brass Instruments
Source: Hindawi journal article supplement (doi:10.1155/2023/8092828), 2023-12-21

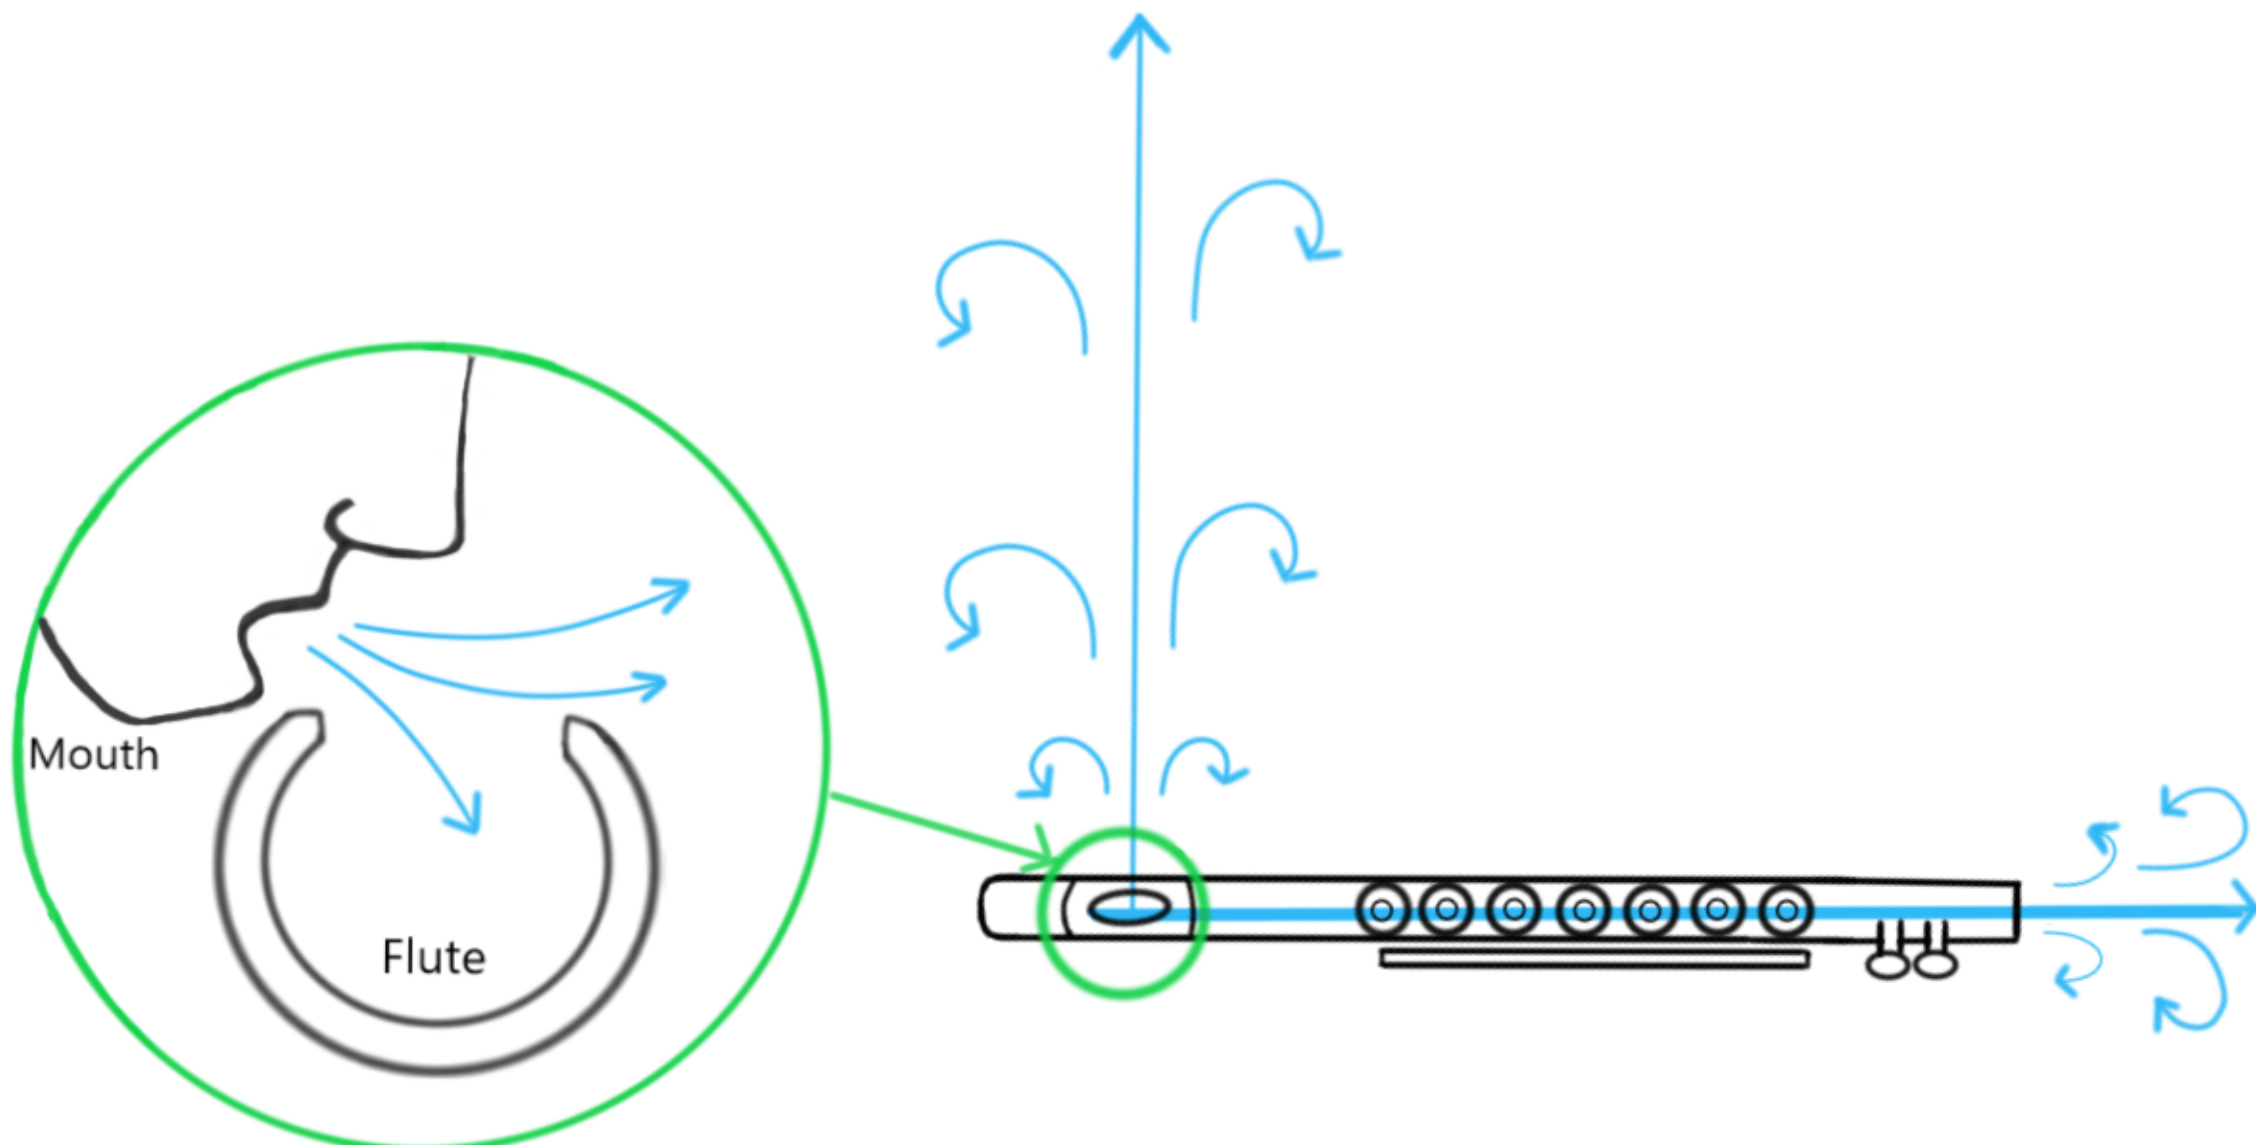

Mouth

Flute

Supplement: f1 [file 8092828.f1.pdf]

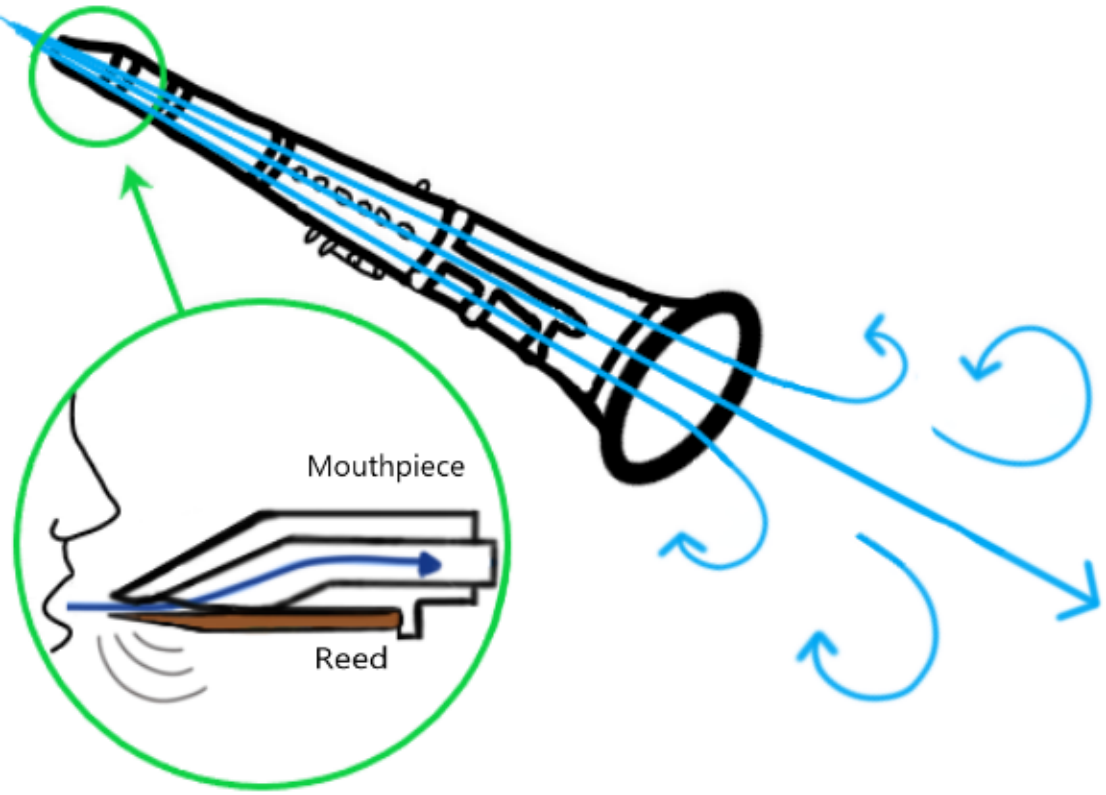

Supplement: f2 [file 8092828.f2.pdf]

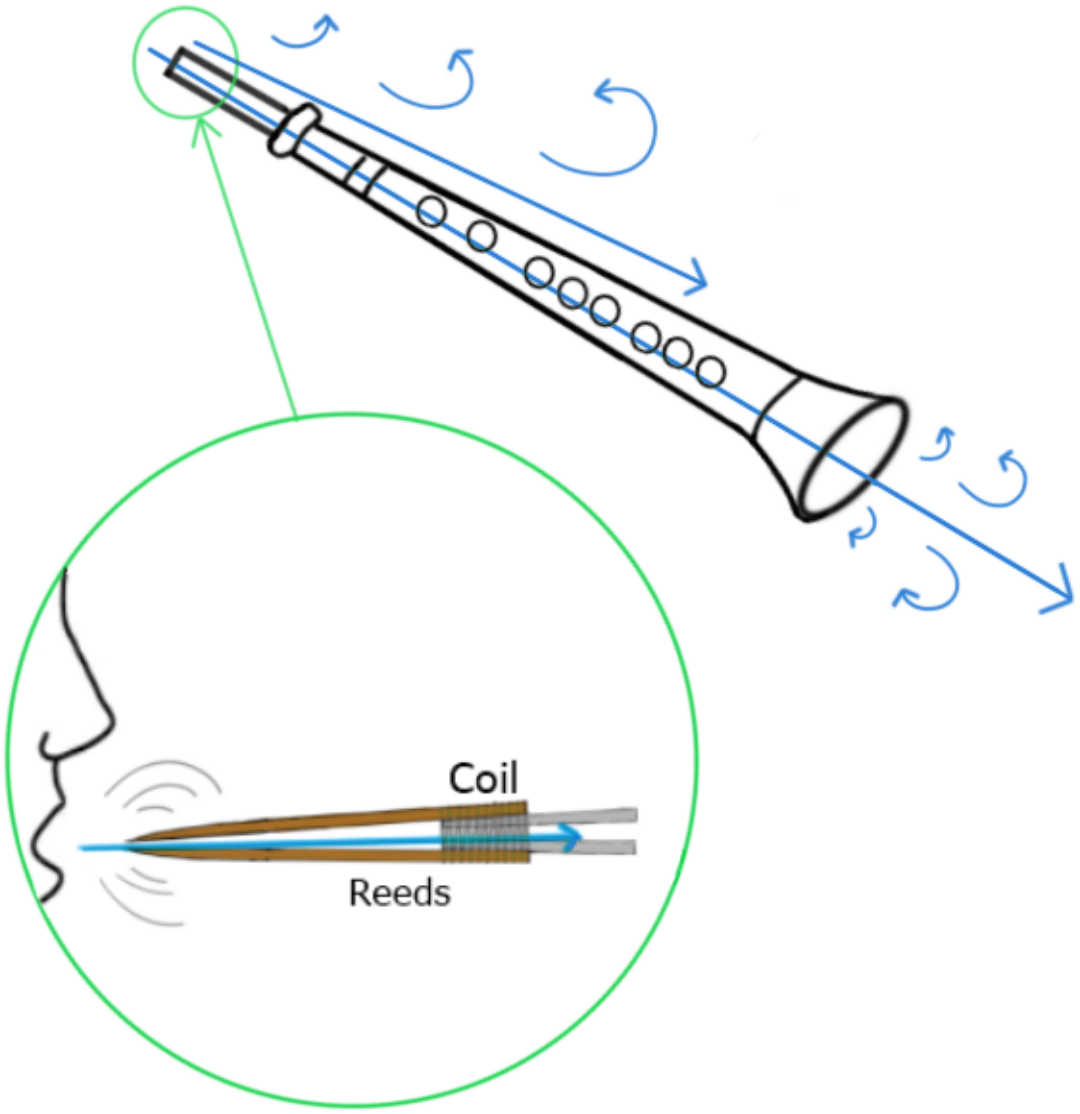

Supplement: f3 [file 8092828.f3.pdf]

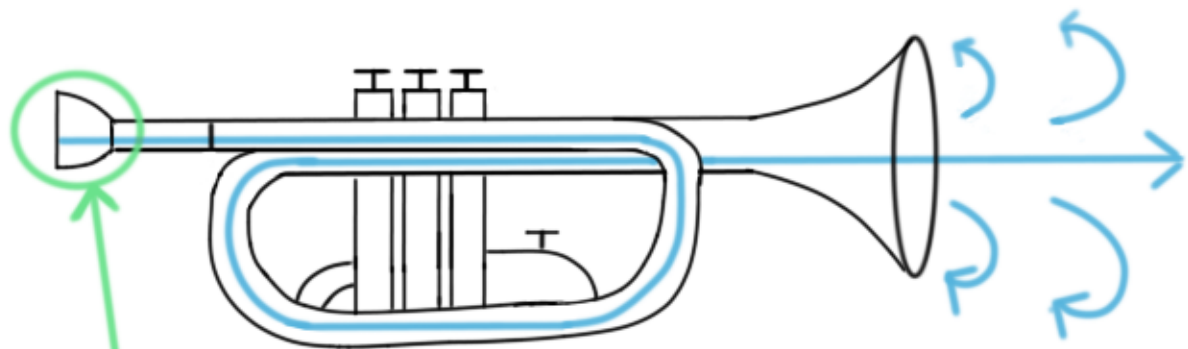

Lips(vibrating)

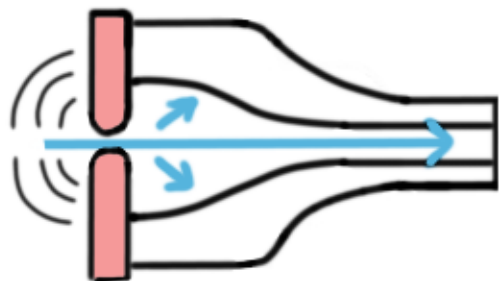

Mouthpiece

Supplement: f4 [file 8092828.f4.pdf]

Concentration in Particles/cf

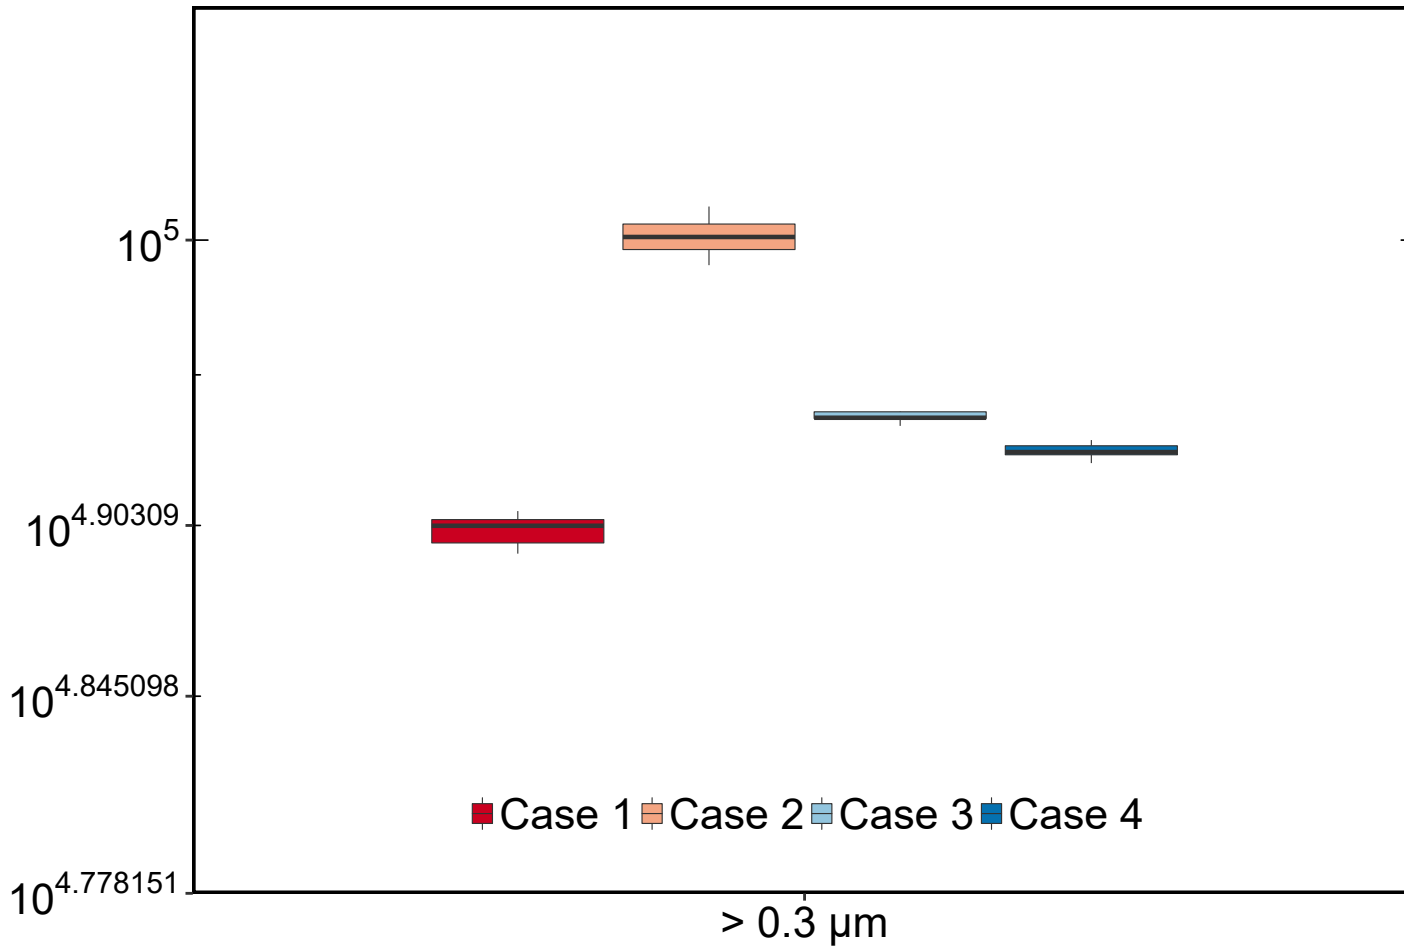

Case 1 Case 2 Case 3 Case 4

$> 0.3 \mu\text{m}$

Supplement: f5 [file 8092828.f5.pdf]

Concentration in Particles/cf

$10^5$   
 $10^{4.477121}$   
 $10^4$

Case 1 Case 2 Case 3 Case 4

> 0.5  $\mu\text{m}$

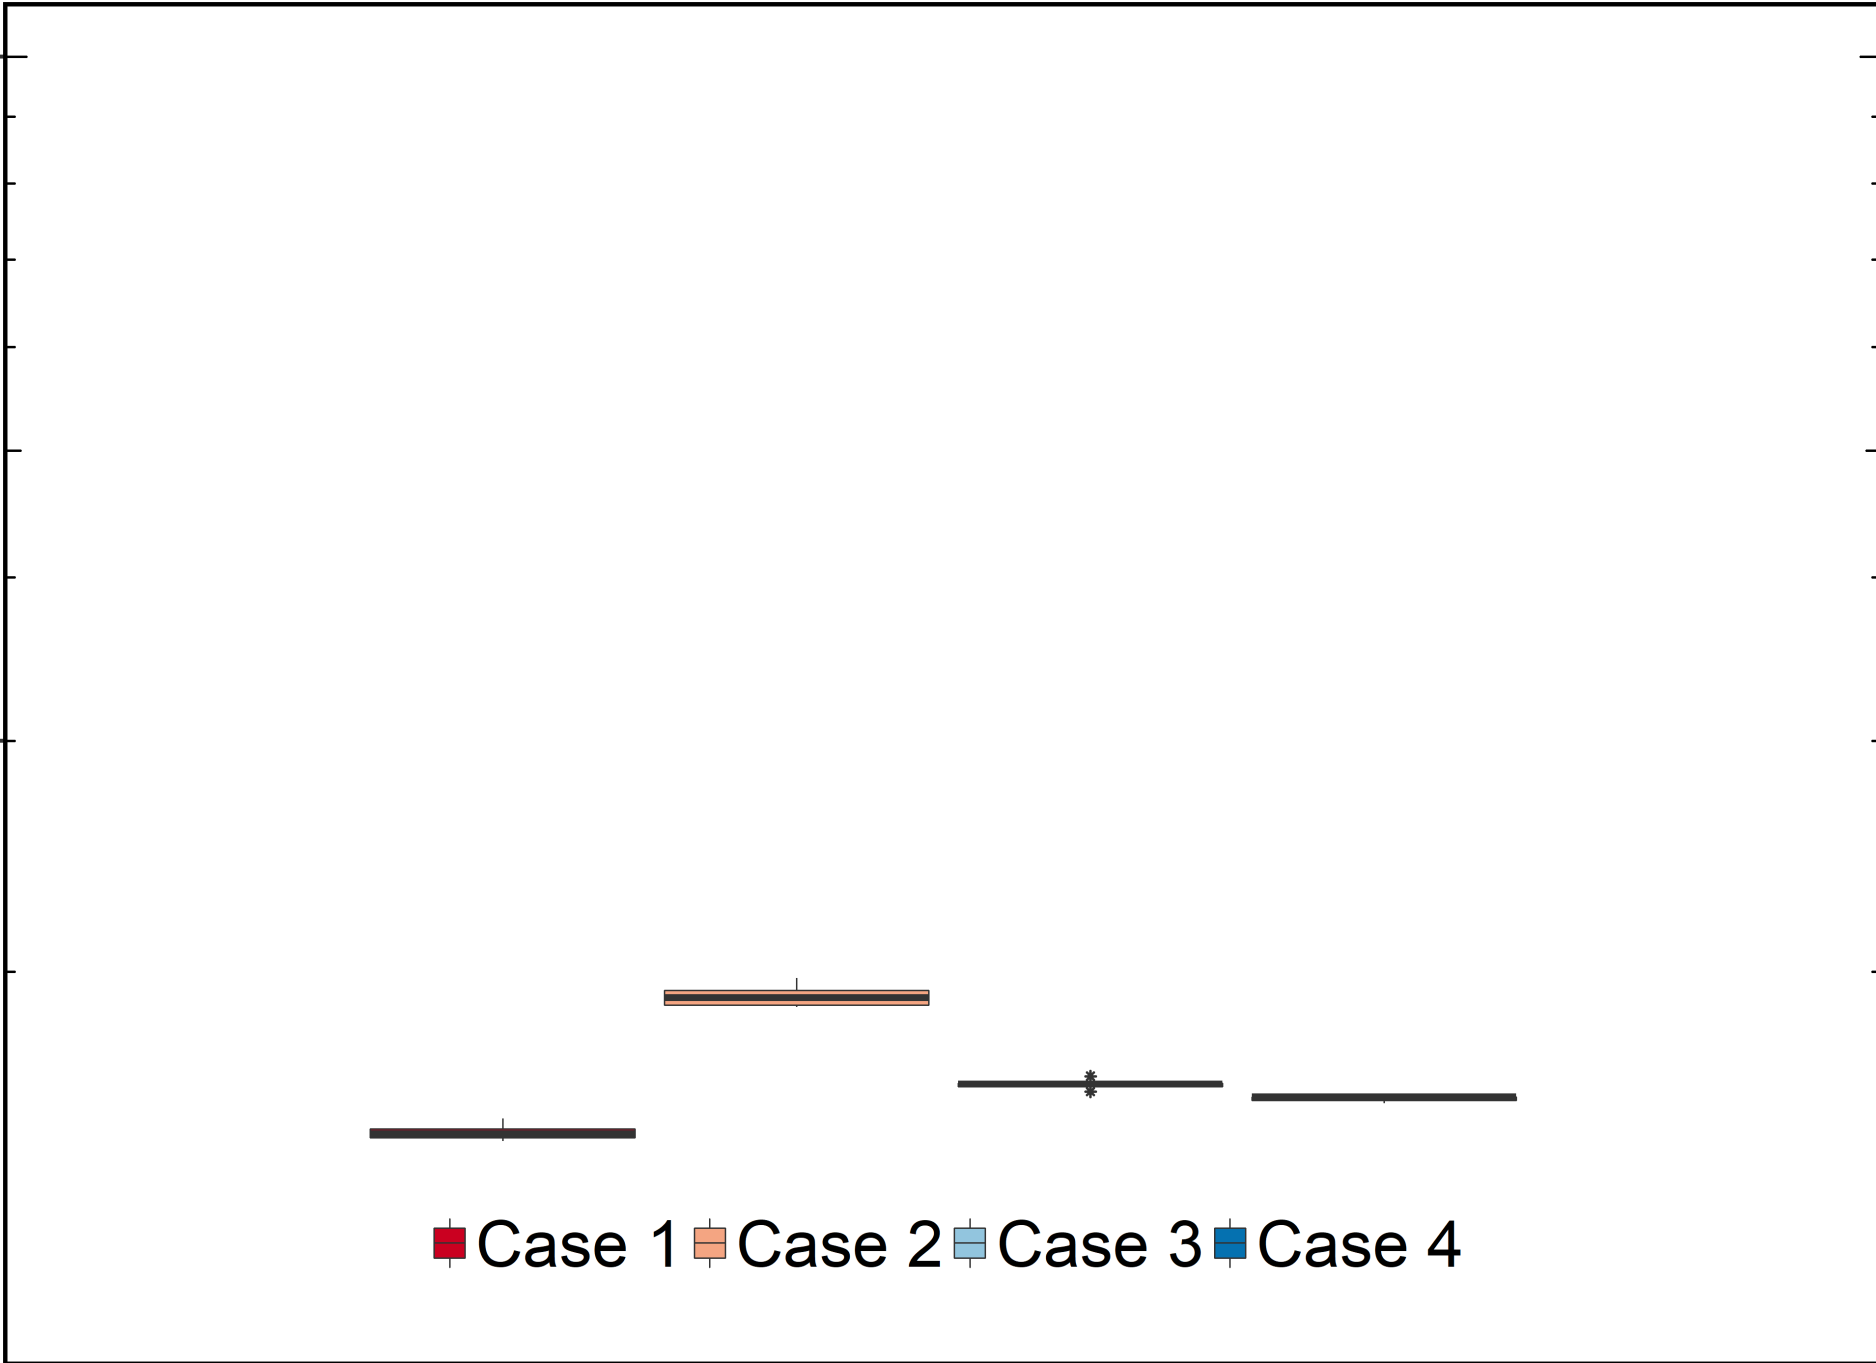

Supplement: f6 [file 8092828.f6.pdf]

Concentration in Particles/cf

$10^4$   
 $10^{3.477121}$   
 $10^3$

Case 1 Case 2 Case 3 Case 4

> 1.0  $\mu\text{m}$

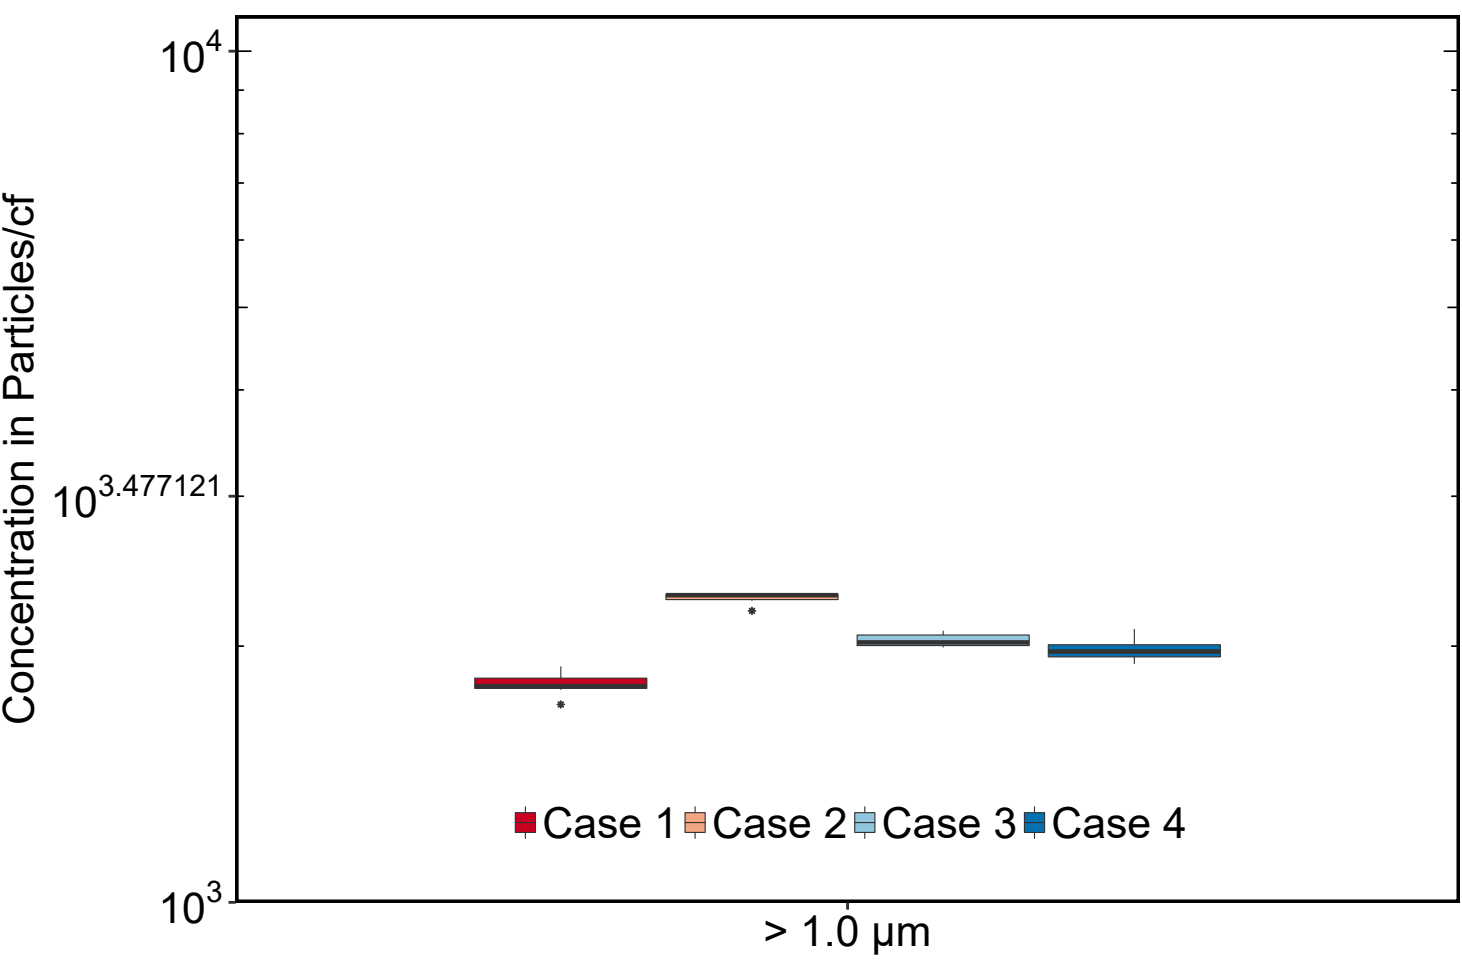

Supplement: f7 [file 8092828.f7.pdf]
